# Supplementary material for: Coalescence of water droplets at 125 K
Source: Research Square preprint supplement (doi:10.21203/rs.3.rs-5112004/v1), 2025-02-27
Supplement: Supplementary file 1 [file ce425562bbf53871921d0a81.docx]

# Supplementary Information

Coalescence of Water Droplets at 125 K

Johannes Giebelmann1, Tobias Eklund 2,3,4, Ulrike Boesenberg3, Jan-Etienne Pudell3, Wonhyuk Jo3, Johannes Möller3, Angel Rodriguez-Fernandez3, James Wrigley3, Alexey Zozulya3, Anders Madsen3, Pit Bartl1, Fiona Berner2,4, Robert P.C. Bauer5,6, Niels C. Giesselmann5, Alexander Gierke5, Radim Štůsek7, Lukáš Veselý7, Dominik Heger7, Claudia Goy5, Gerhard Grübel3,5, Felix Lehmkühler5,8,Katrin Amann-Winkel2,4, and Thomas Loerting1

*1 Institute of Physical Chemistry,University of Innsbruck, 6020 Innsbruck, Austria*

*2 Max Planck Institute for Polymer Research, Mainz 55128, Germany*

*3 European X-ray Free-Electron Laser Facility, 22869 Schenefeld, Germany*

*4Institute of Physics, Johannes Gutenberg University Mainz, Staudingerweg7, 55128 Mainz, Germany*

*5Deutsches Elektronen-Synchrotron DESY, 22607 Hamburg, Germany*

*6Freiberg Center for Water Research, Winklerstraße 5, 09599 Freiberg, Germany*

*7Department of Chemistry, Masaryk University, 601 77 Brno, Czechia*

*8The Hamburg Centre for Ultrafast Imaging, Luruper Chaussee 149, 22761 Hamburg, Germany.*

# S1 Supplementary Information Description

This supplementary material contains a list of samples, wide-angle X-ray scattering (WAXS) data, details regarding the temperature correction procedure, supplemental small-angle X-ray scattering (SAXS) data, details on the normalization procedure, additional scanning electron microscopy (SEM) data, and data from preliminary experiments at the P10 beamline (PETRA III, DESY). The temperate-dependent WAXS data include the observation of the polyamorphic transition and crystallization as well as an analysis of possible beam damage for different attenuation settings.

# S2 Sample Information

*S.2.1 Overview*

Table S1 gives an overview of samples including their type and identifier. Micron-sized vitrified droplets are referred to as hyperquenched glassy water (HGW). Densified HGW (dHGW) is equivalent1 to high-density amorphous ice (HDA). Low-density amorphous ice (LDA) was prepared *in situ* by heating sample 02, dHGW. The identifier is used in the figures below to distinguish between the individual samples. Details on the sample preparation are given in the methods section of the main text.

**Table S1:** Overview of samples including name, type and method.

| Identifier | Type | Used For |
| --- | --- | --- |
| Sample 01 | HGW on Cu grid | SAXS/WAXS |
| Sample 02 | dHGW (HDA) on Cu grid | SAXS/WAXS |
| Sample 02.5 | LDA on Cu grid | SAXS/WAXS |
| Sample 03 | HGW on Cu grid | SAXS/WAXS |
| Sample 04 | HGW on Cu grid | SAXS/WAXS |
| Sample 05 | HGW on Cu grid | SAXS/WAXS |
| Sample 06 | HGW | SEM |


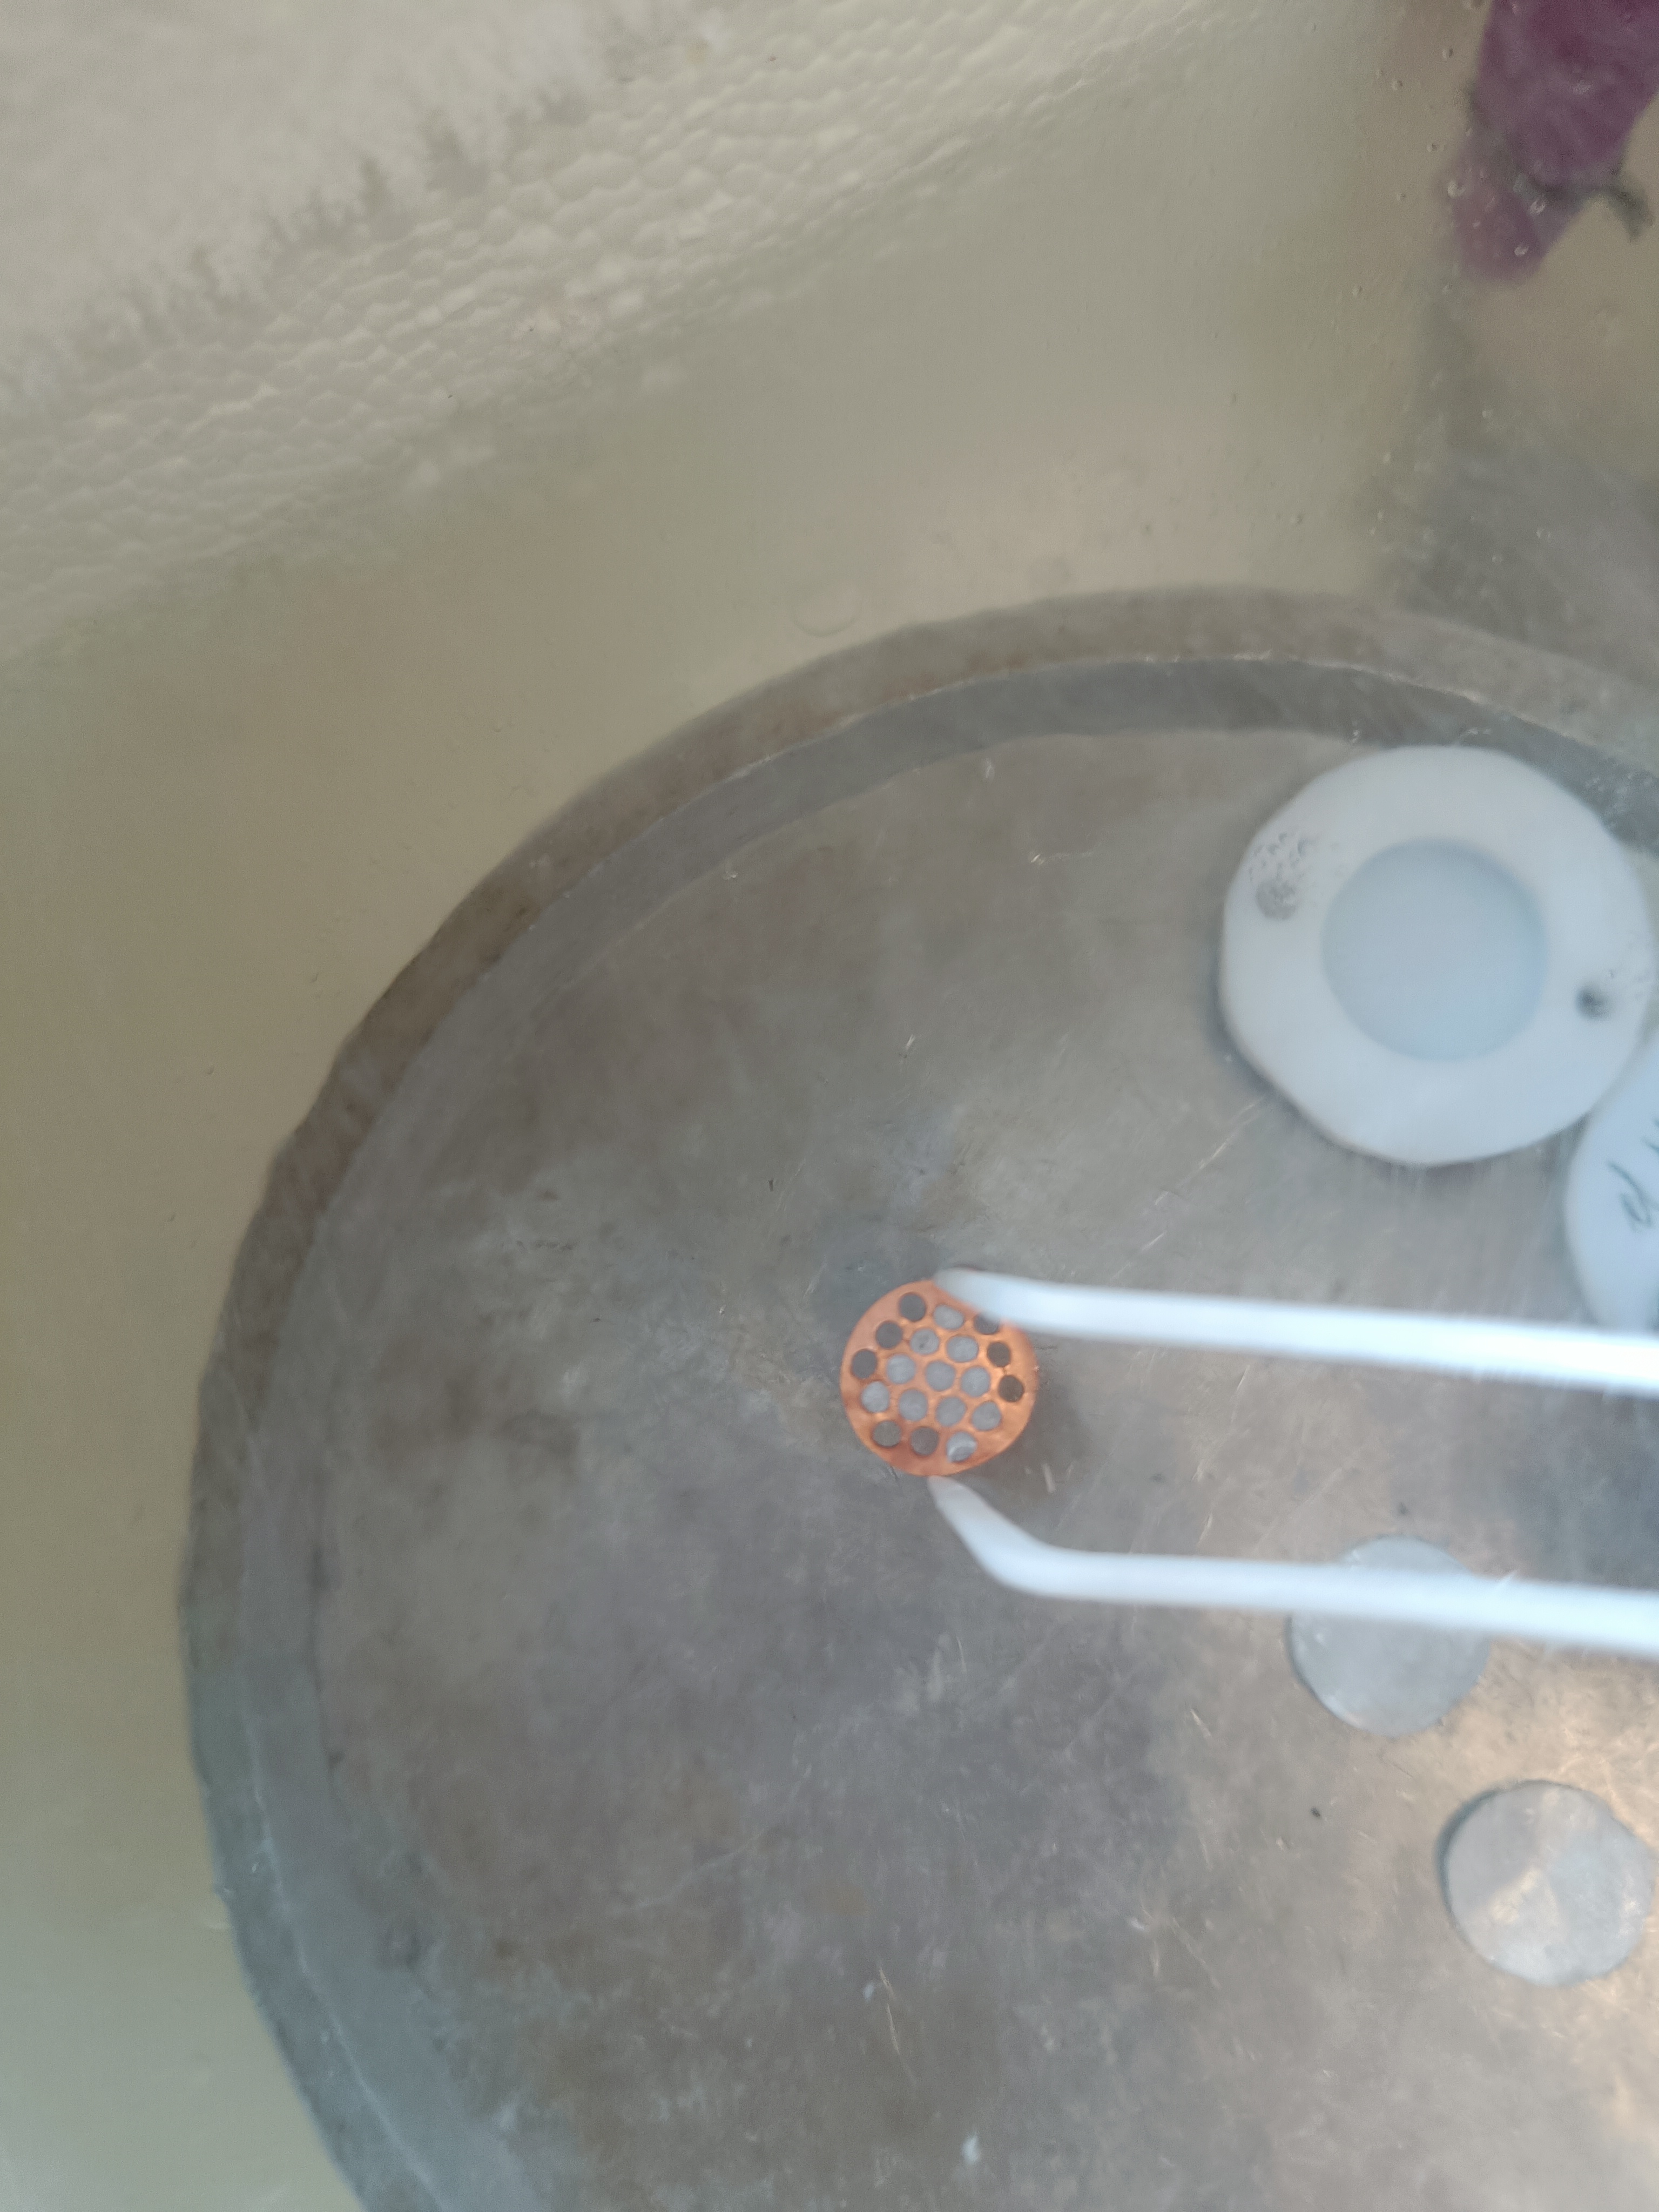

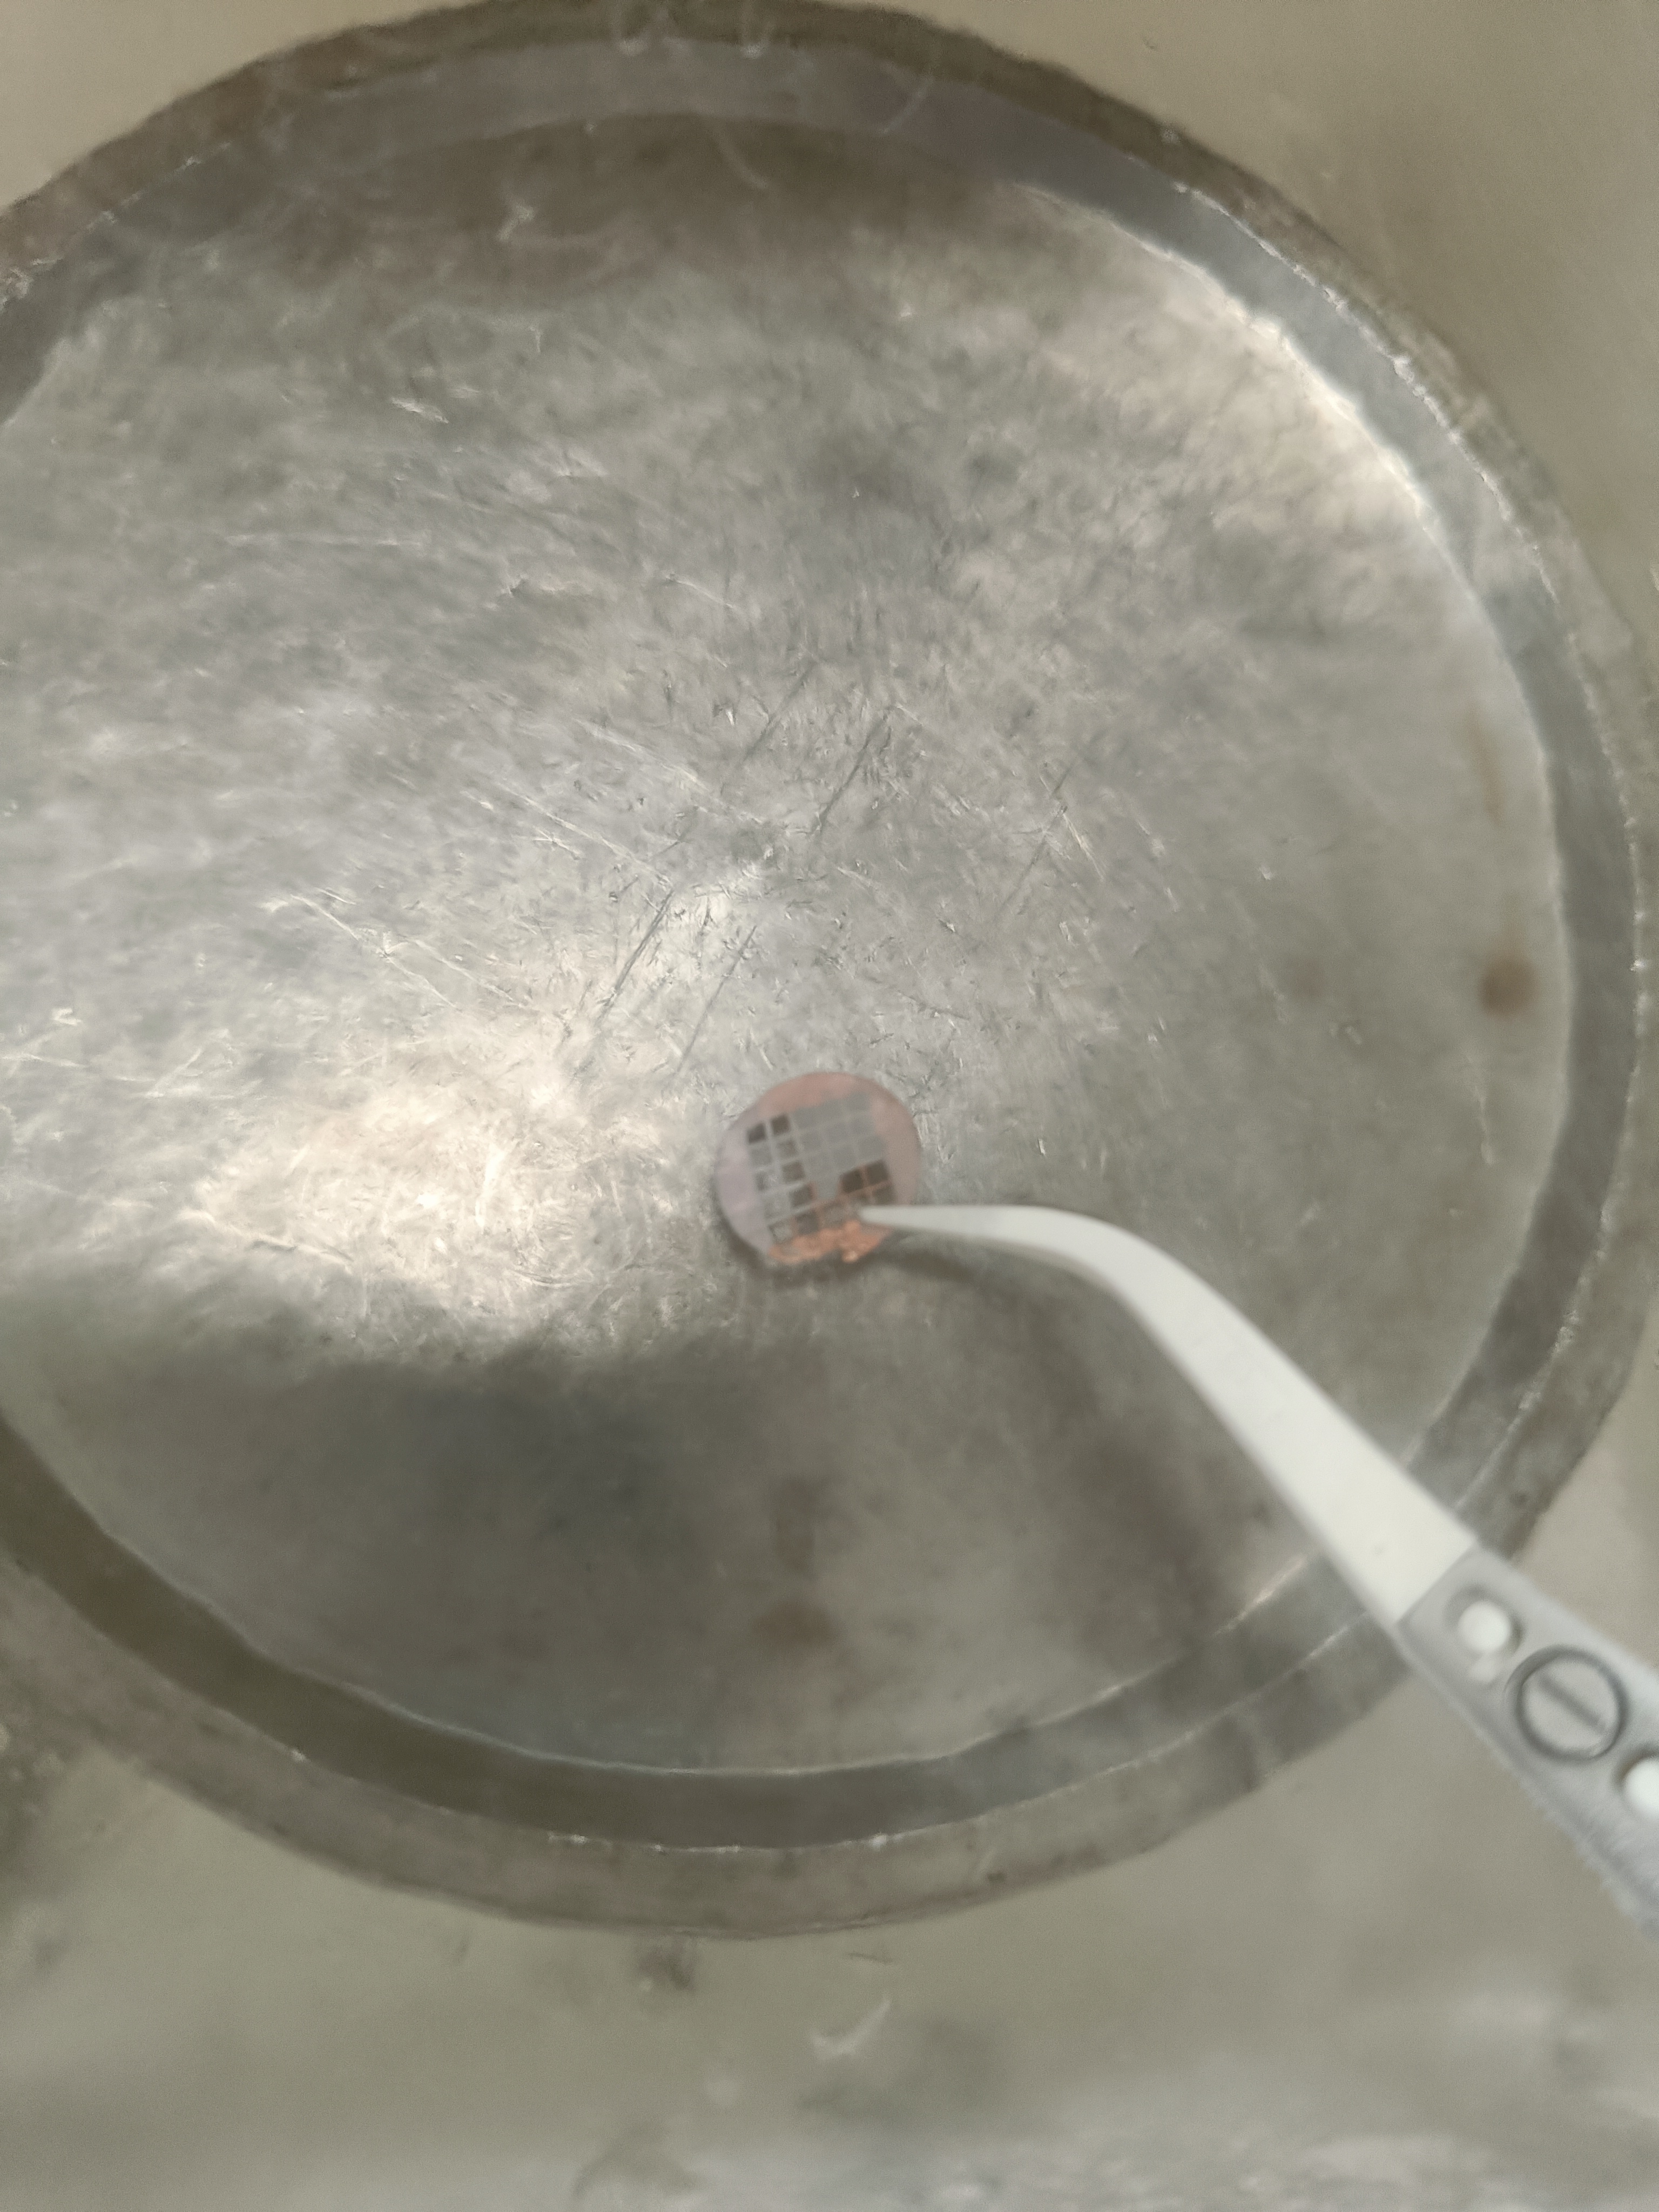

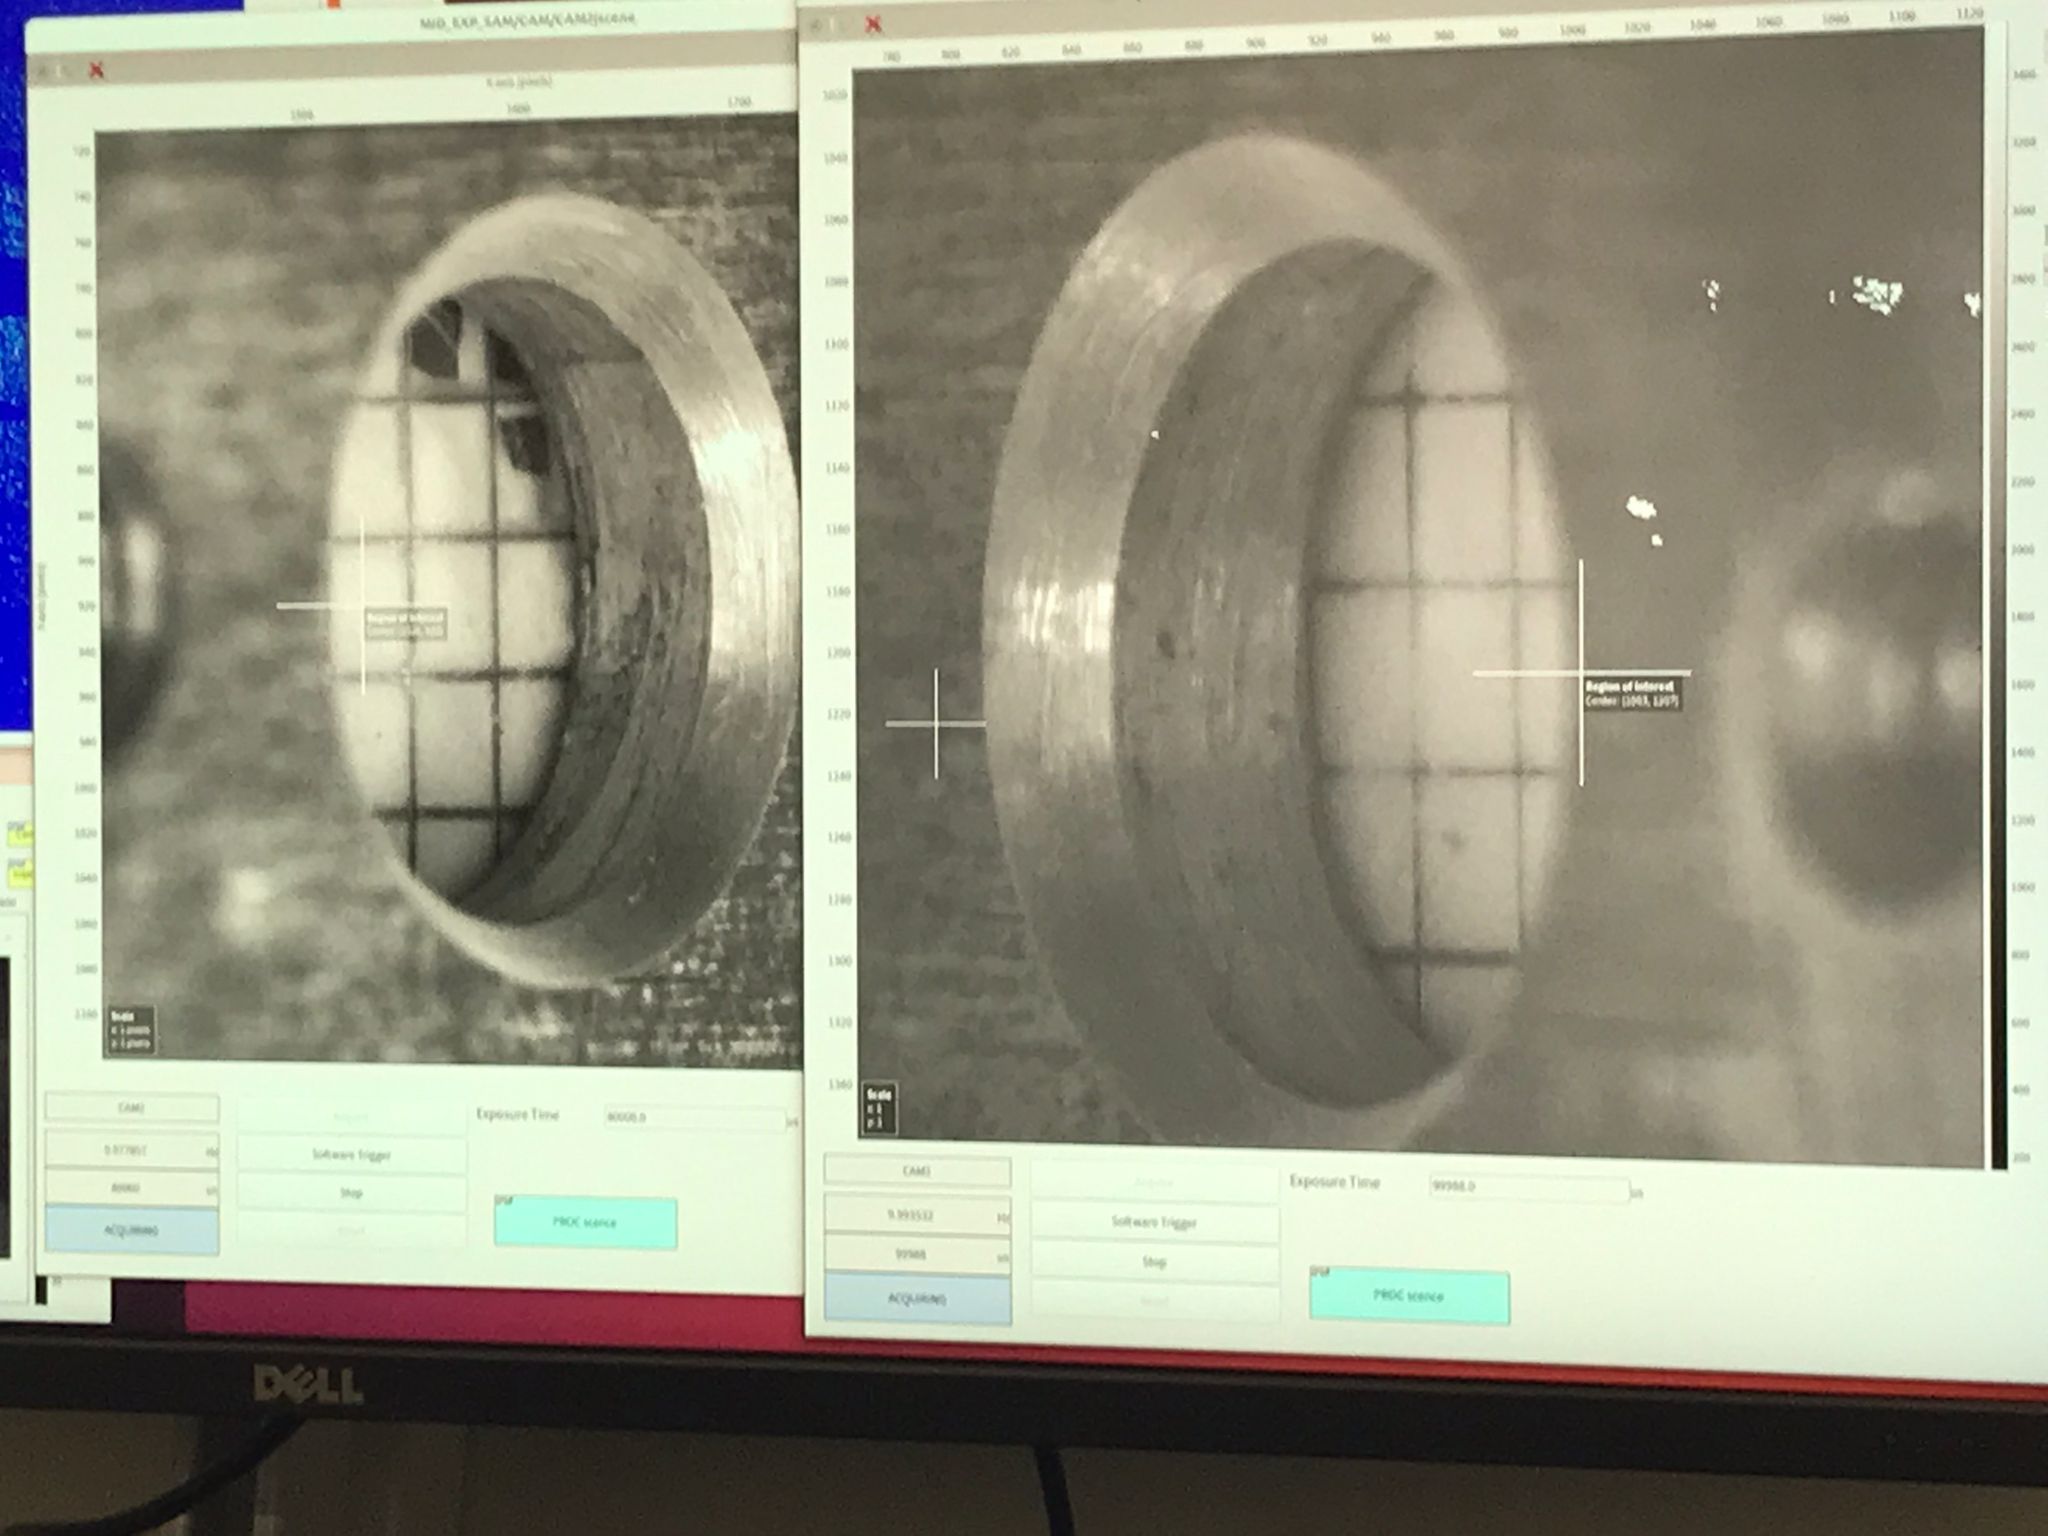


C)

B)

A)

**Figure S1:** A) Densified HGW (HDA) on Cu grid (200 µm thick, 10 mm diameter). B) HGW on Cu grid (50 µm thick, 10 mm diameter). C) HGW on Cu grid (50 µm thick, 10 mm diameter) mounted on the sample holder at the MID2 instrument.

The samples were placed on Cu grids for SAXS/WAXS. HGW was directly deposited on commercially available Cu grids (Gilder SEMF3; 50 µm thick, 10 mm diameter; see figure S1B/C) while dHGW (HDA) powder was pressed into Cu grids (200 µm thick, 10 mm diameter, see figure S1A), custom-made in Mainz.

*S2.2 Preliminary Characterization of Vitrified Water Droplets (HGW) on Cu Grids*

Hyperquenching requires very fast cooling induced by heat transfer from the micron-sized water droplets to the copper substrate and subsequently, to the cooling medium (liquid nitrogen).3 Even small variations of the experimental parameters such as size of individual droplets, flow of carrier gas, distance between orifice and substrate, pressure in the vacuum chamber, thermal conductivity of the substrate, thermal contact of sample with substrate or thickness of deposit can cause partial crystallization instead of vitrification. In the present study we have for the first time used the procedure of a direct deposition into a grid. To verify that hyperquenching for direct deposition into a copper grid yields sufficiently pure (*i.e.* glassy, ice-free) samples, differential scanning calorimetry (DSC) was used to quantify the amorphicity of the samples. To this end, a small splinter of sample (< 10 mg) was detached from the Cu-grid (see figure S1B) and transferred to an aluminum crucible under liquid nitrogen. Then, the crucible was loaded at 90 K into a PerkinElmer DSC 8000, calibrated with indium, cyclopentane, and adamantane for heating and cooling rates of 10 and 30 K min-1. The samples were heated from 90 K to ambient temperature at a heating rate of 30 K min-1.


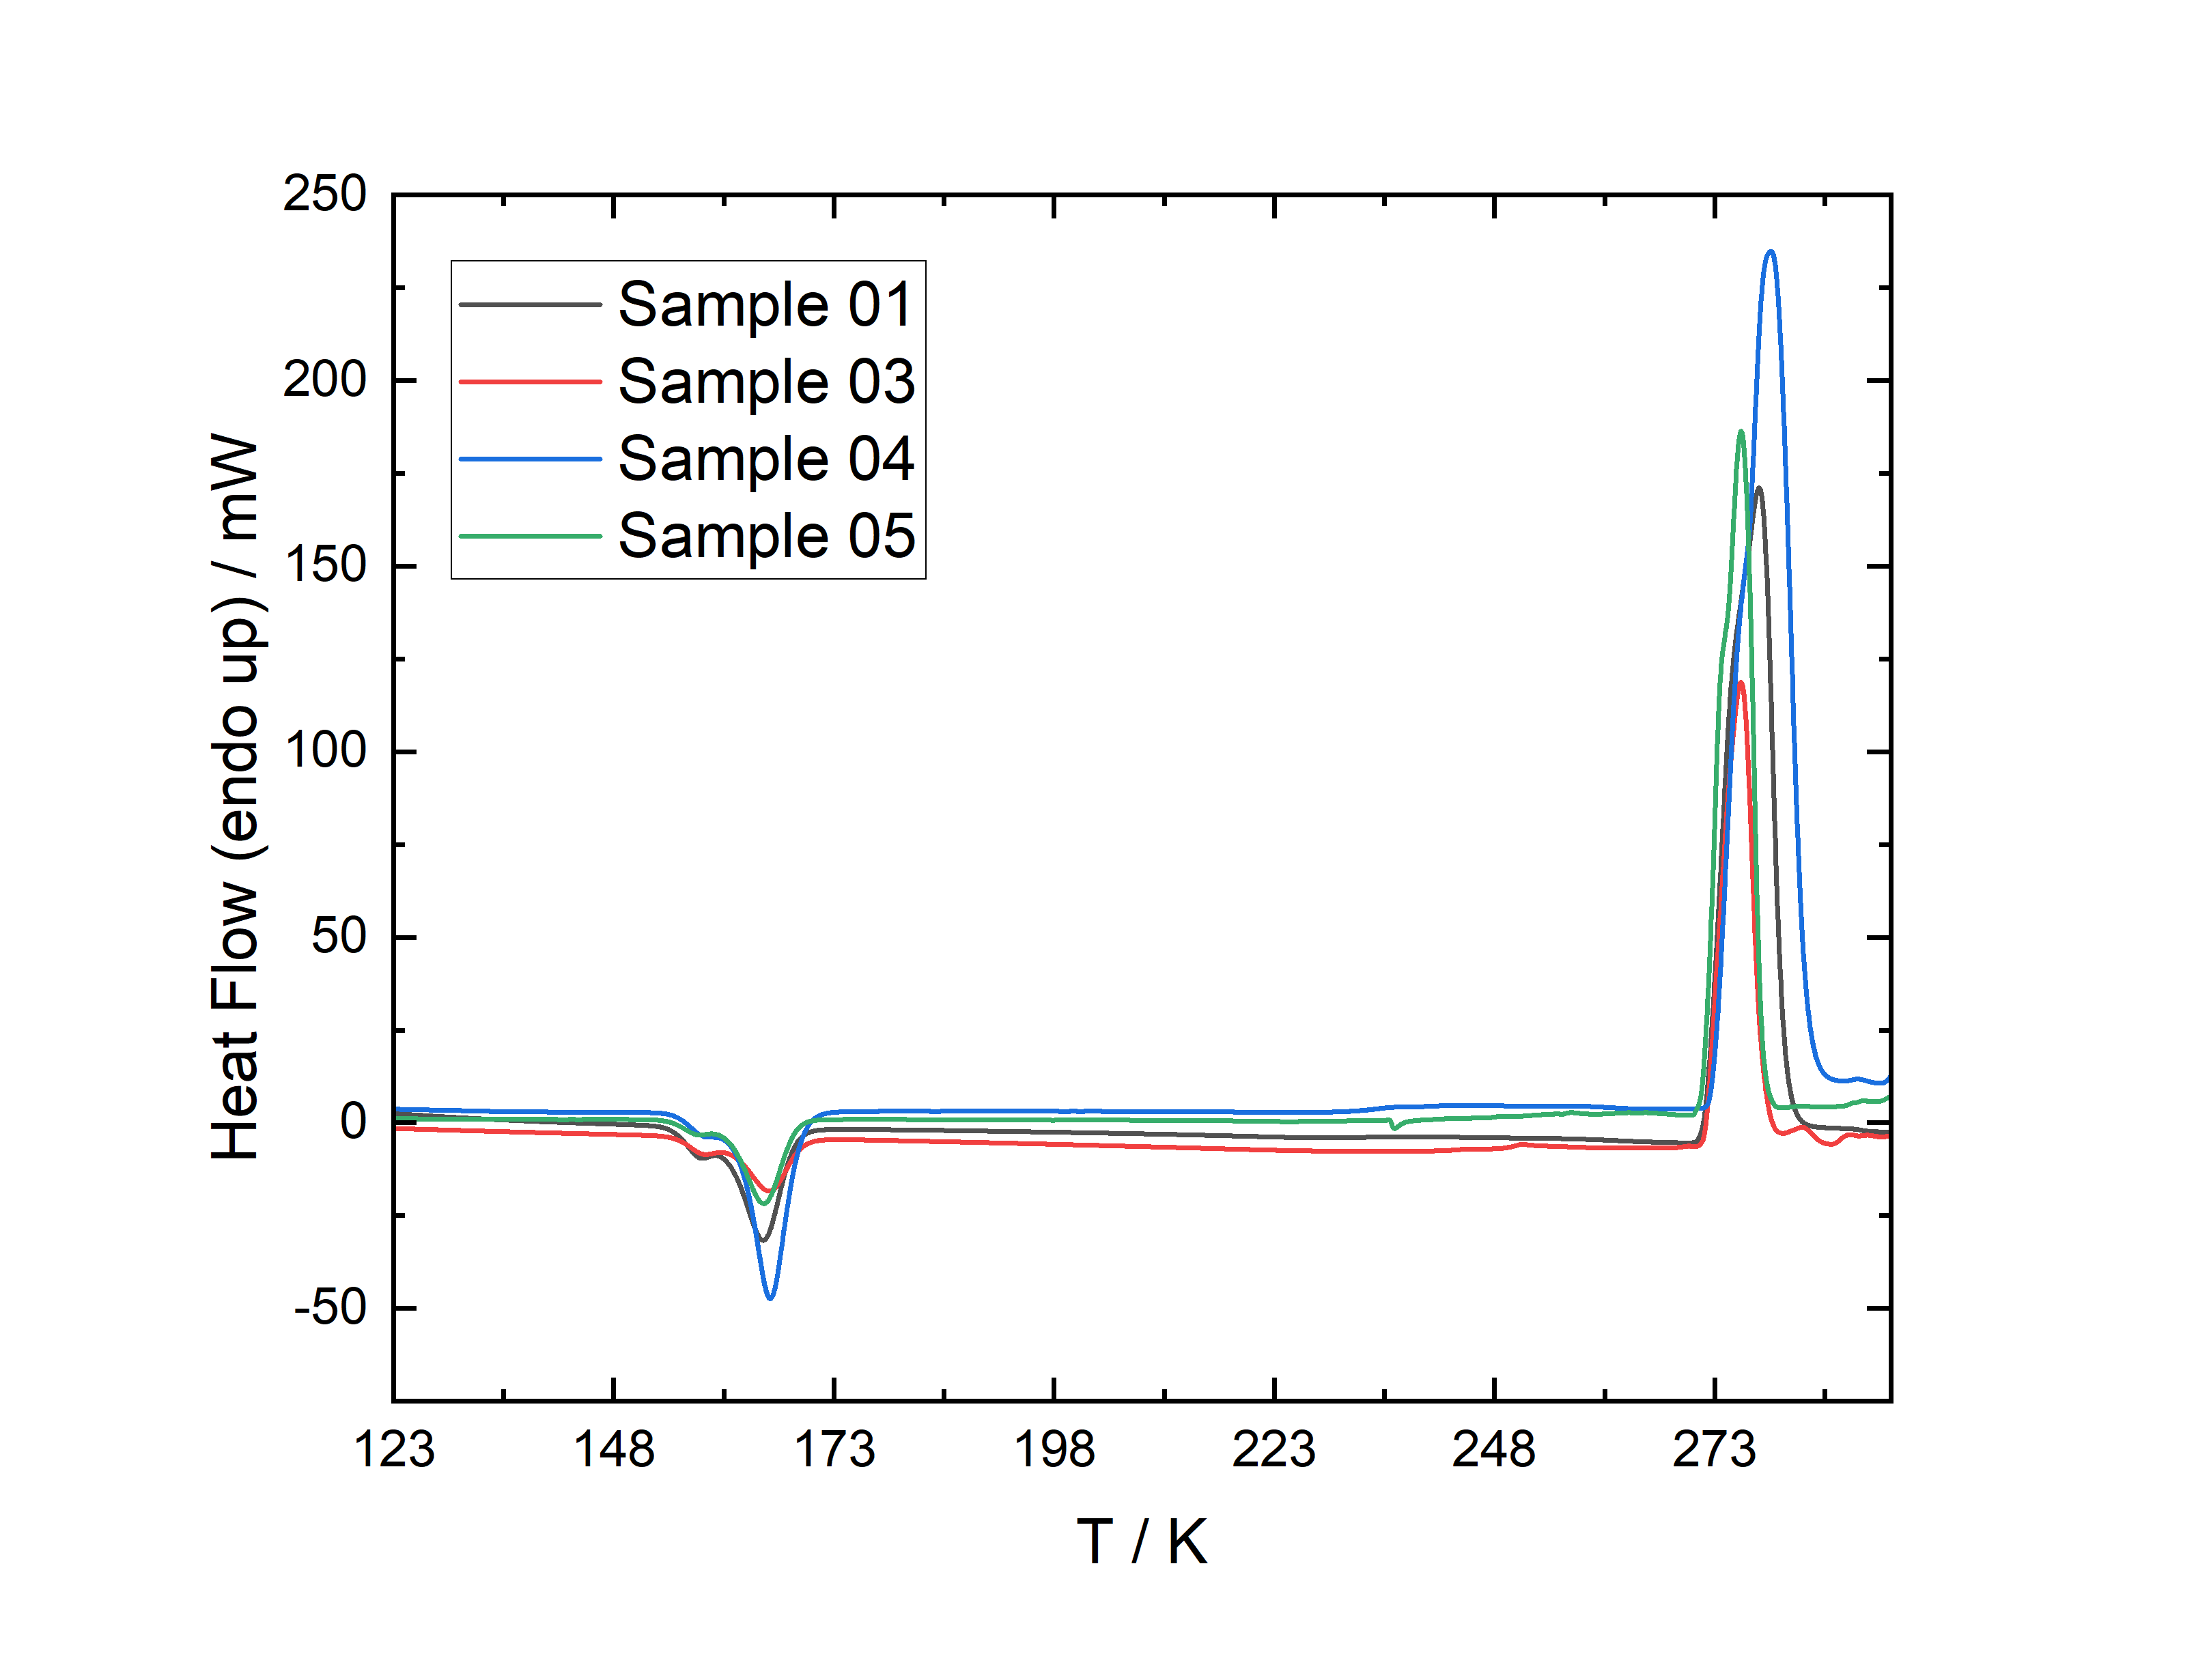


**Figure S2:** Raw DSC traces of HGW deposited on Cu grids. The samples were loaded at 90 K and heated to ambient temperature at 30 K min-1.

Figure S2 shows the DSC traces, all of which feature a large exotherm followed by a massive endotherm. Upon comparison to literature data4, the exotherm at 160 K is identified as the cold crystallization of HGW (vitrified droplets) to ice I. The endotherm at 273 K indicates the melting of ice I and represent the heat of fusion. The area of the exotherm indicates how much glassy water is present that crystallizes upon heating. The area of the endotherm indicates how much hexagonal ice is present that melts. Table S2 shows the transition enthalpies obtained by integration of the peaks in figure S2. By comparing the know enthalpy of fusion for ice I (6012 J mol-1)5 with the measured one, the amount of sample was calculated. By comparing the heat of cold-crystallization (as deduced from the area of the exotherm, in J/mol) with the literature value of -1330 J/mol4 for pure HGW the amorphicity was calculated.

**Table S2:** Heat of melting and heat of crystallization as determined from the DSC traces shown in figure S2. From these values, the amount of sample inside the crucible and the amorphicity were deduced. The error-bar of the amorphicity is ~ ±5 % based on repdroducibility studies by Kohl et al. (ref. 3).

|  | Heat of Fusion  / mJ | Heat of Cold Crystallization  / mJ | Sample Amount  / mmol | % amorphous | Heat of Cold Crystallization  / J mol-1 |
| --- | --- | --- | --- | --- | --- |
| Sample 01 | | 1972 | -385 | 0.328 | 88 | -1175 |
| Sample 03 | | 955 | -200 | 0.159 | 95 | -1257 |
| Sample 04 | | 2833 | -543 | 0.471 | 87 | -1152 |
| Sample 05 | | 1491 | -270 | 0.248 | 82 | -1090 |

As seen in table S2, the samples are still are largely amorphous even when hyperquenching directly onto the Cu grids.

# S3 Avoiding X-ray-induced Sample Changes

S3.1 Preventing Crystallization

To prevent X-ray induced damage to the sample, the incident free electron pulses were attenuated. However, strong attenuation lowers the signal to noise ratio (S/N). To find the optimal transmission setting, the attenuation was lowered stepwise (see figure S3) while observing the WAXS intensity *I(q)*. Up to a transmission of 9.5 * 10-4, a pronounced halo peak centered at a momentum transfer *q* of 1.7 Å-1 is observed. This indicates that the sample is amorphous and LDA-like6. Apart from this halo peak, a few tiny Bragg-peaks indicate contamination with stacking disordered ice I7, consistent with the characterization by calorimetry in section S2. After increasing the transmission to 4.85 * 10-3, the sample crystallized fully which is indicated by the absence of the halo peak, but presence of pronounced Bragg-peaks of hexagonal ice I7. The S/N ratio is easily sufficient down to a transmission of 6 * 10-5, while for a transmission of 1 * 10-5 artifacts start to appear (e.g., at 2.1 Å-1). To prevent beam damage and to ensure a good S/N ratio, the transmission was set to 4.6 * 10-4 or lower for the actual measurements.


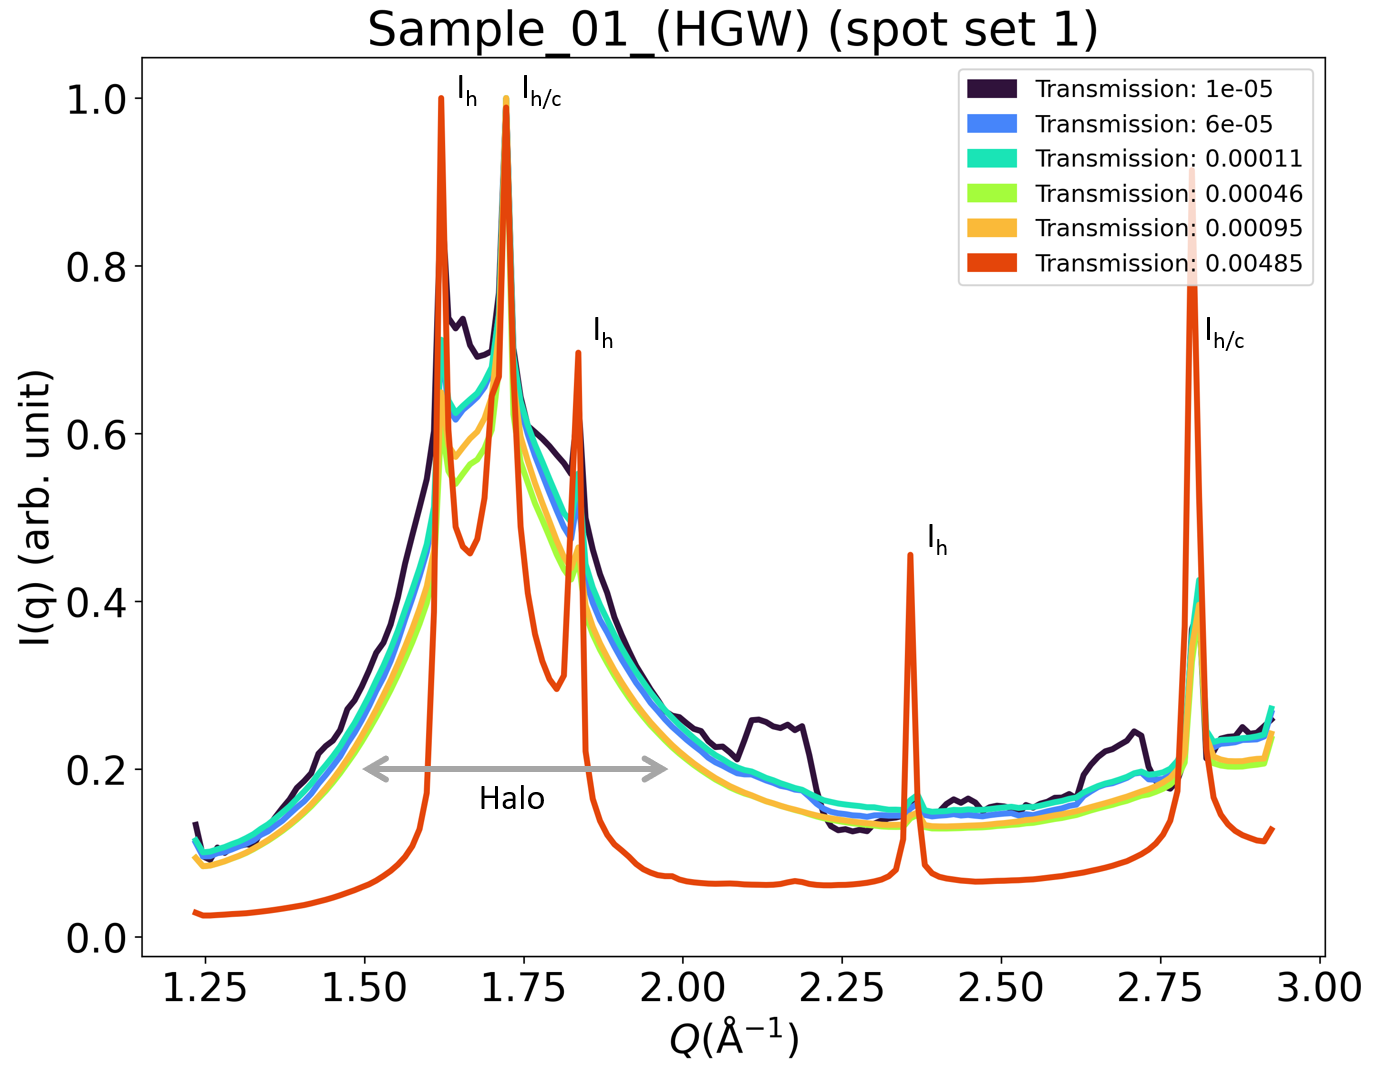


**Figure S3:** WAXS I(q) (intensity as a function of the momentum transfer q) for different transmission settings (see legend). For comparability, the curves were normalized to their respective maximum. Bragg-peaks of ice Ih and ice Ic are marked accordingly.

S3.2 Excluding X-ray Induced Coalescence

As stated in the main text, the reduced pulse energy (i.e., the pulse energy after attenuation) was ~140 nJ (4.6 * 10-4 * 300 µJ) which converts to a fluence of 0.2 mJ mm-2 (26x26 µm beam) or 0.6 mJ mm-2 (15x15 µm beam). Thus the fluence is still below values relevant for X-ray induced heating of water.8 To exclude the possibility of X-ray induced effects, we compare the single pulse data (sample 05) with the 10 Hz static data (other samples). For the single shot data (colored green in Figure S4), only the 1st pulse of each train consisting of 16 pulses was used for evaluation. After each train, the spot was changed which means that the single pulse data in figure S4 (and most of the data in the main text) corresponds to single shots at a fresh sample spot but averaged over all spots. Due to the low fluence, using these single shots excludes the possibility of any beam-driven effects. Furthermore, no systematical difference between the single-shot and the static data are visible in figure S4. This shows that even the static 10 Hz data that was taken at single spot, displays no sign of beam-induced coalescence.


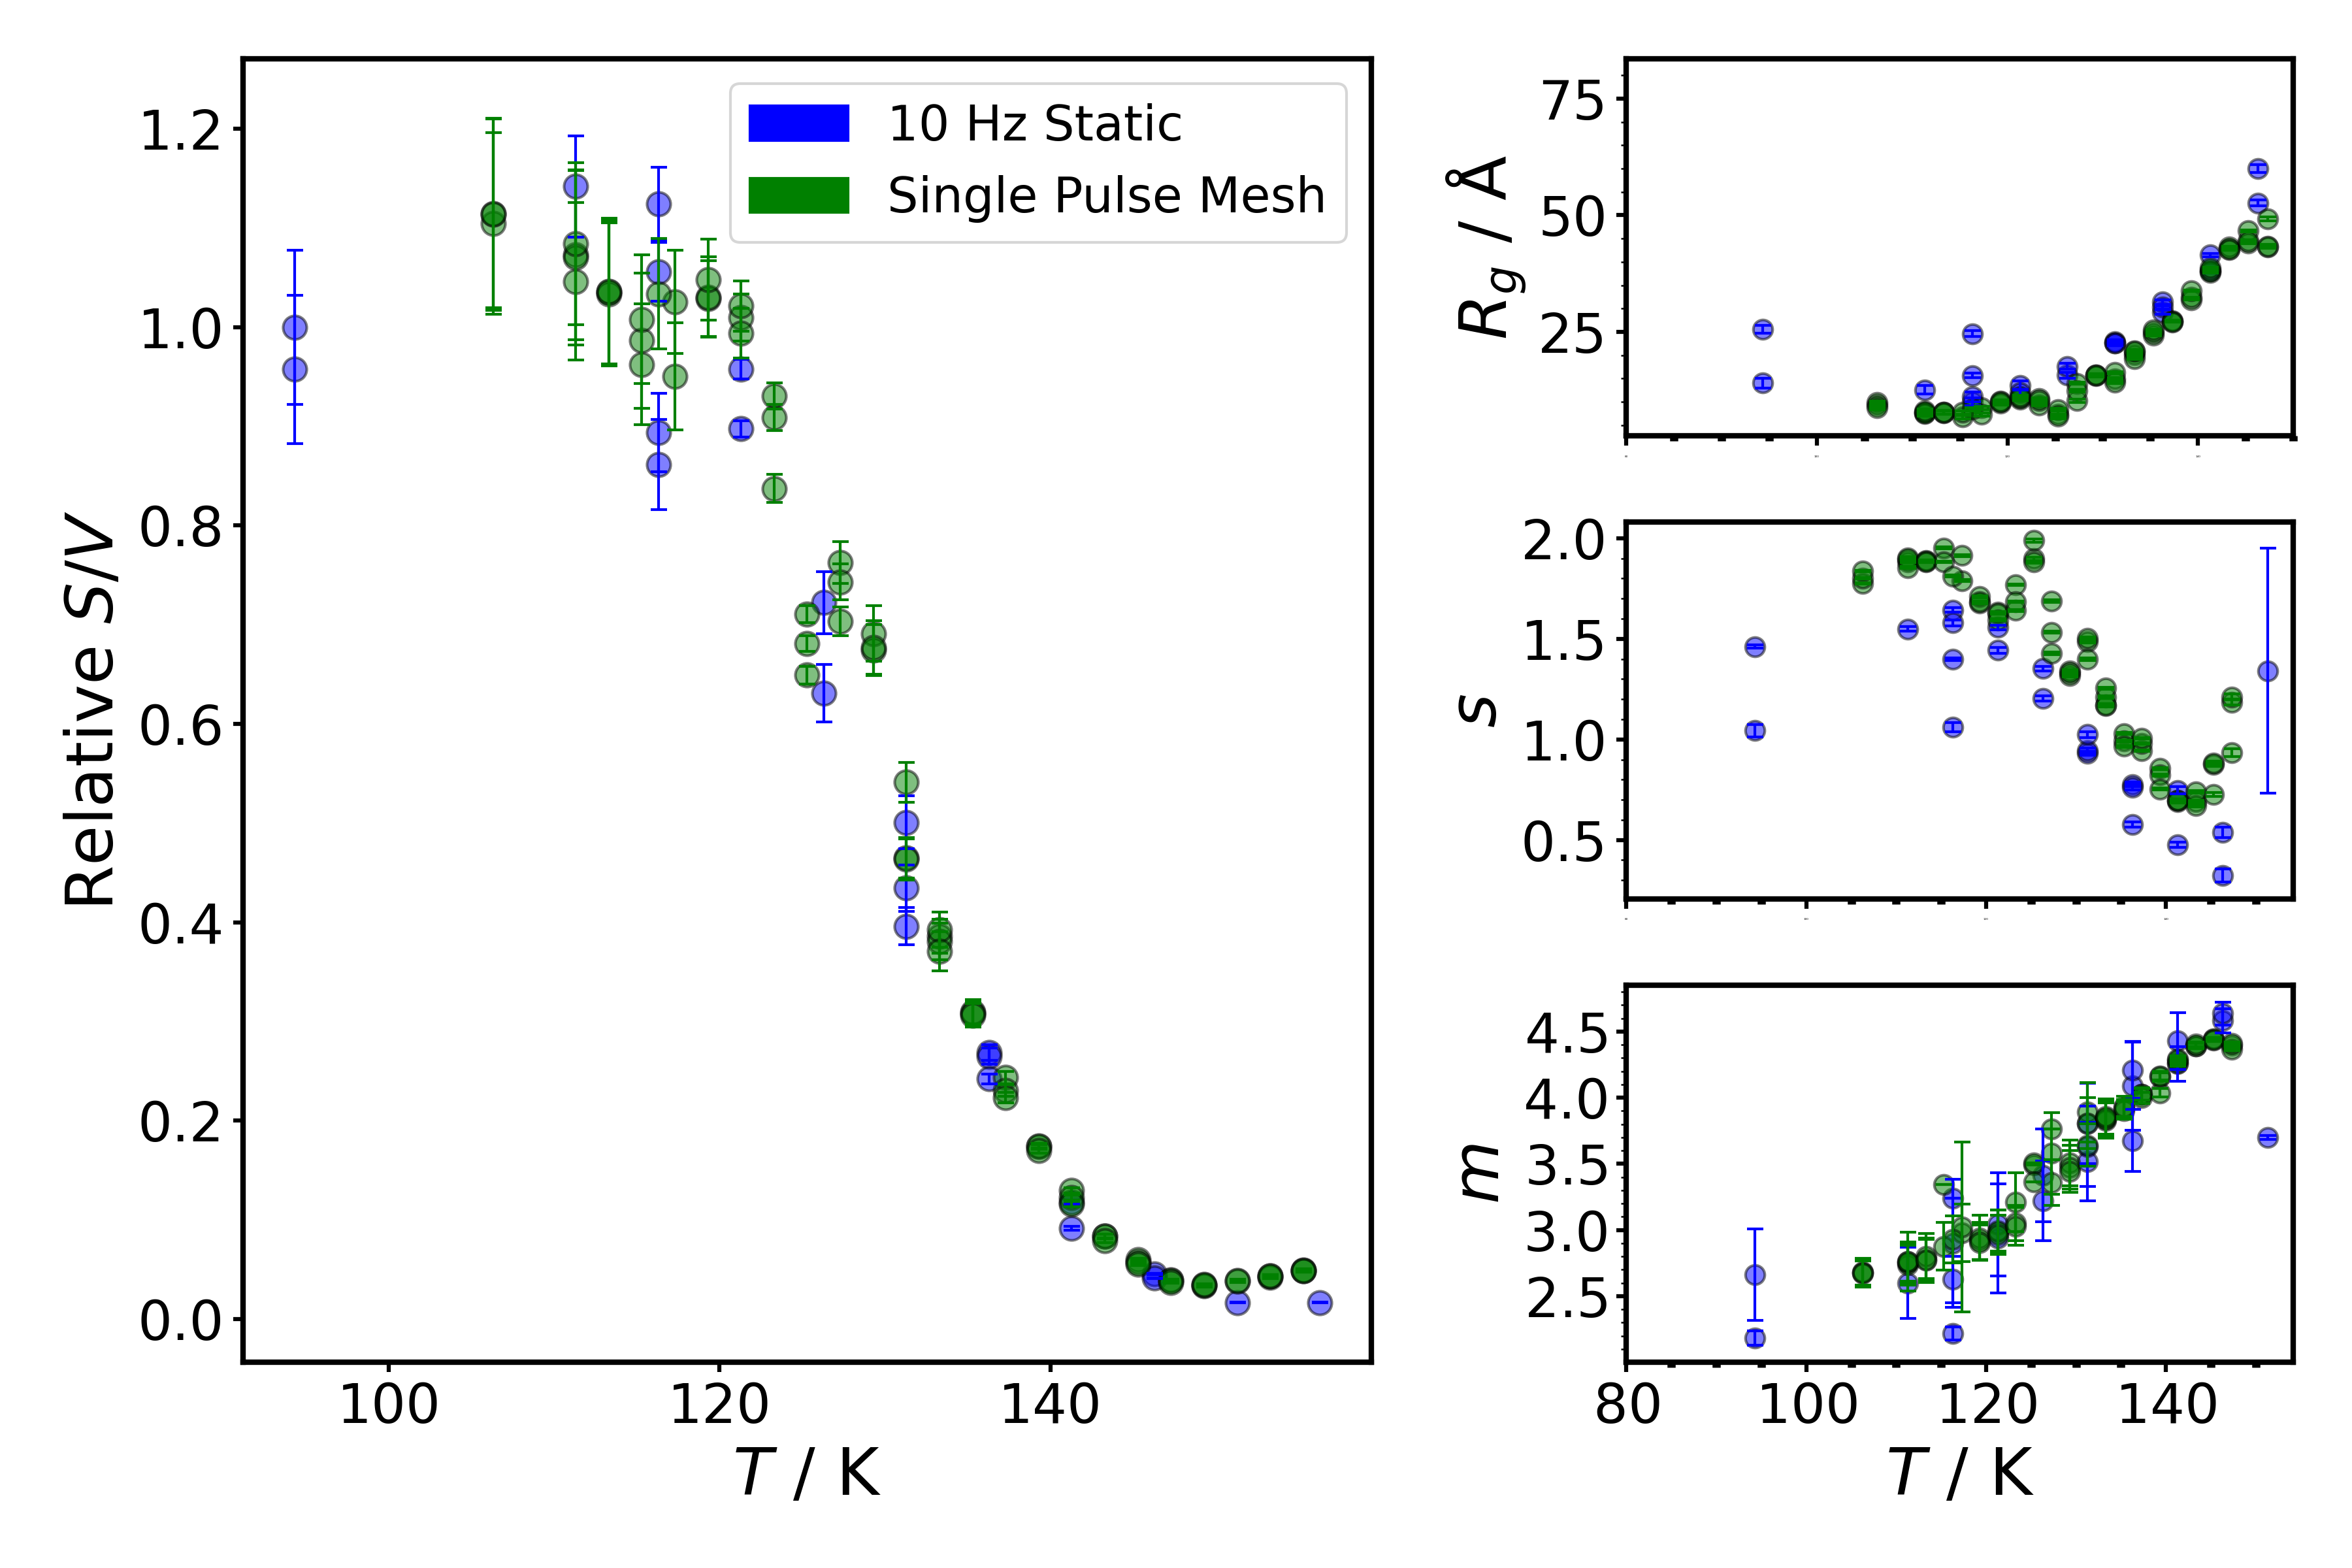


Figure S4: Relative S/V as shown in figure 2 in the main text but comparing between single-shot and static measurements.

# S4 Temperature Correction

S4.1 Temperature Correction for SAXS

For SAXS the sample inside the grid is squeezed by copper door that is itself mounted at the bottom of the JANIS cryostat and then evacuated. The SAXS sample environment employed typically shows an offset between nominal and true sample temperature. To assess this offset the WAXS data were used and compared to literature values. The onset crystallization temperature of HGW is 156.3 ± 0.5 K according to Bachler et al.1 at a heating rate of 10 K min-1 based on calorimetry data. We here observe crystallization under isothermal conditions (step-wise heating; average heating rate ~5-10 K h-1) at a nominal temperature 140 K based on the formation of pronounced Bragg peaks of ice I in the WAXS data along with the vanishing of the halo peak of LDA (see figure S5). By comparing the observed crystallization temperature with the literature value, we estimate an offset of ~16 K, i.e., the true temperature is 16 K higher than the nominal temperature inside the mounted grids. All data shown in the main text and in section S6 have been corrected for this offset. The second transformation that can be used to calibrate is the polyamorphic transition which also results in an offset of ~16 K (see section S5).


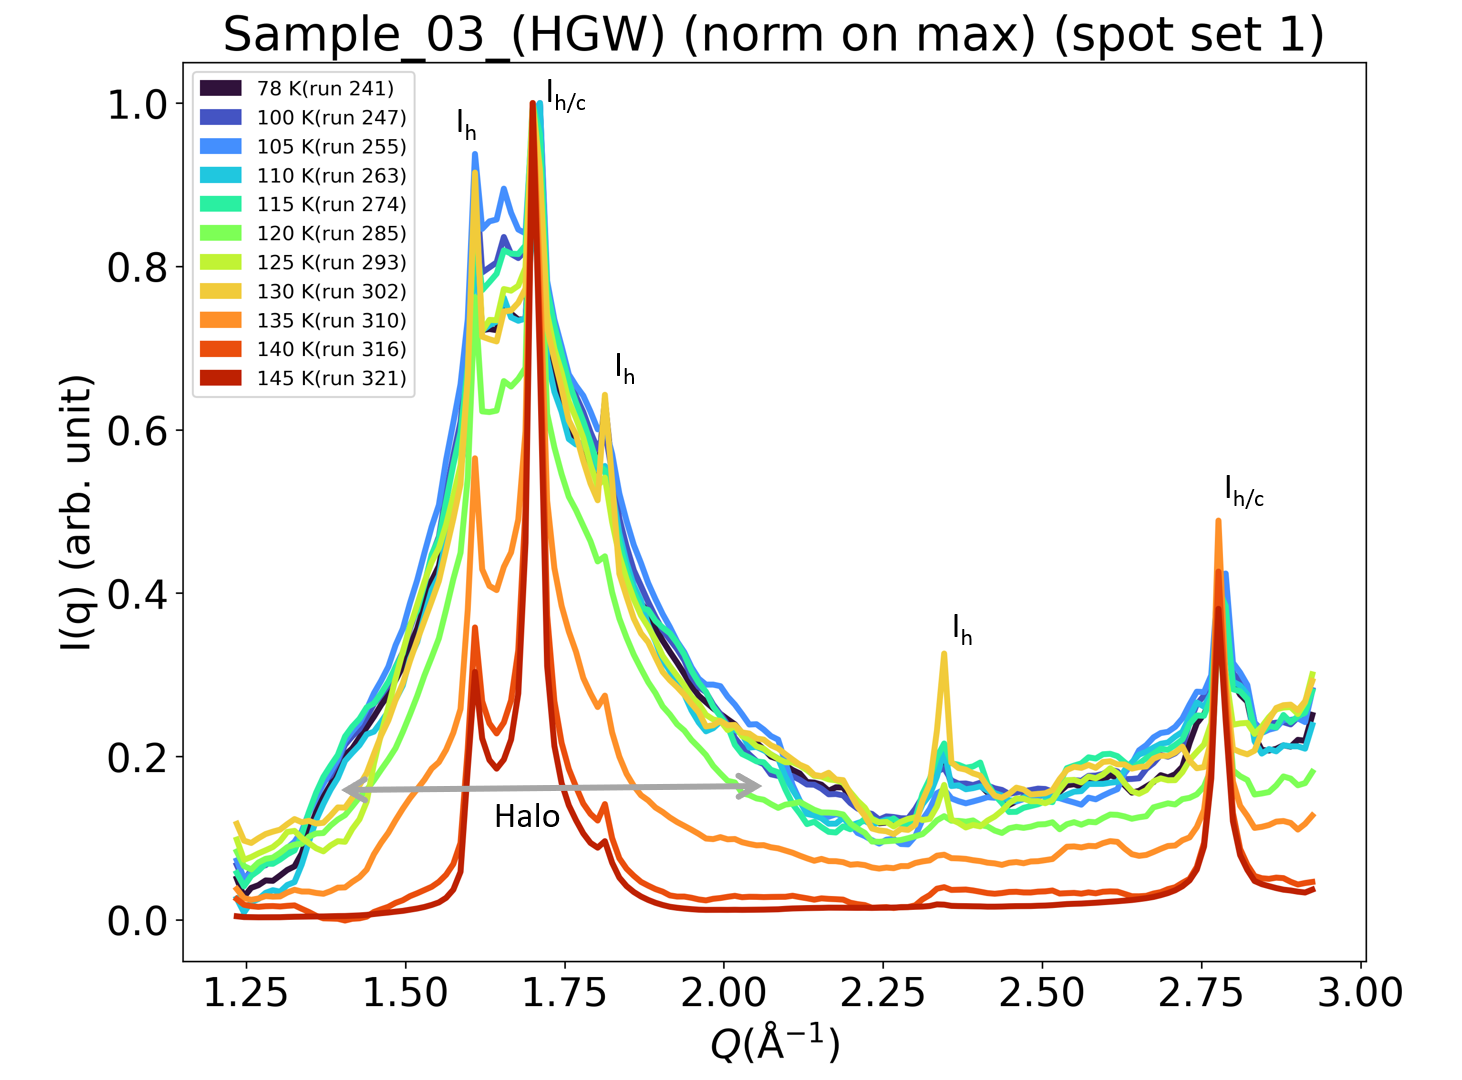


**Figure S5:** WAXS I(q) (intensity as a function of the momentum transfer q) for HGW for different temperatures. The temperatures shown are not offset-corrected (see text). The label ‘spot set 1’ indicates that the data shown corresponds to the first spot that was measured after each temperature increase.

S4.2 Temperature Correction for SEM

The SEM sample environment is known to show nominal temperatures that are higher than the true temperature, i.e., the offset has a negative sign. A similar procedure as described in section S4.1 has been used to estimate this offset. Crystallization was observed at 171 K. Comparing this value to the literature value of 156.3 ± 0.5 K 1 leads to an estimated offset of ~ -15 K. The SEM data shown in the main text and in section S6 were corrected for this offset.

# ****S5 Wide Angle X-ray Scattering (WAXS)****

The following figures (S6-S8) show the WAXS intensity (simultaneously recorded with the SAXS signal) as a function of the momentum transfer *q*. WAXS calibration was carried out using LaB6. The 2D data recorded on the detector were integrated azimuthally using the data analysis tool DAMNIT. The integrated scattering profiles were normalized to the maximum value in the observation range for better comparability. Temperatures were corrected for the offset which is 16 K for the SAXS/WAXS measurements (see section S4.1). The WAXS data are only available for the static 10 Hz experiments. They are shown for various spots where ‘spot set 1’ corresponds to the first spot that has been measured after temperature increase and ‘spot set 2’ to the second one.


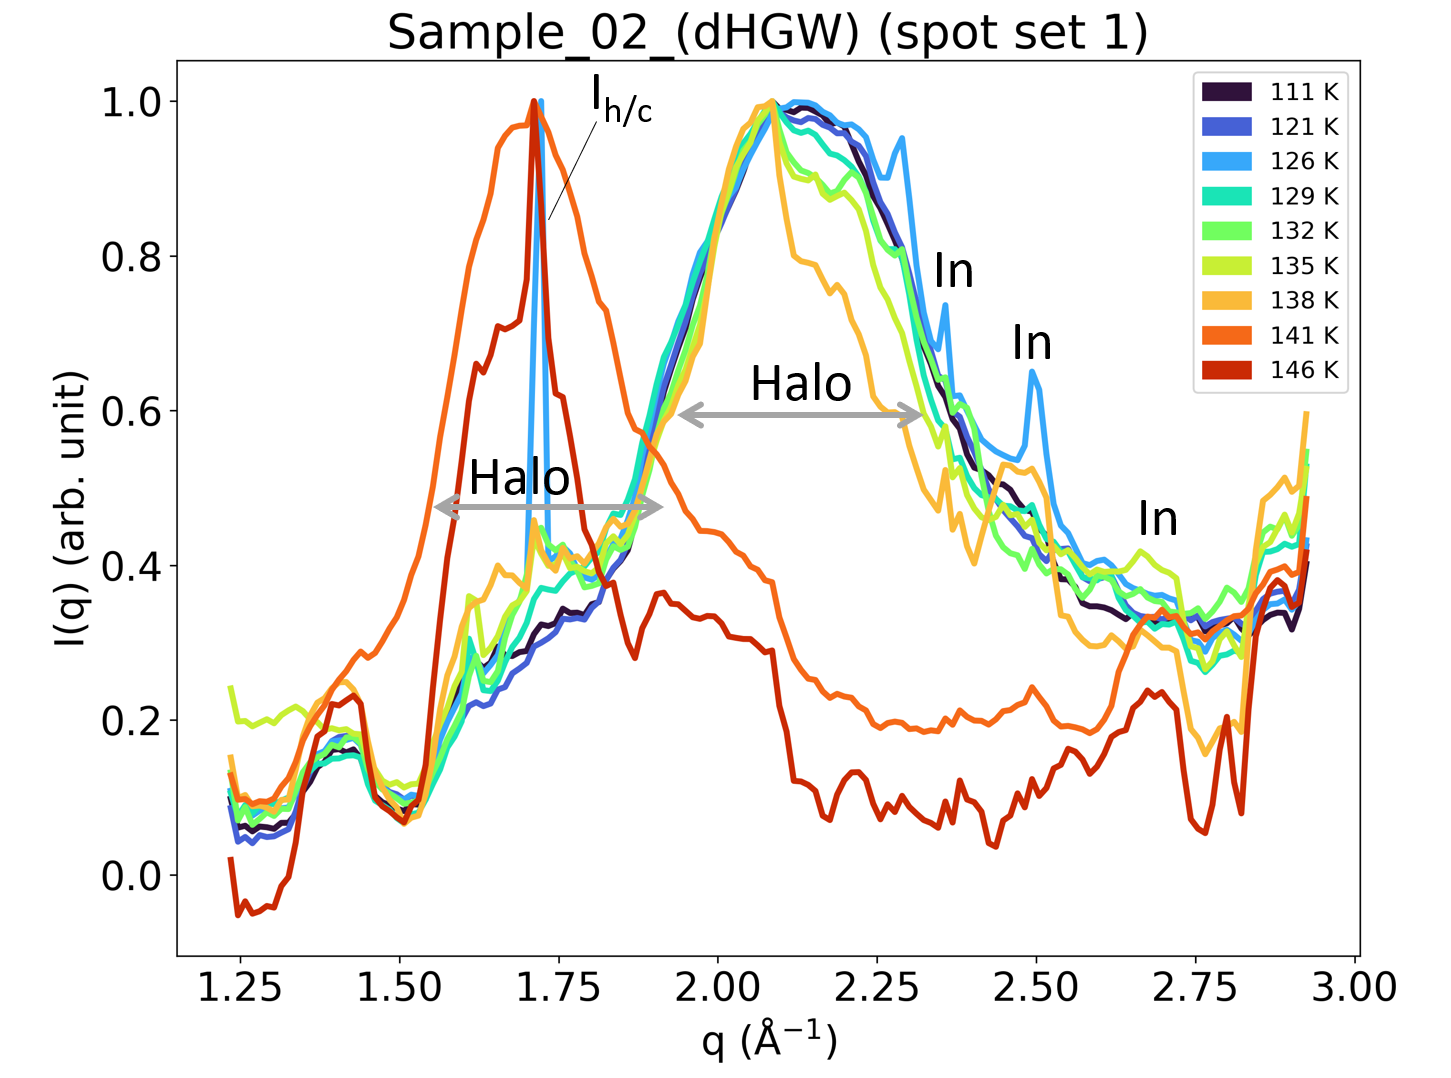

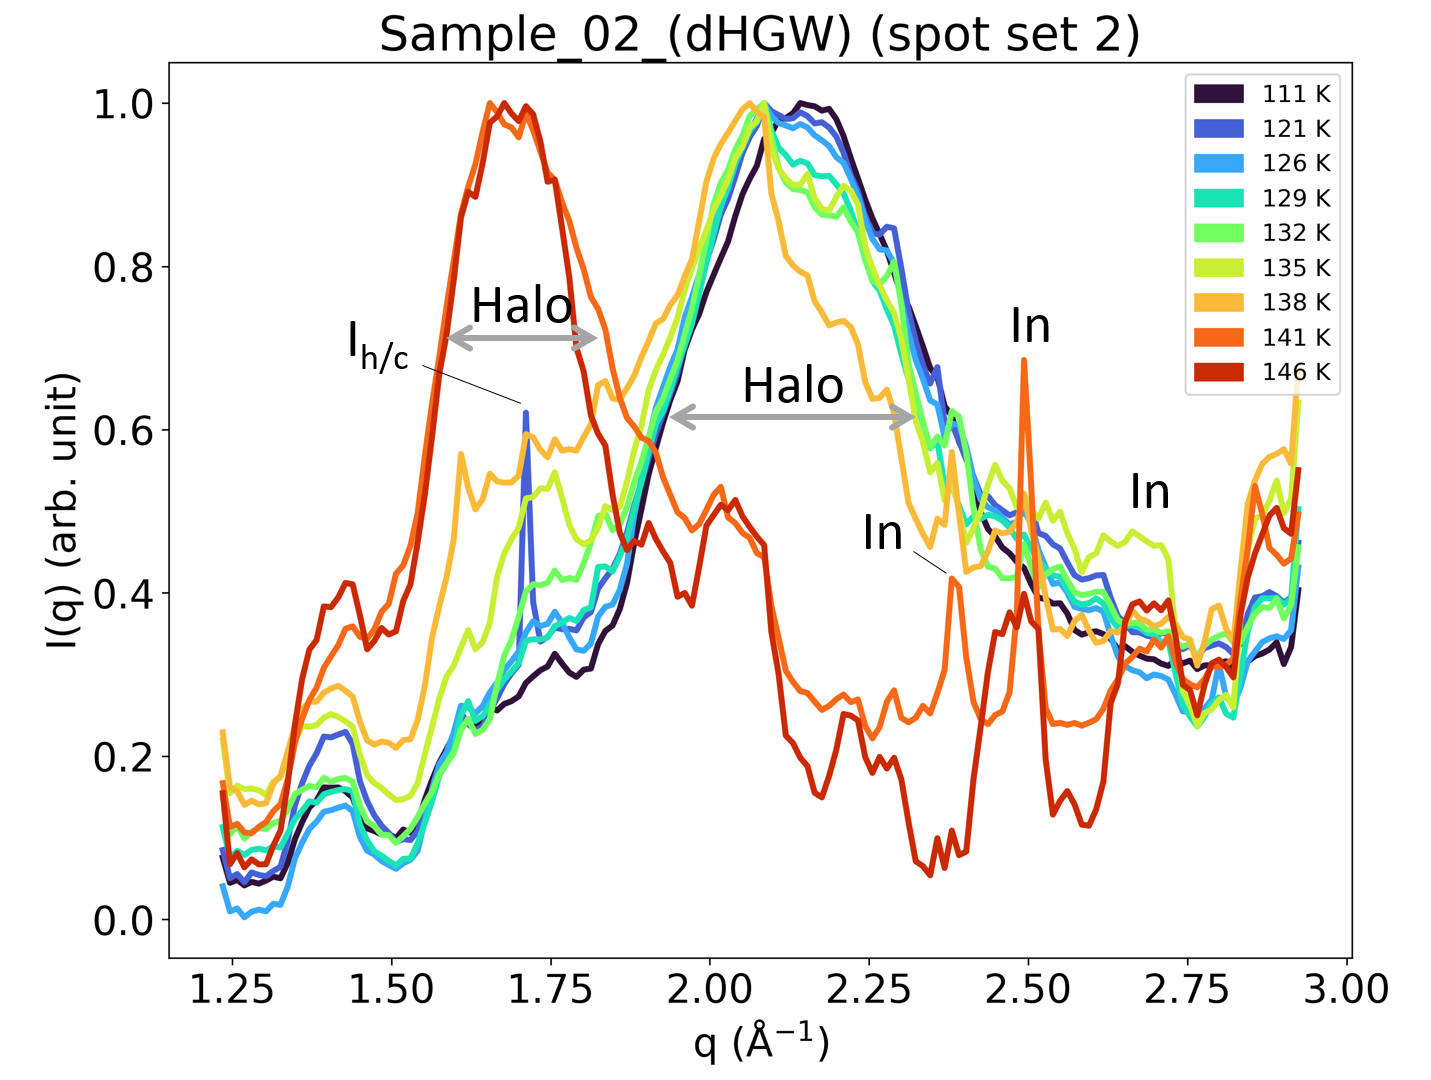


**Figure S6:** WAXS data for dHGW (HDA) for different temperatures and spots. Bragg peaks originating from ice I (hexagonal Ih and cubic Ic) and indium (In) are marked accordingly. The data are normalized with respect to each maximum.

Figure S6 shows the WAXS data for dHGW (called HDA in the main text). The data are rather noisy due to the large attenuation that had to be used to prevent beam damage. Besides small amounts of crystalline contamination of cubic ice (Bragg peak at 1.7 Å-1), the sample is identified as a high-density amorphous type of ice based on the halo peak centered at 2.2 Å-1 as observed in earlier scattering studies9. Additionally, there is a shoulder at 1.7 Å-1 which likely indicates the presence of low-density domains10. Upon stepwise heating with an average rate of 5-10 K h-1, the position of the maximum of the halo peak shifts to 1.7 Å-1 at a temperature of 141 K, indicating the formation of low-density amorphous ice from dHGW1,9. This transition temperature is consistent with literature11 (heating rate 30 K min-1), confirming the assessment of the temperature offset.


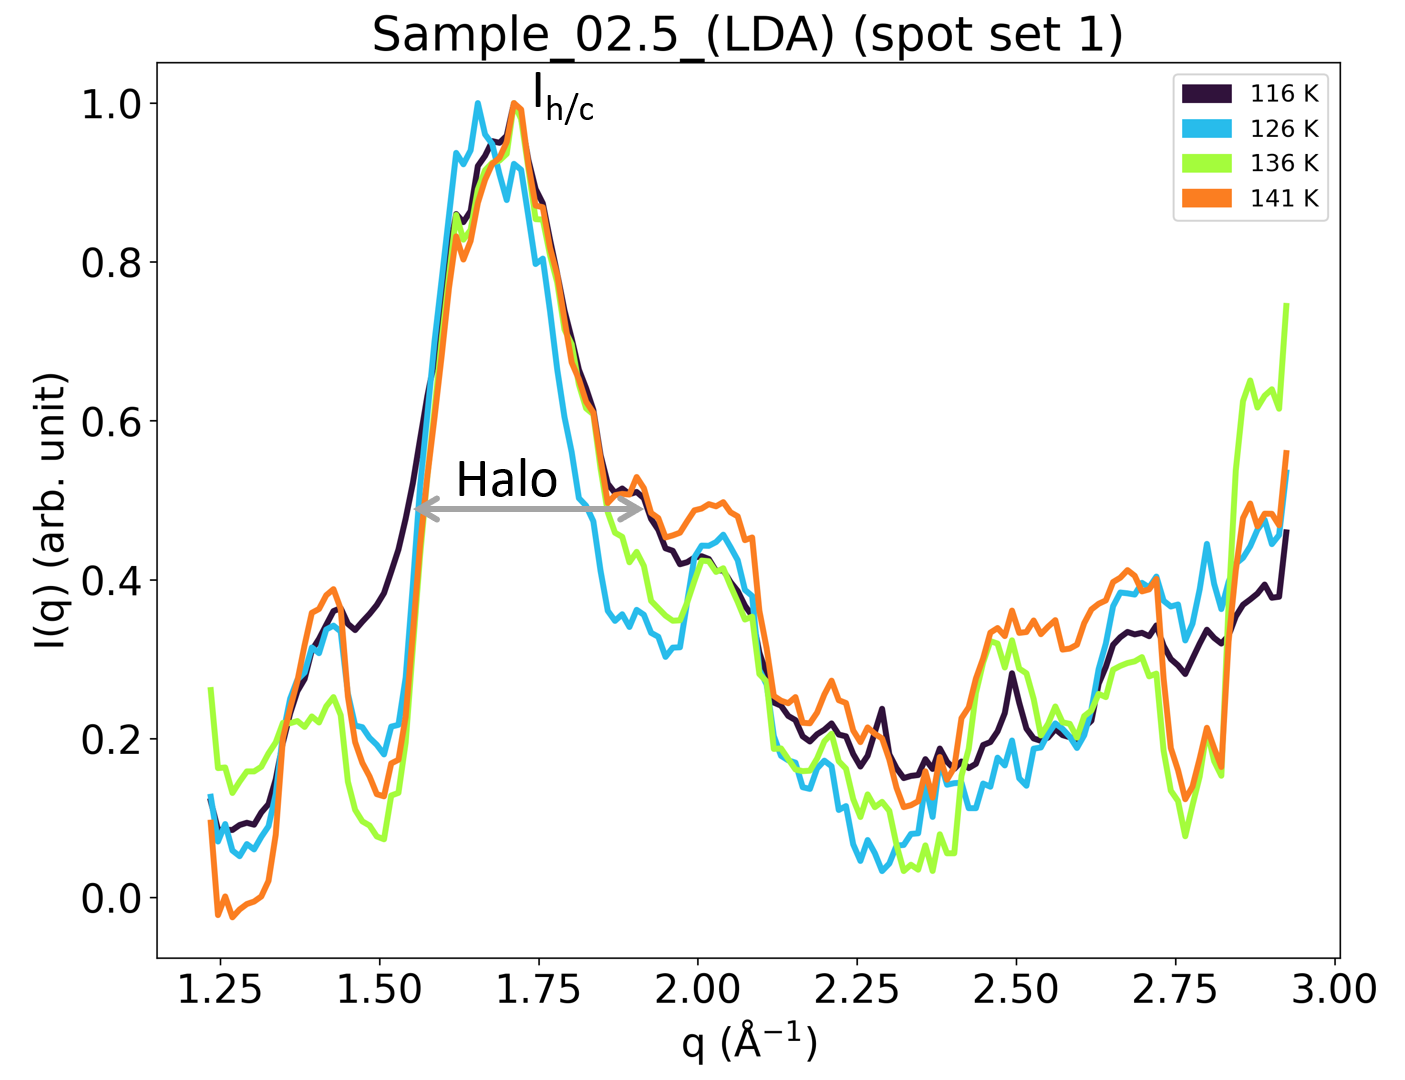


**Figure S7:** WAXS data for LDA made in situ from dHGW for different temperatures and spots. Peaks are marked accordingly. The data is normalized with respect to each maximum.

After the polyamorphic transition of dHGW (sample 02) to LDA, it was recooled (= sample 02.5). As seen by the halo peak centered at 1.7 Å-1 in figure S7, the LDA stayed amorphous at all temperatures up to 141 K.

Figure S8 shows the WAXS data for the HGW samples at different temperatures and spots. At temperatures below 156 K, a pronounced halo peak centered at 1.7 Å-1 is observed for all samples, confirming the low-density amorphous nature of the HGW samples. Additionally, contaminations of stacking disordered and hexagonal ice I are found as indicated by the corresponding Bragg peaks. Contamination of stacking disordered ice I typically forms during hyperquenching while hexagonal ice I usually forms by condensation of water vapor from the atmosphere during sample handling. Crystallization occurs at 156 K, where the sample fully transforms to stacking disordered ice I.


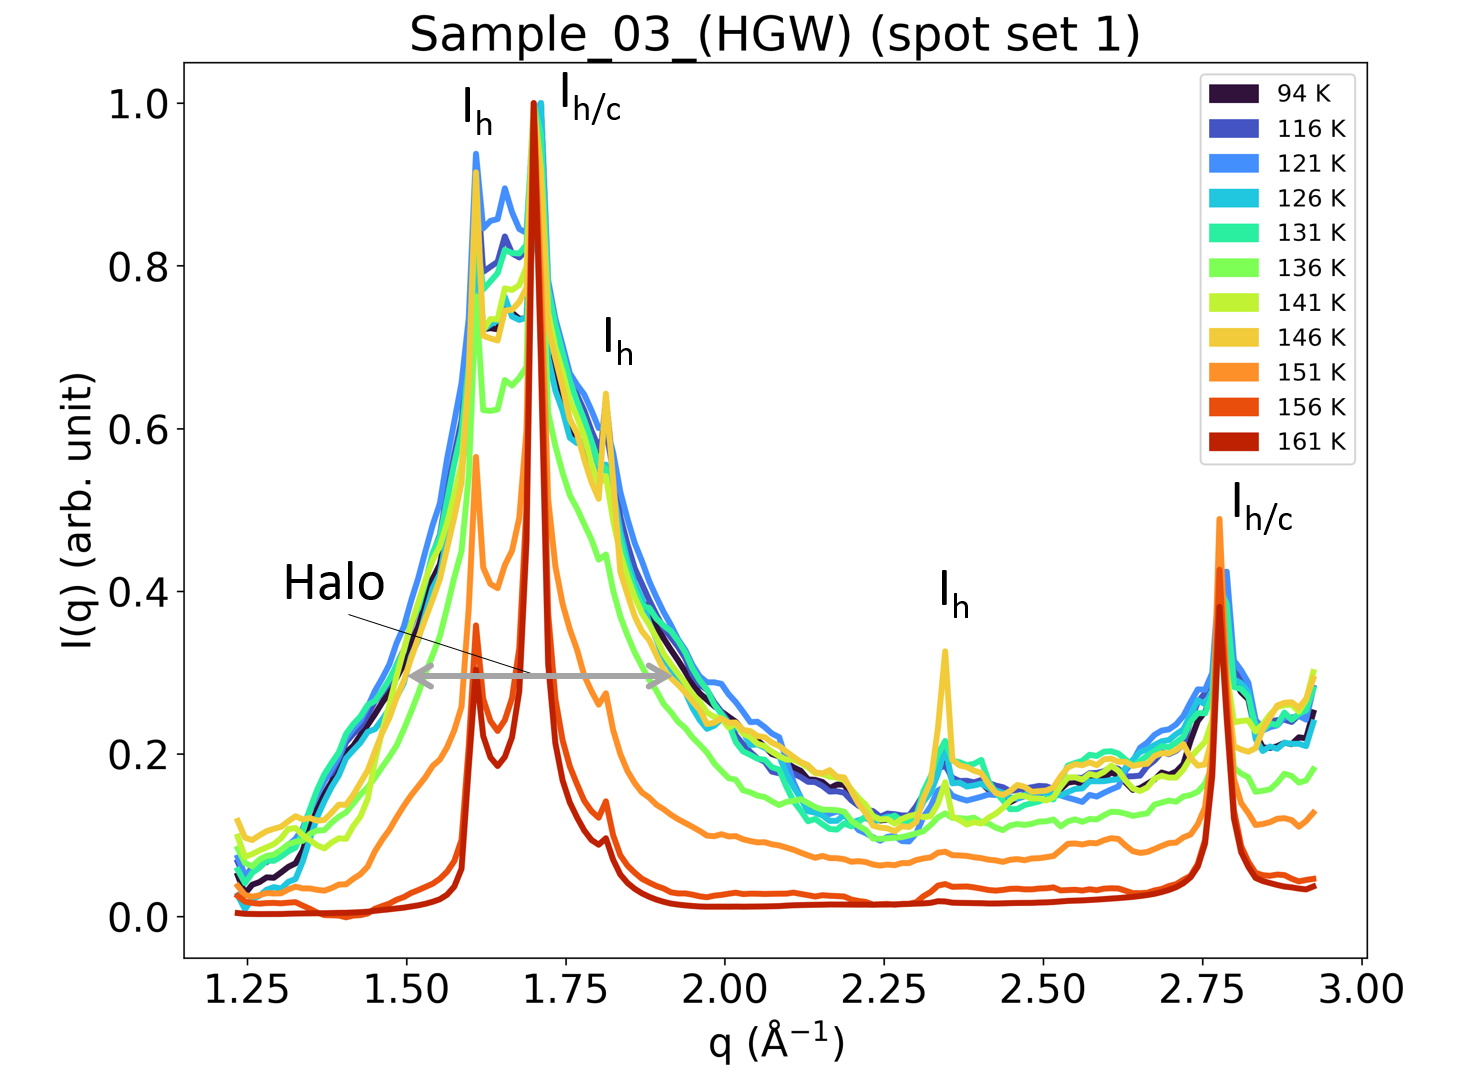

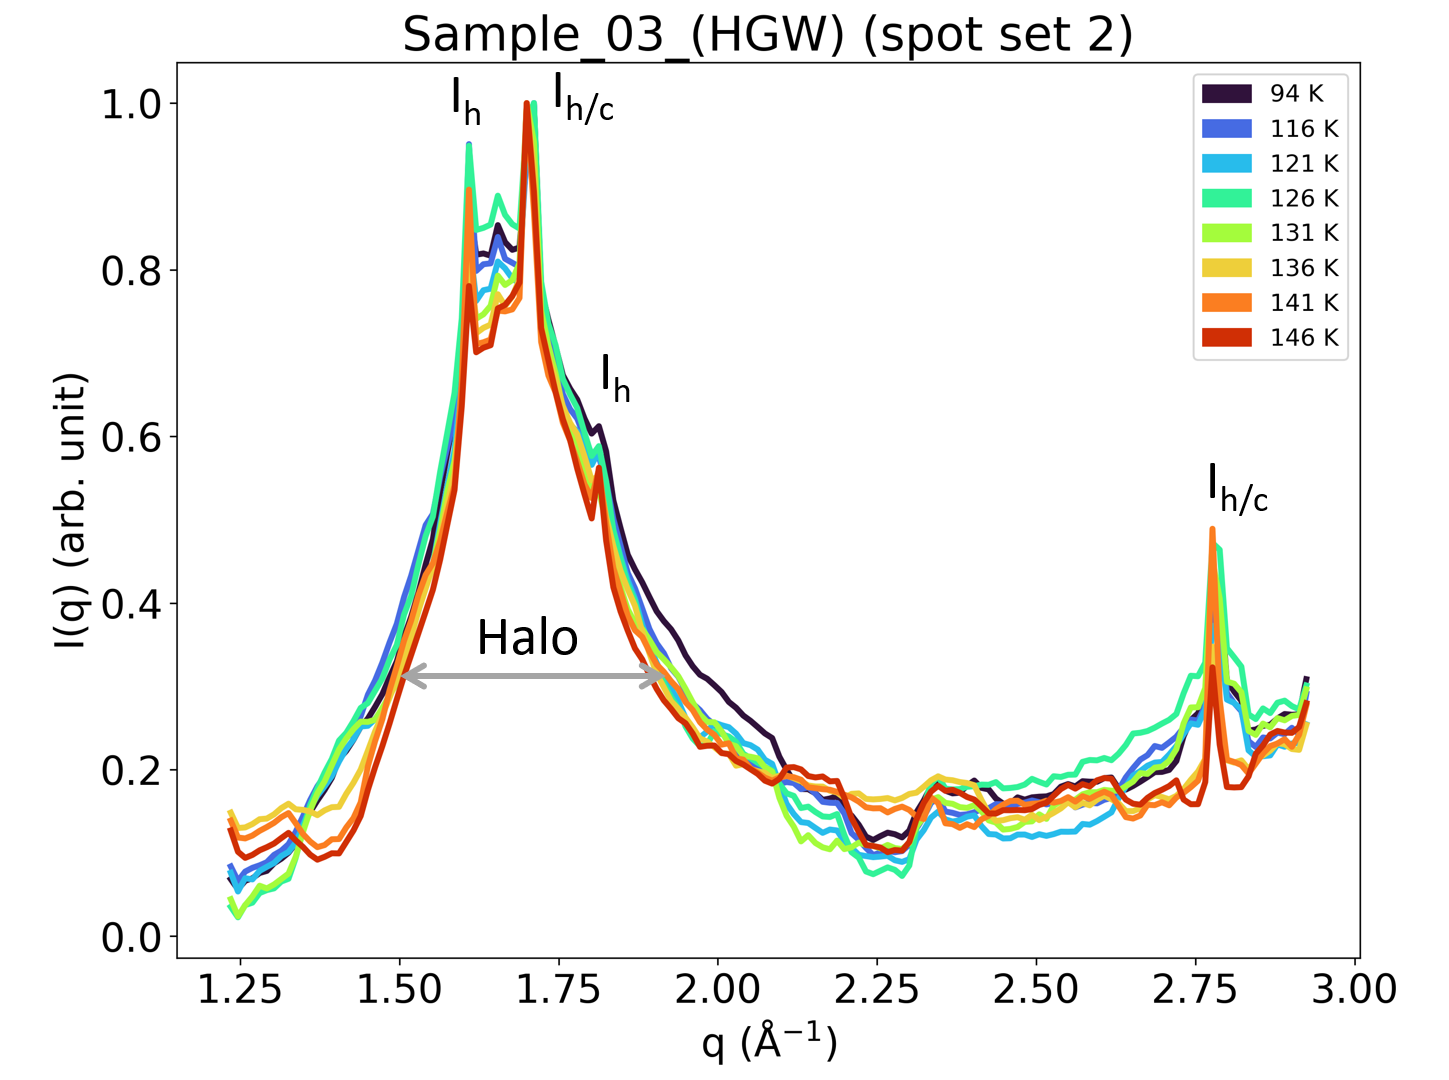

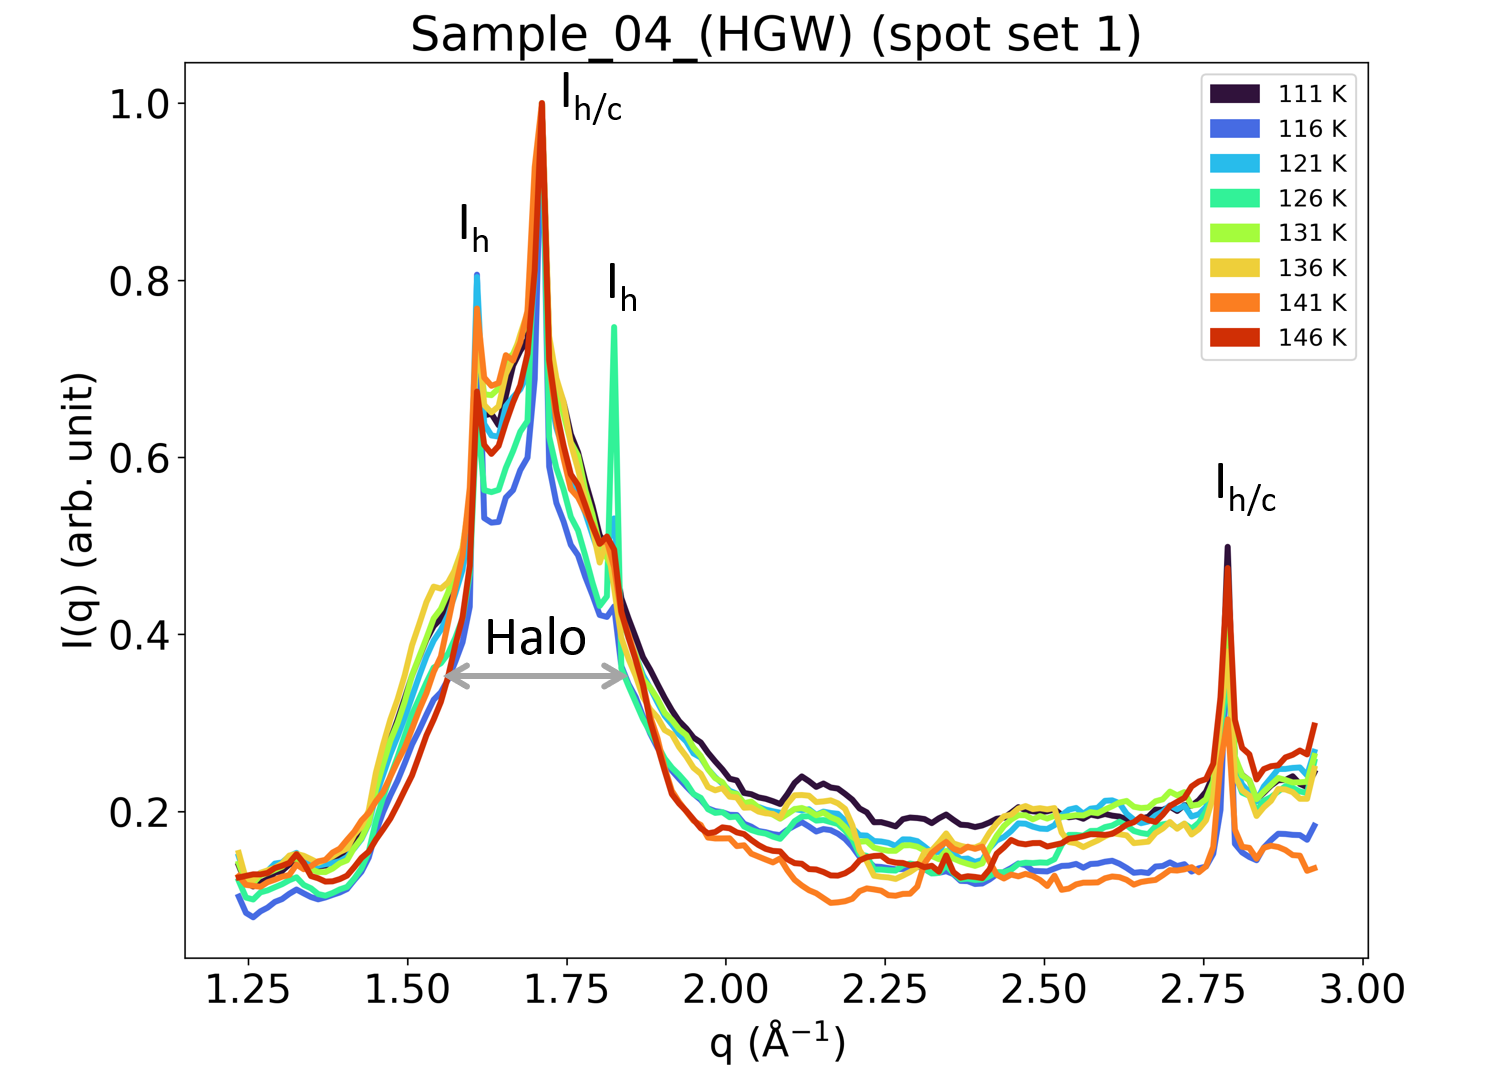

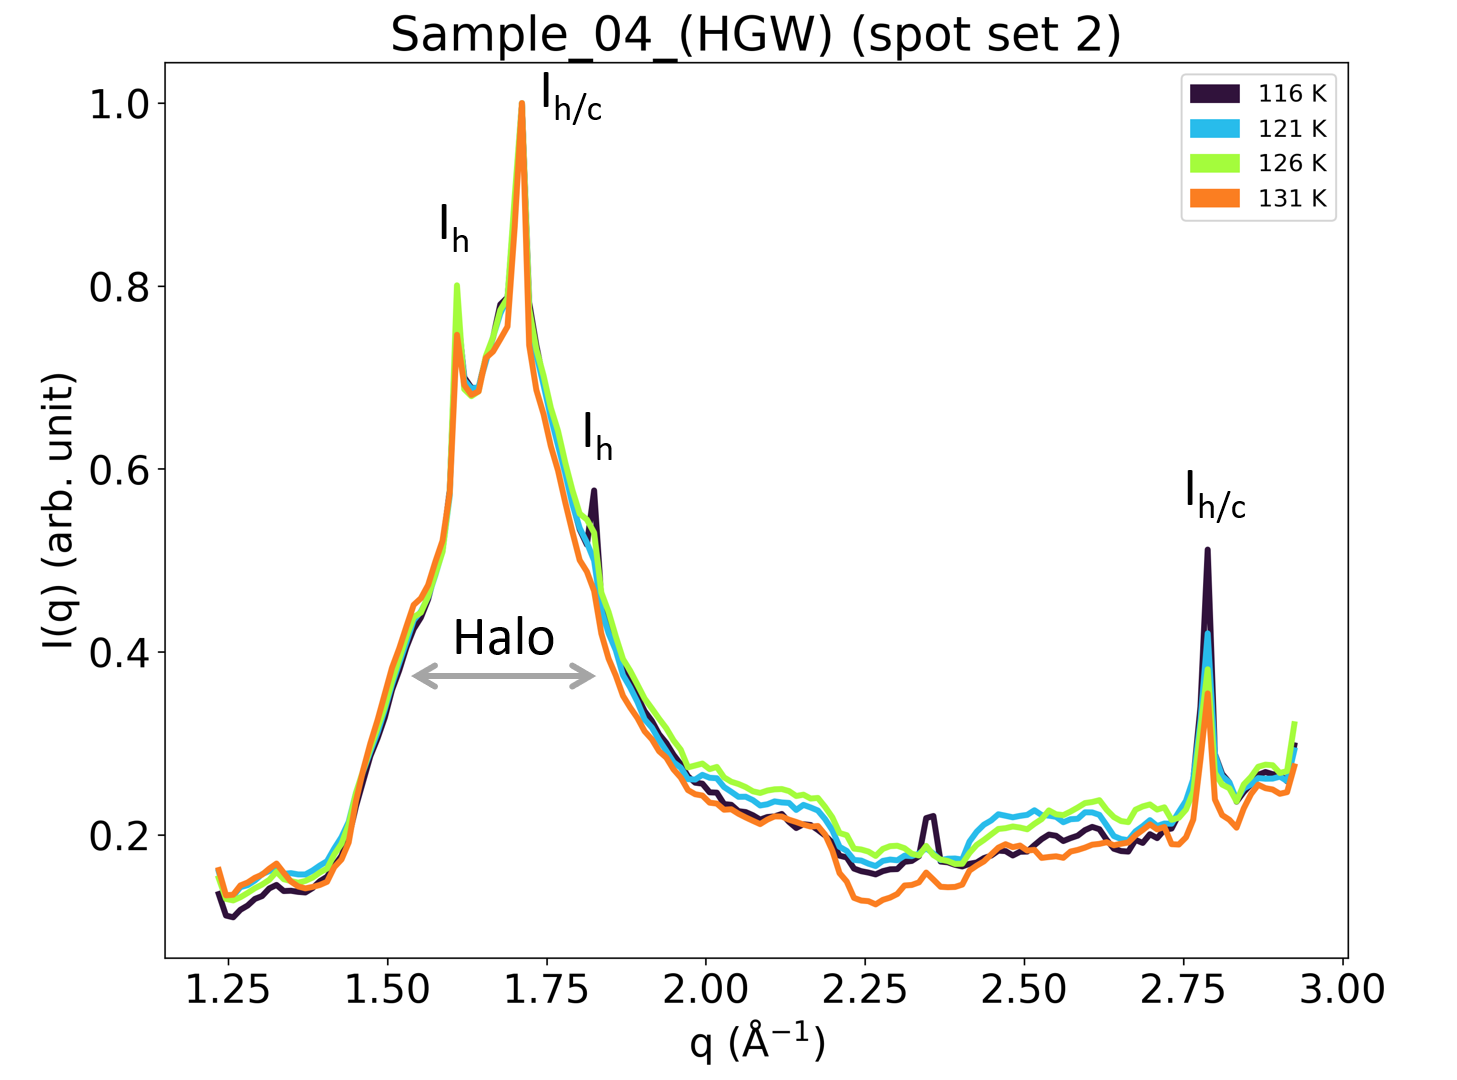


**Figure S8:** WAXS data for HGW for different temperatures and spots. Bragg peaks are caused by contamination with ice I and are marked accordingly. The data are normalized with respect to each maximum. Due to a change in the setup during the beamtime at MID2, no WAXS data are available for sample 05.

# S6 Supplemental SAXS Data

S6.1 Raw I(q) Data


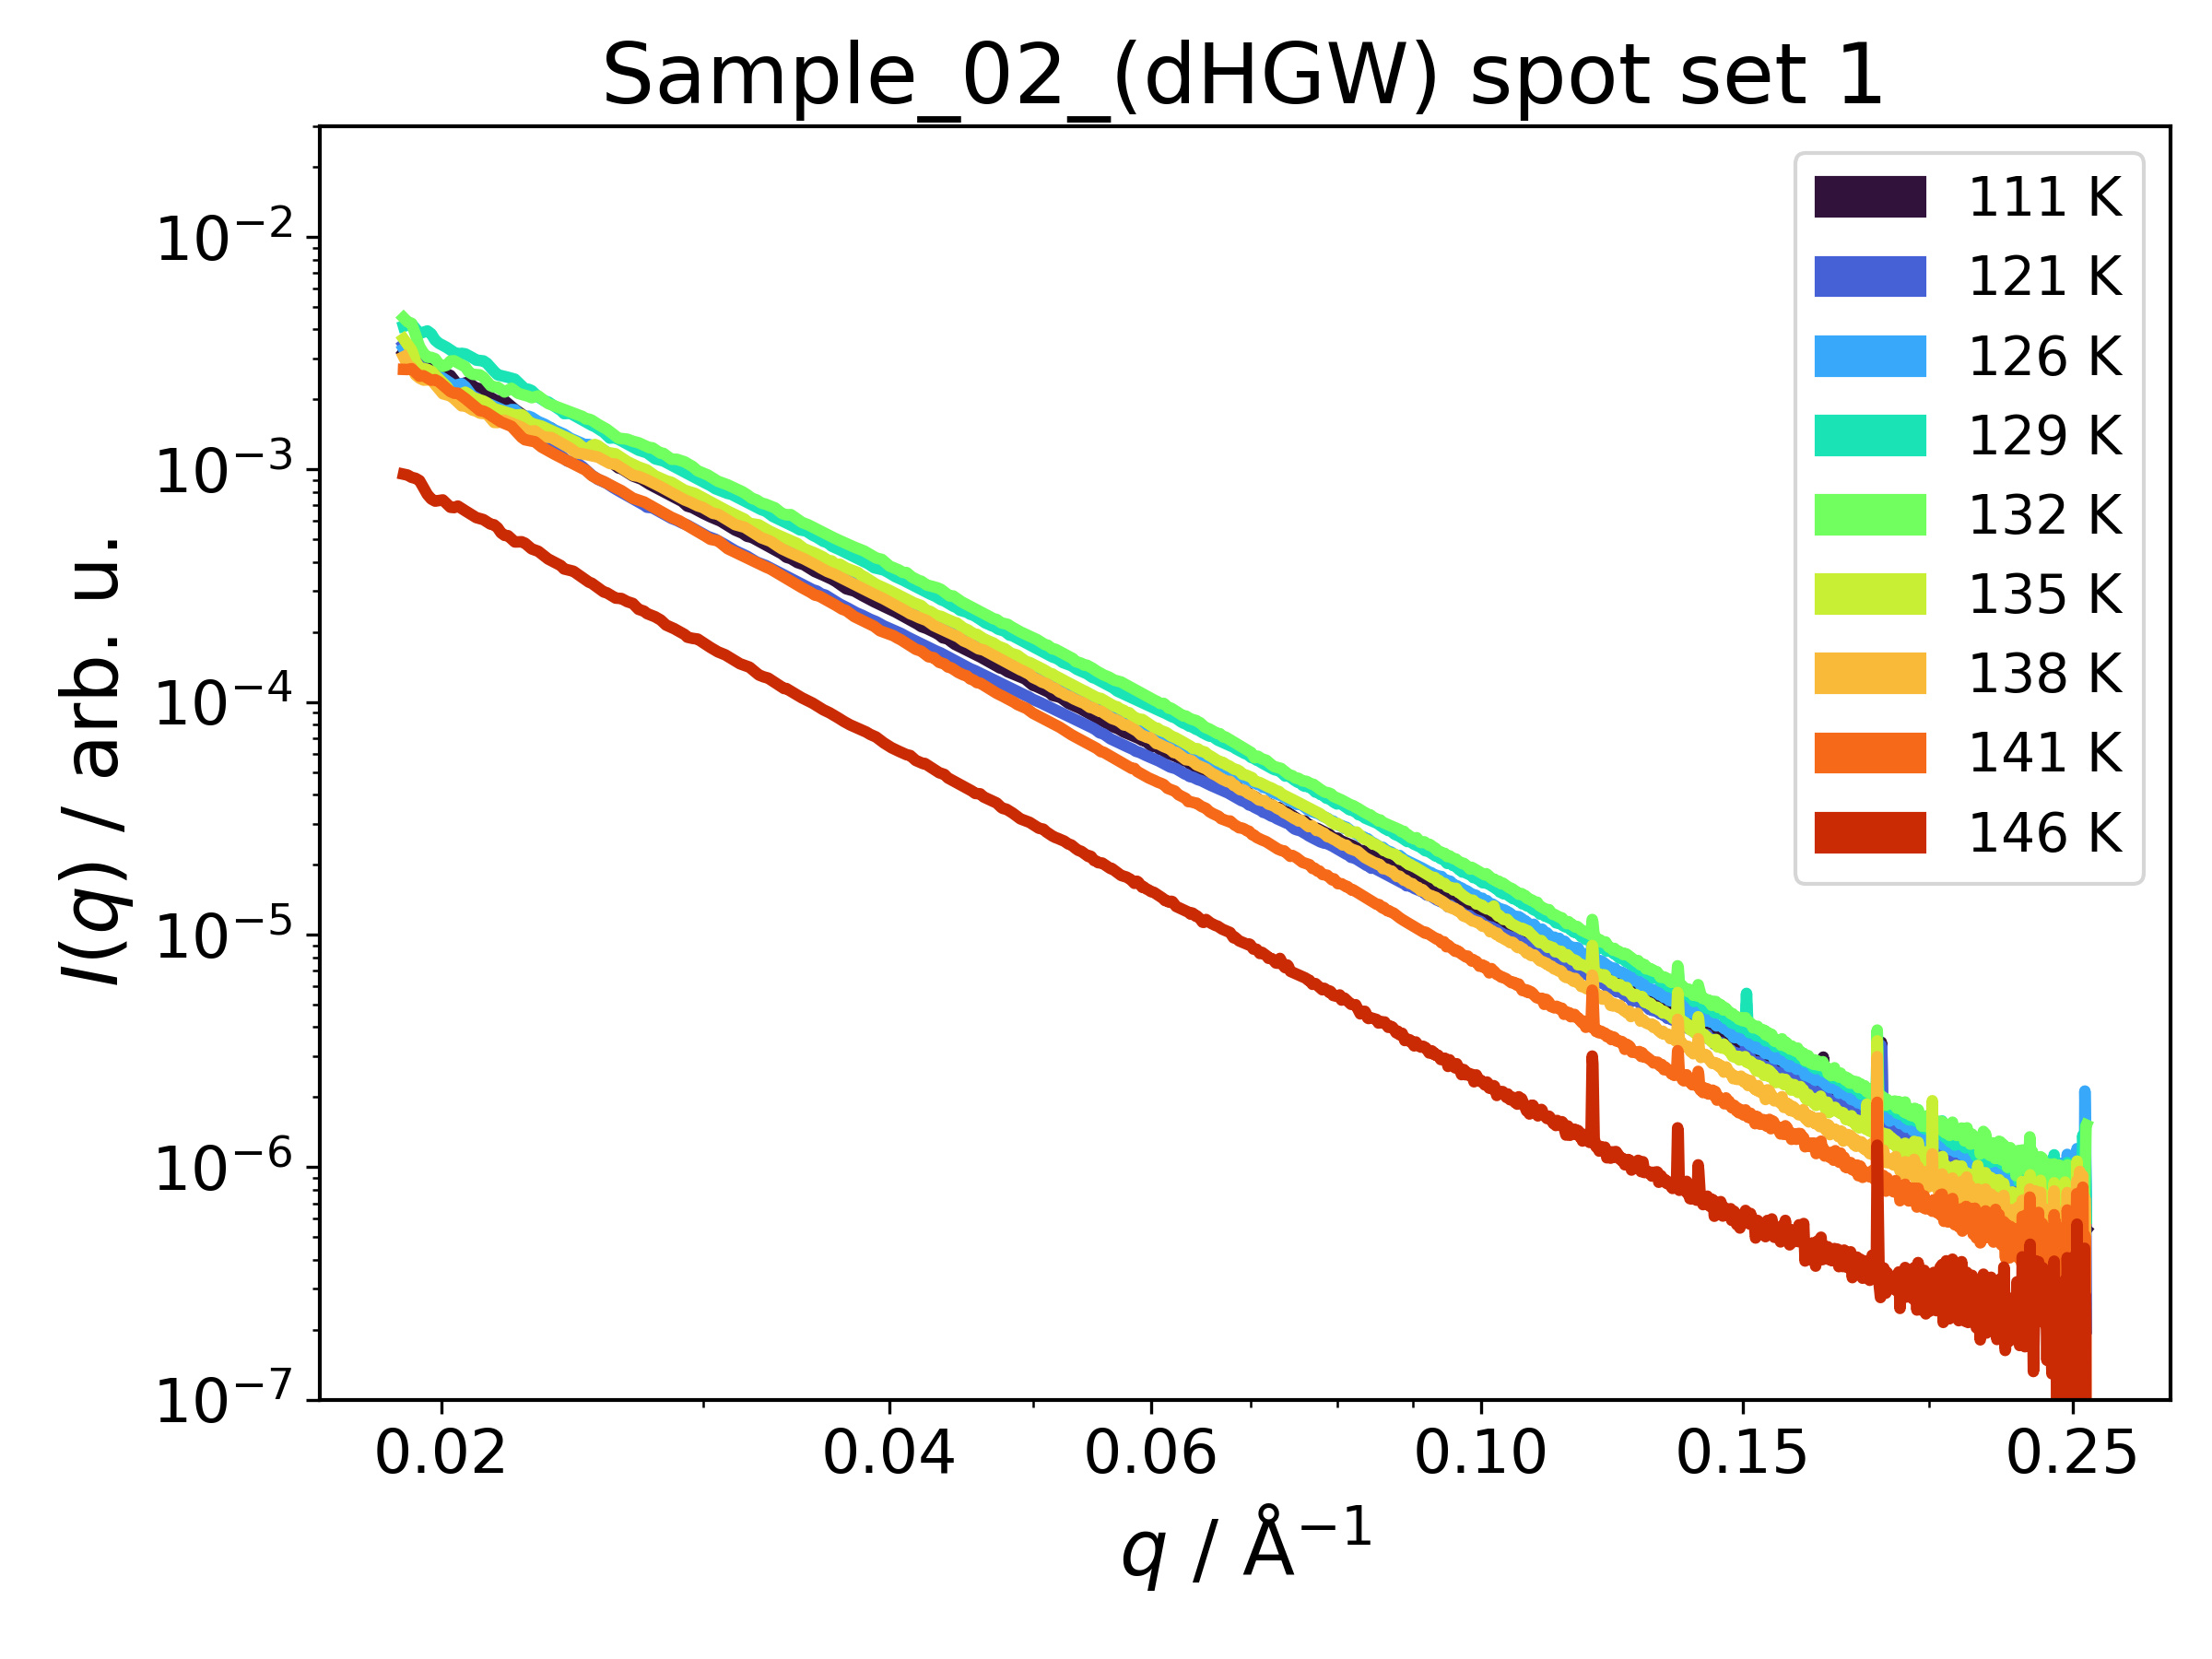

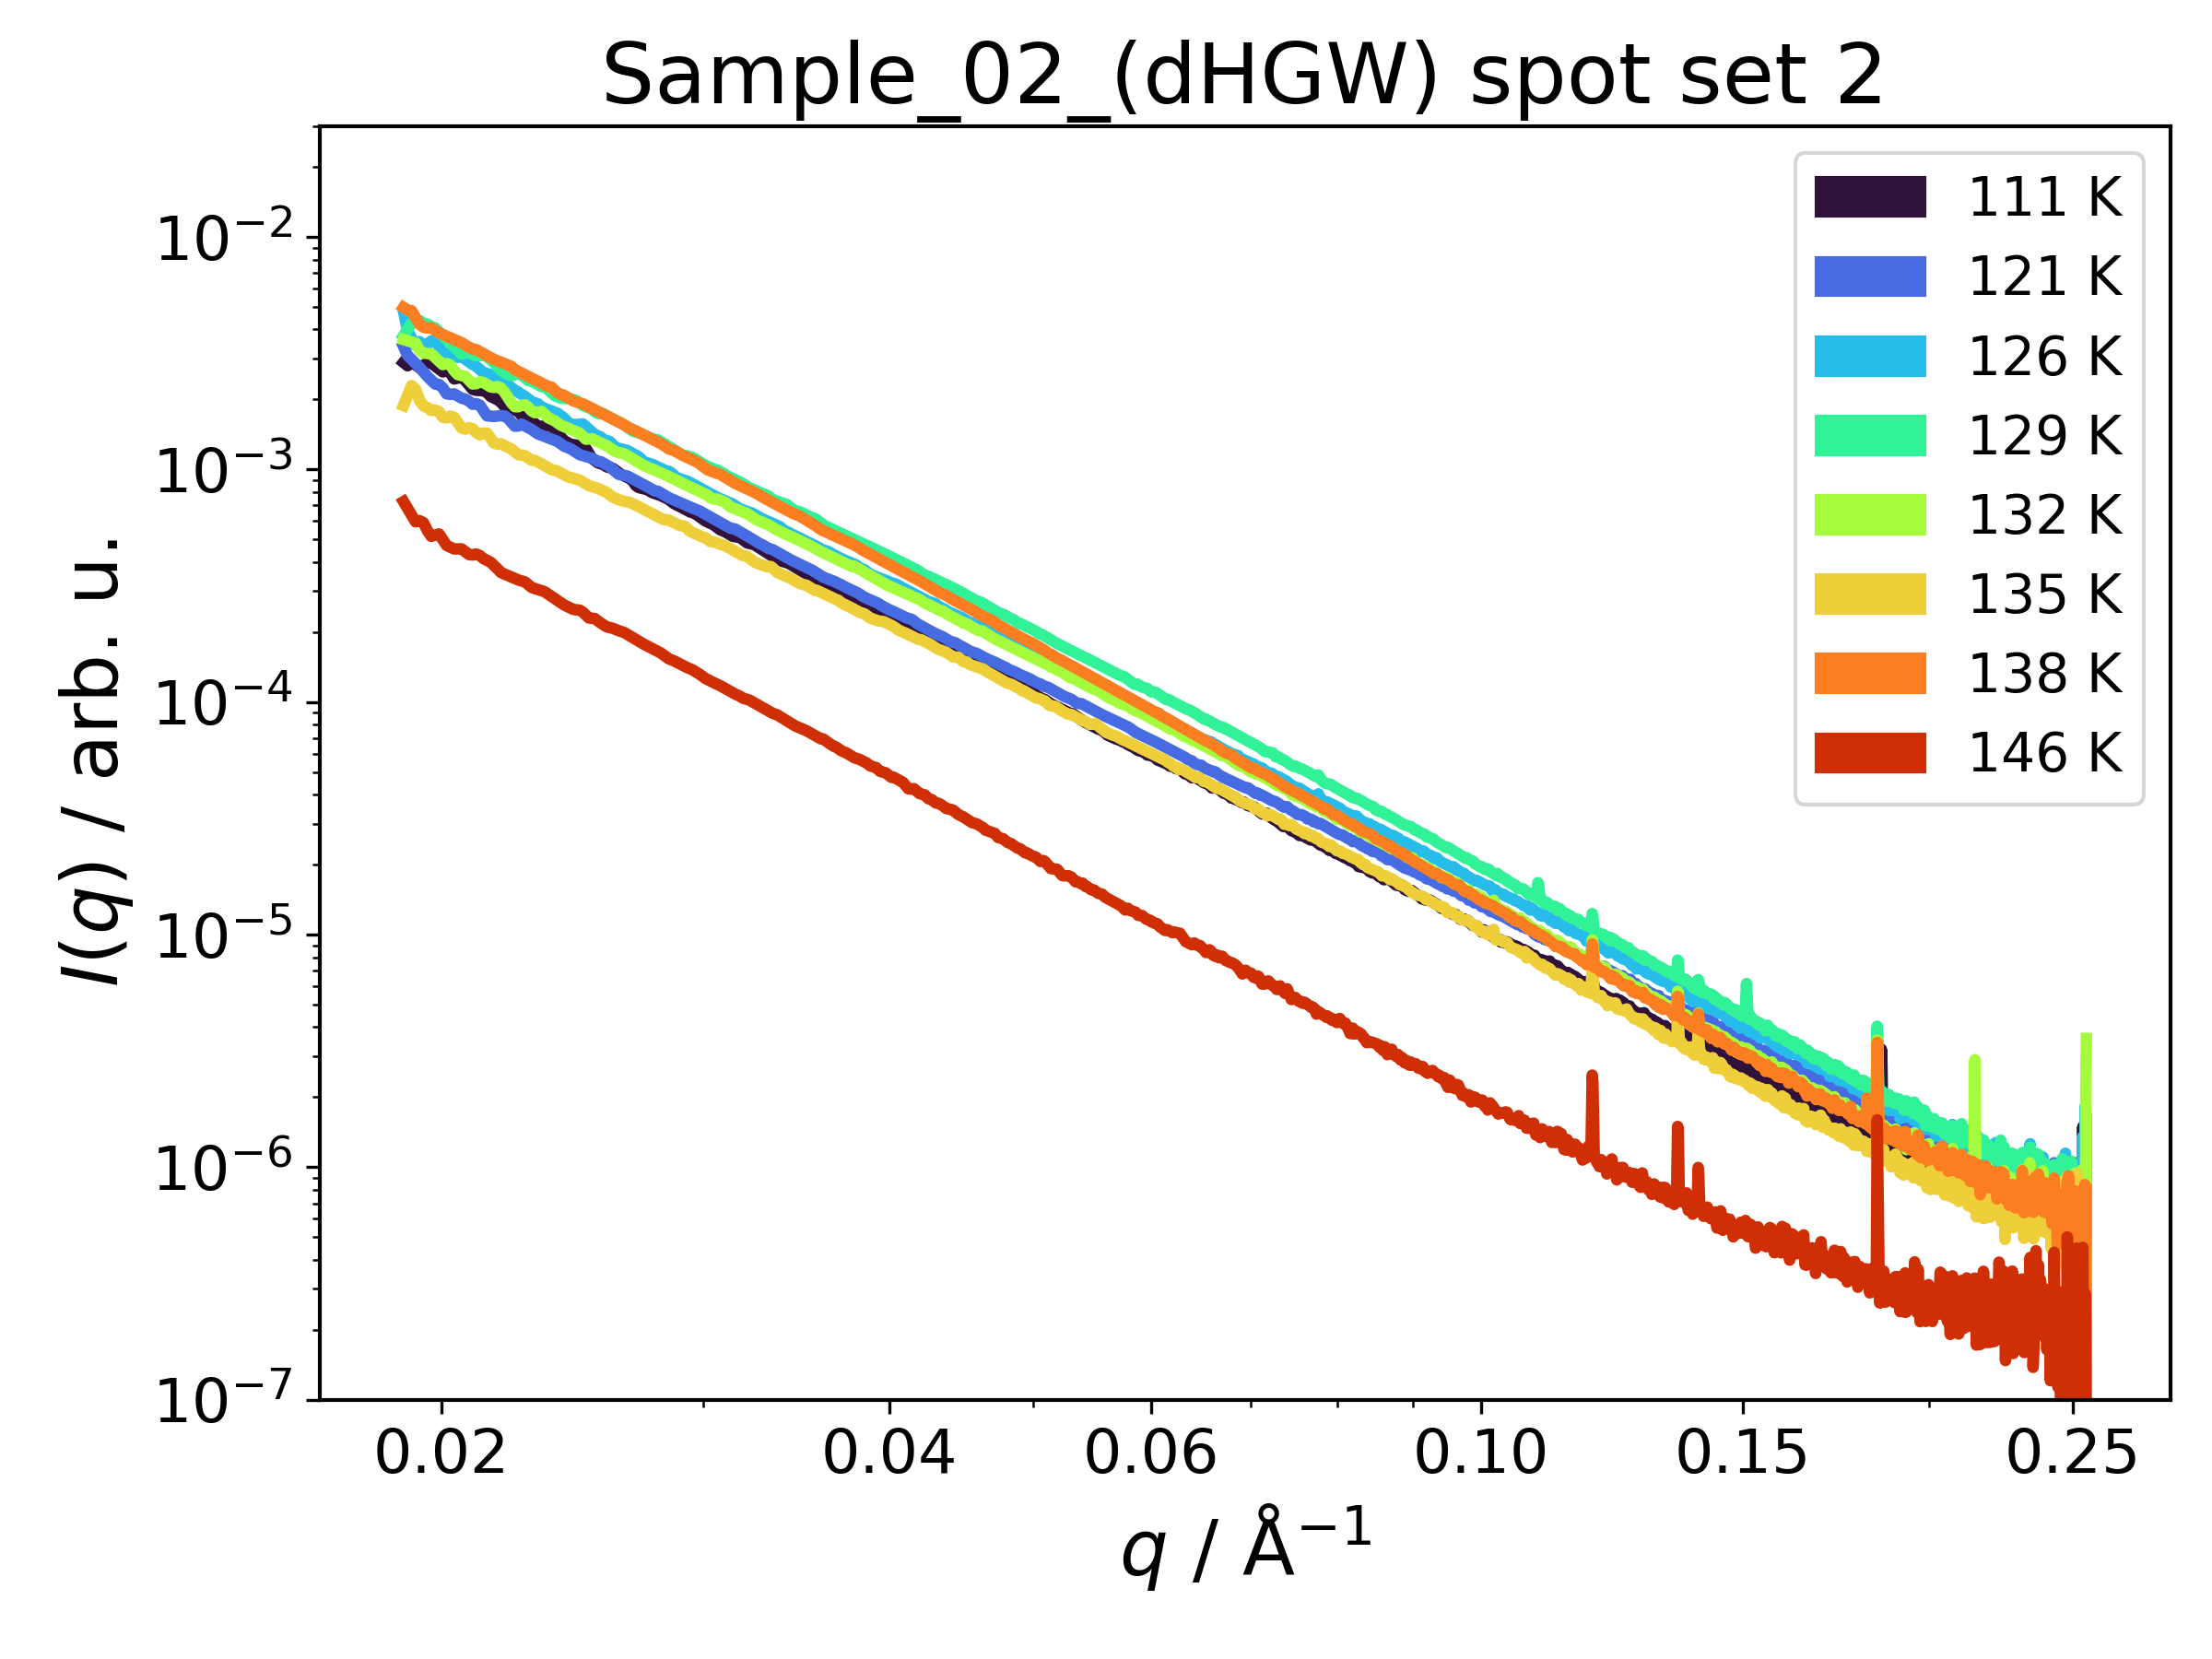

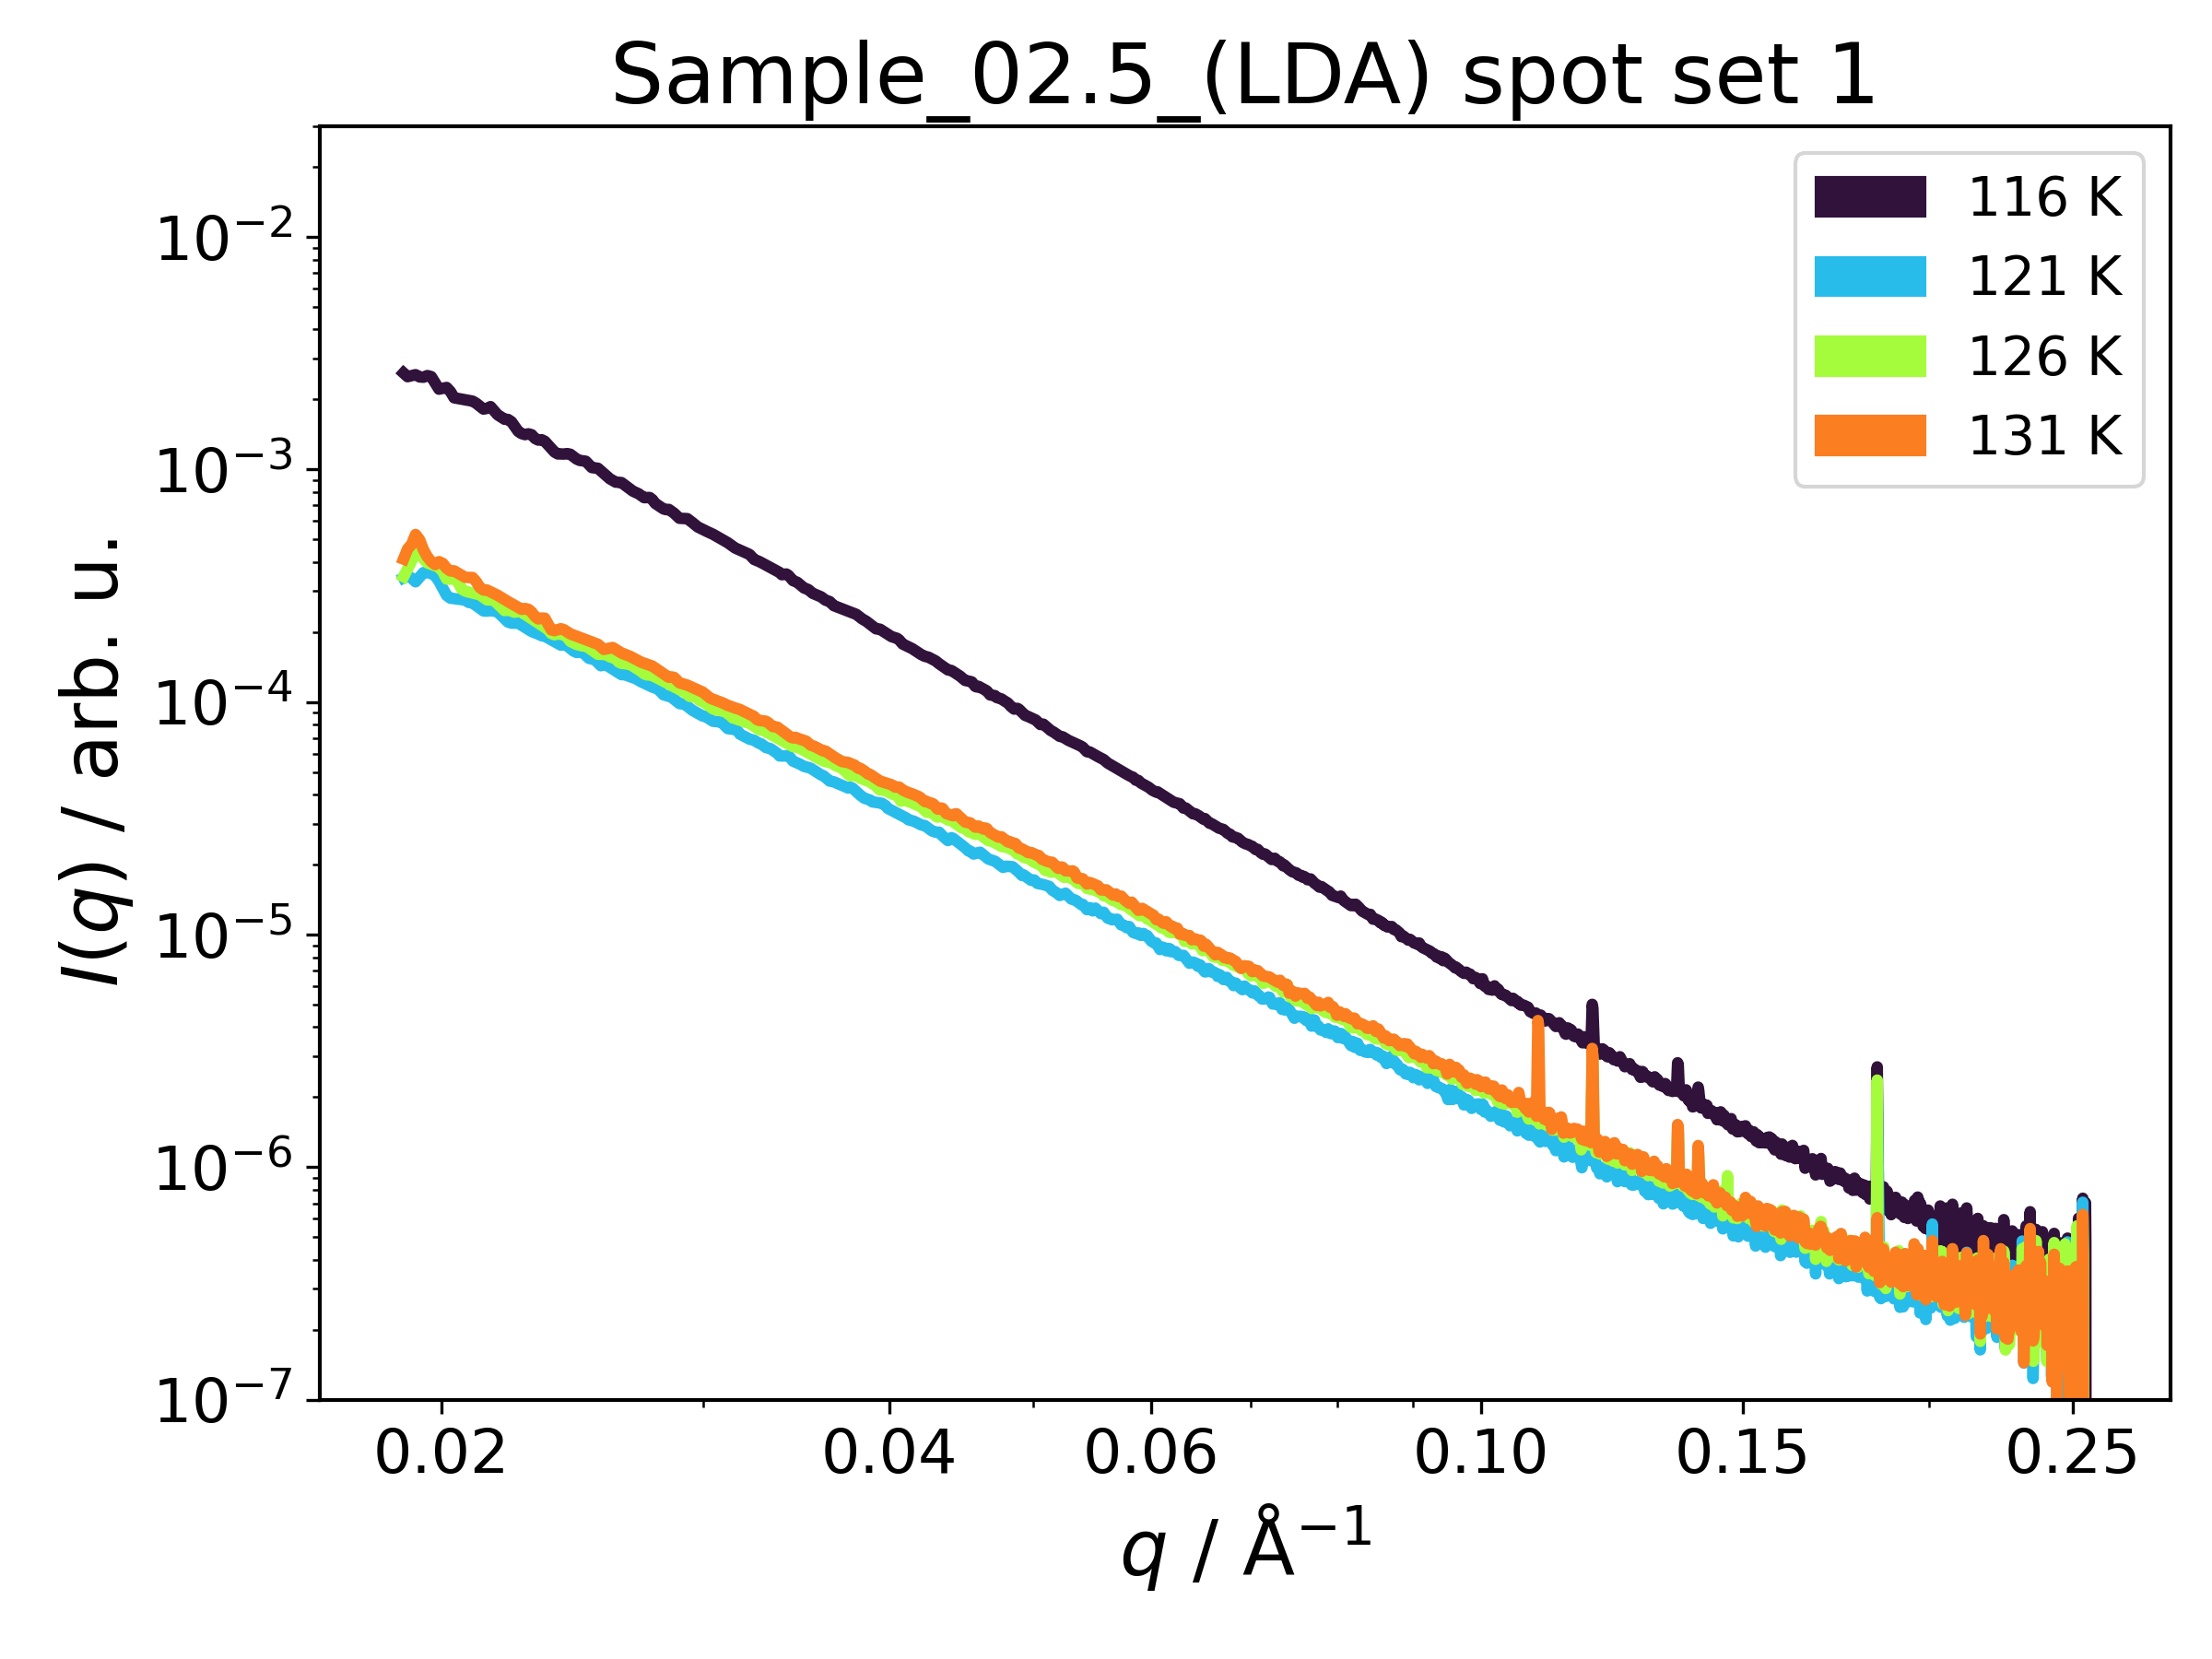


10 Hz static

10 Hz static

10 Hz static

**Figure S9:** Raw azimuthally integrated SAXS data for dHGW (HDA, sample 02) and LDA (sample 02.5) made *in situ* from dHGW. The data were normalized to the intensity of the incident beam measured by an X-ray gas monitor (XGM) upstream of the sample.


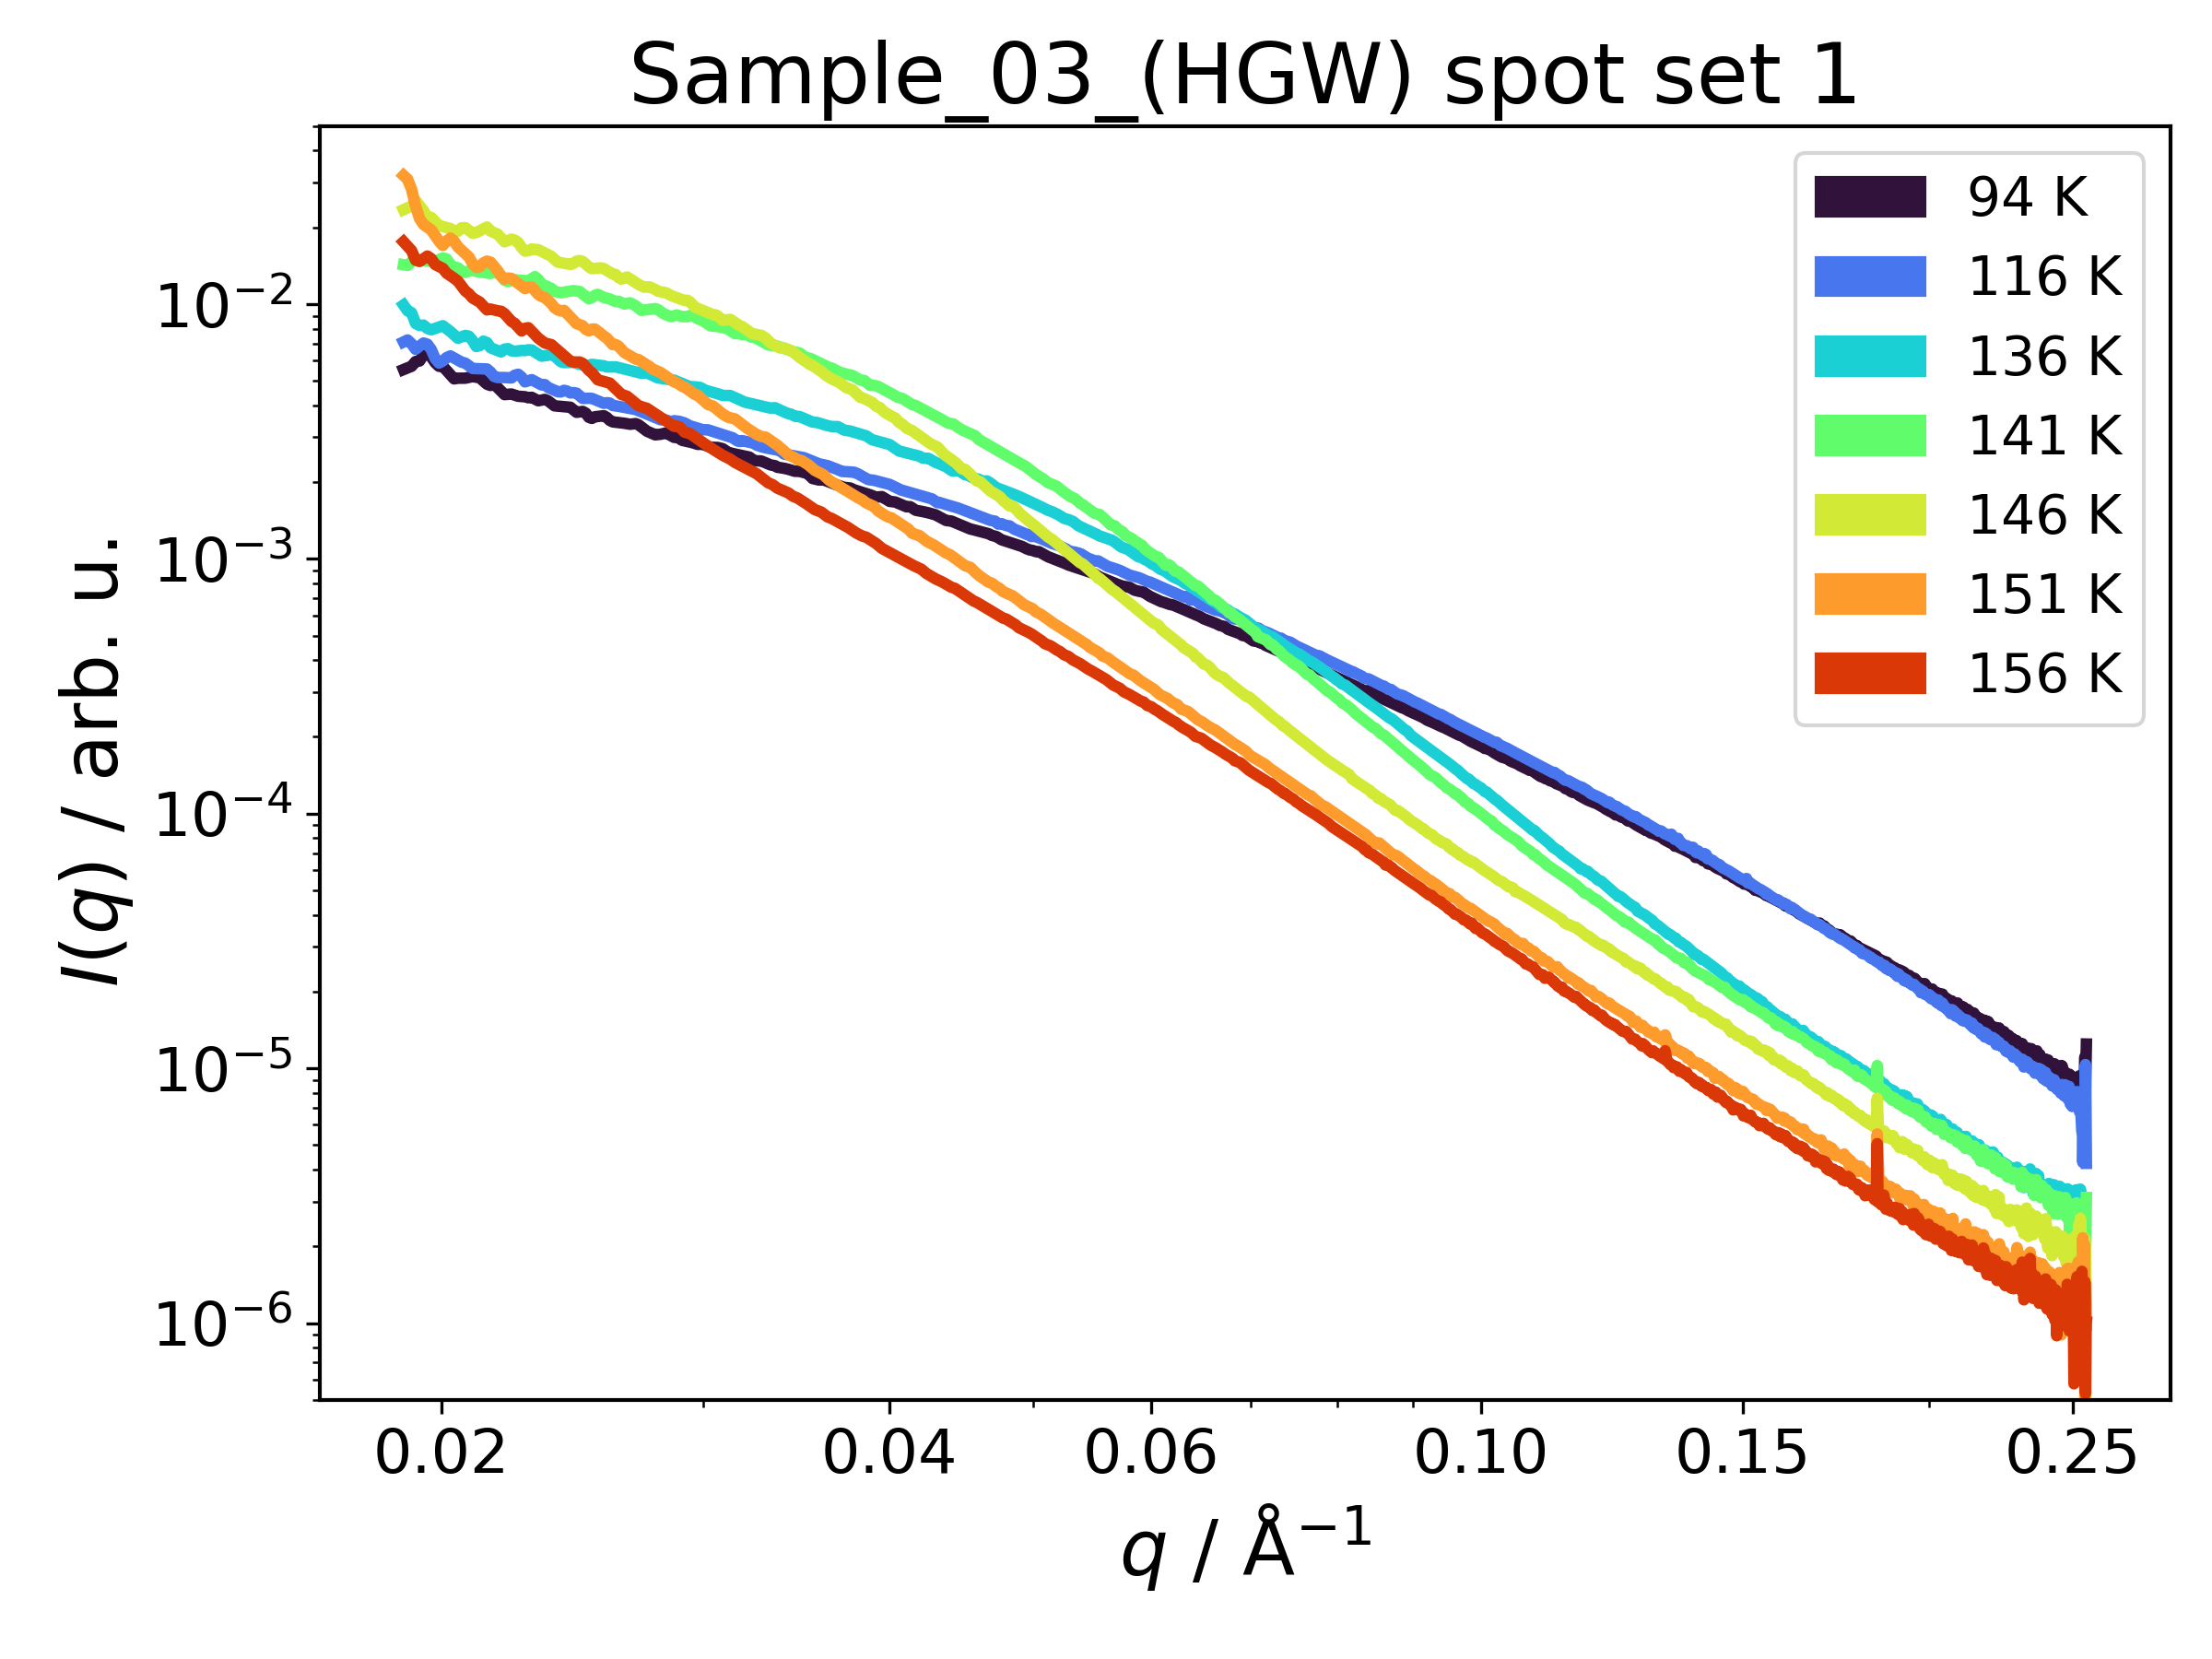

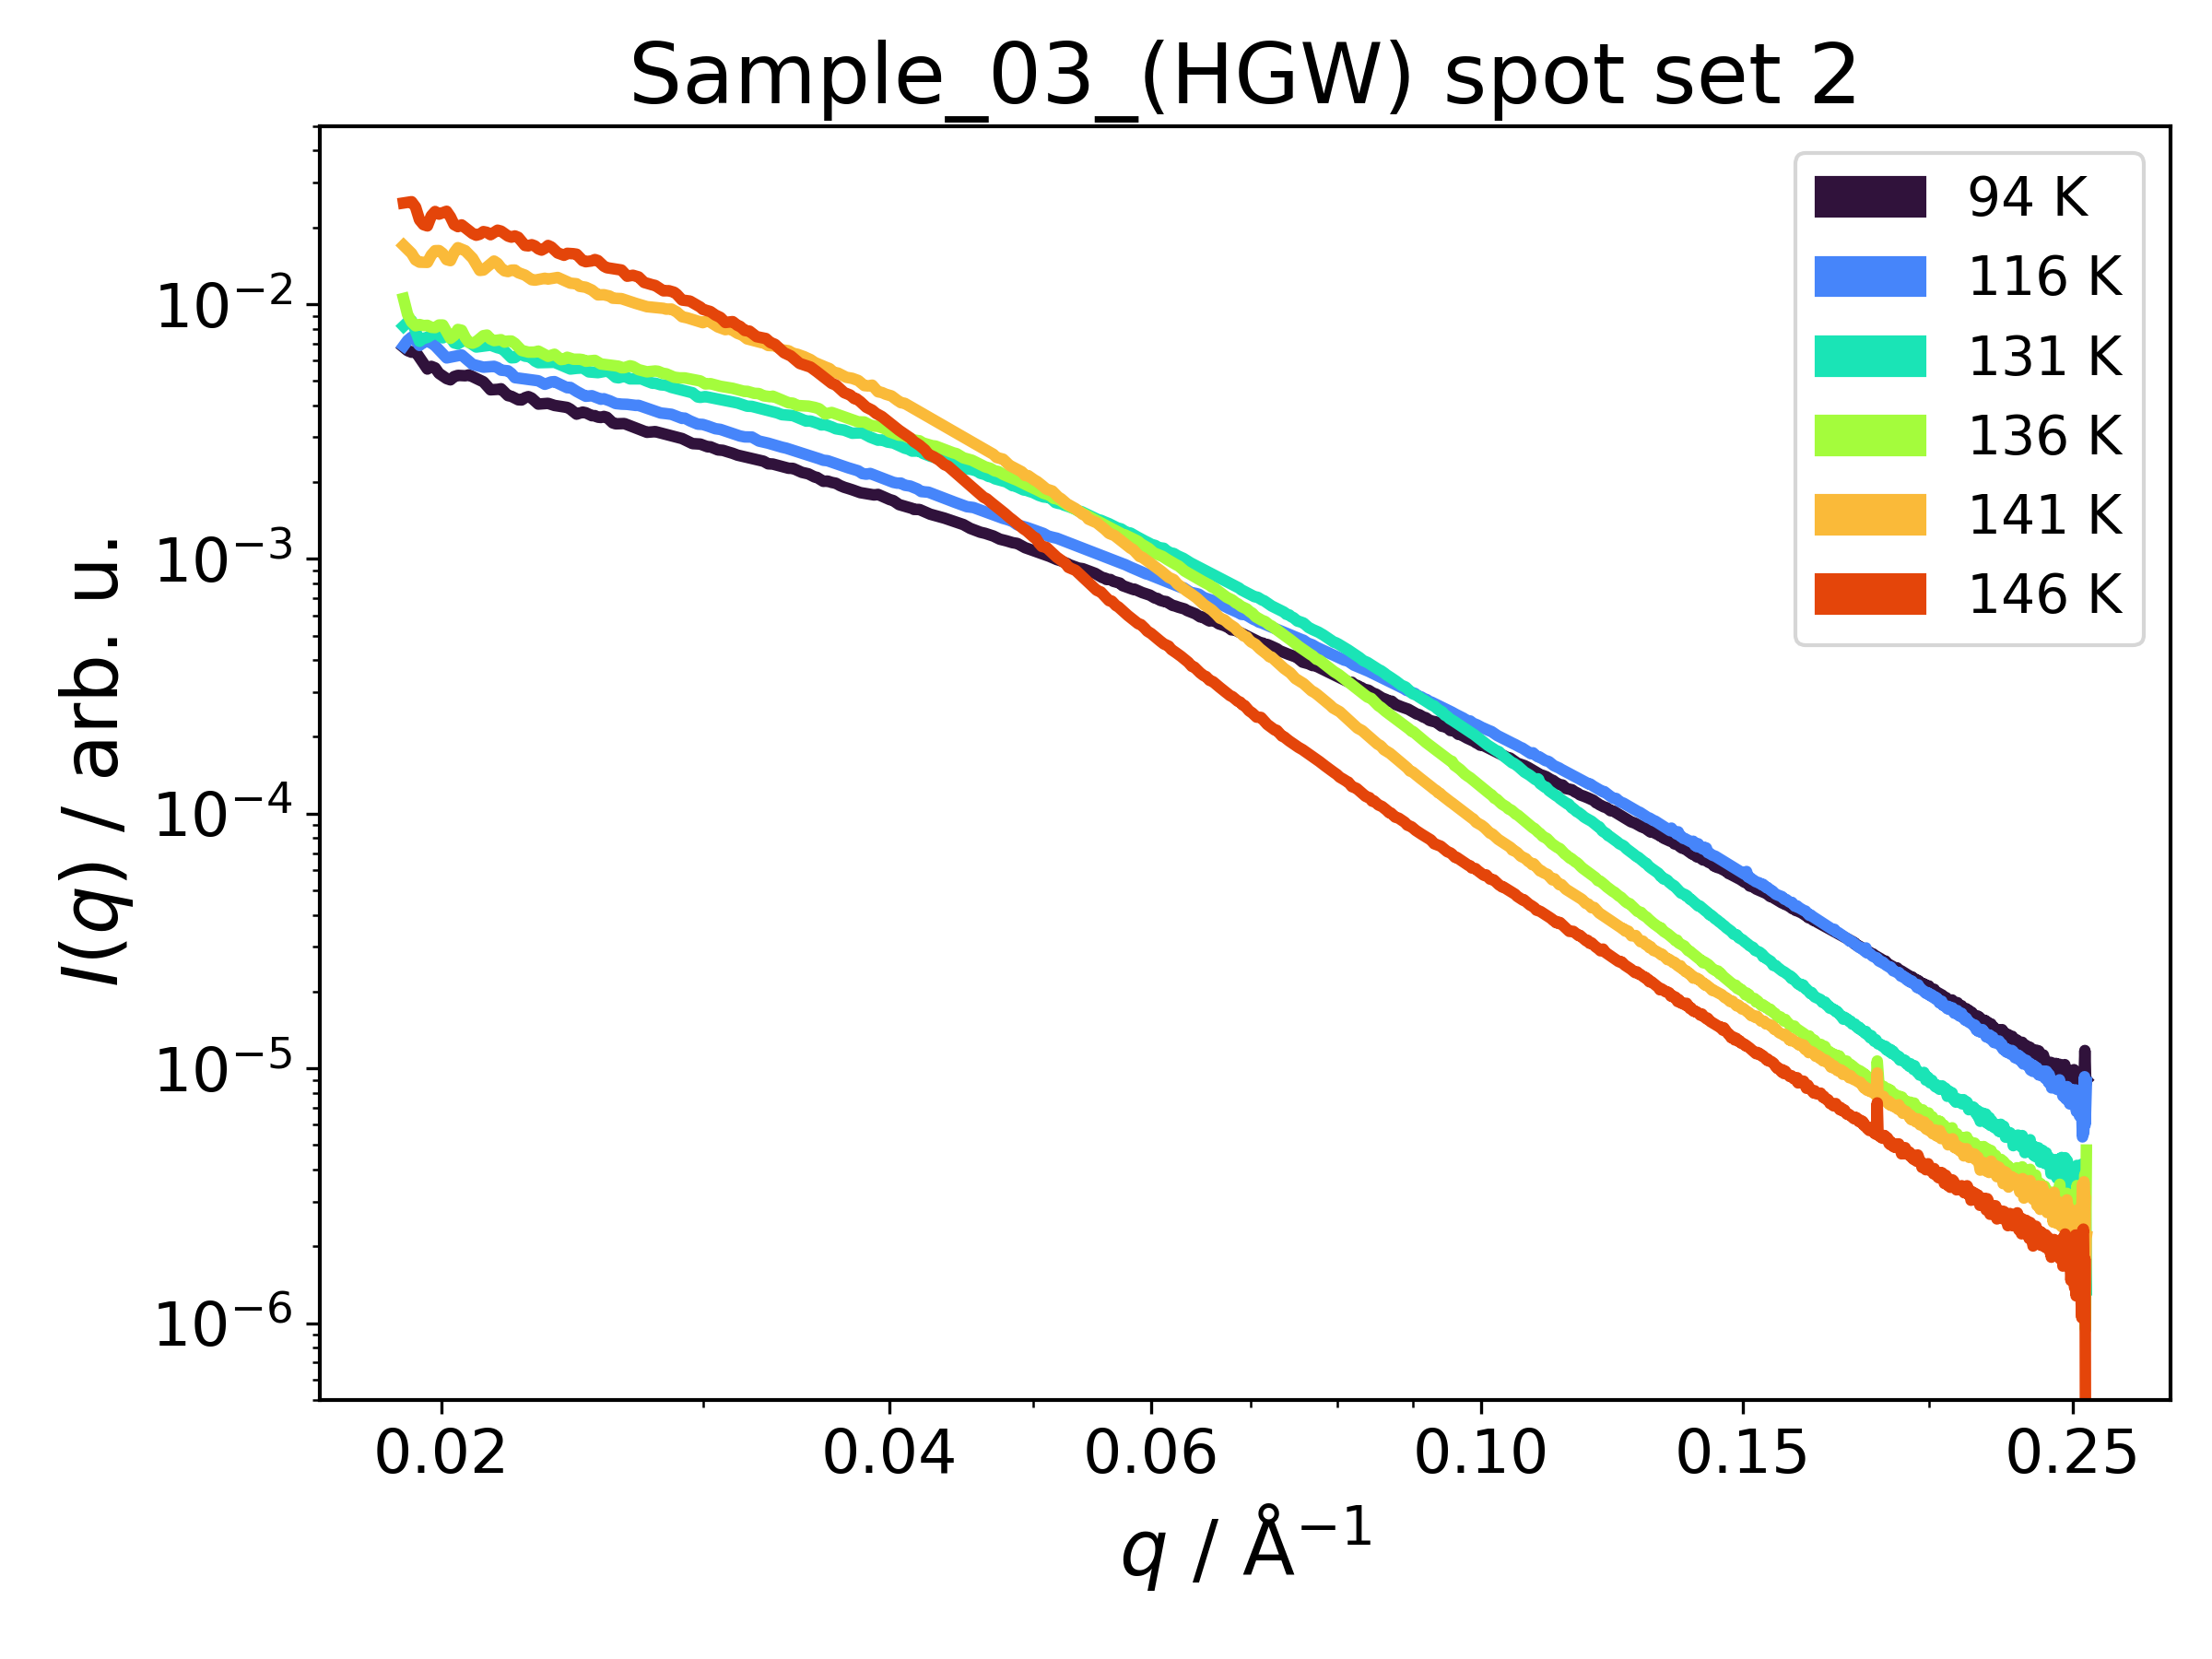

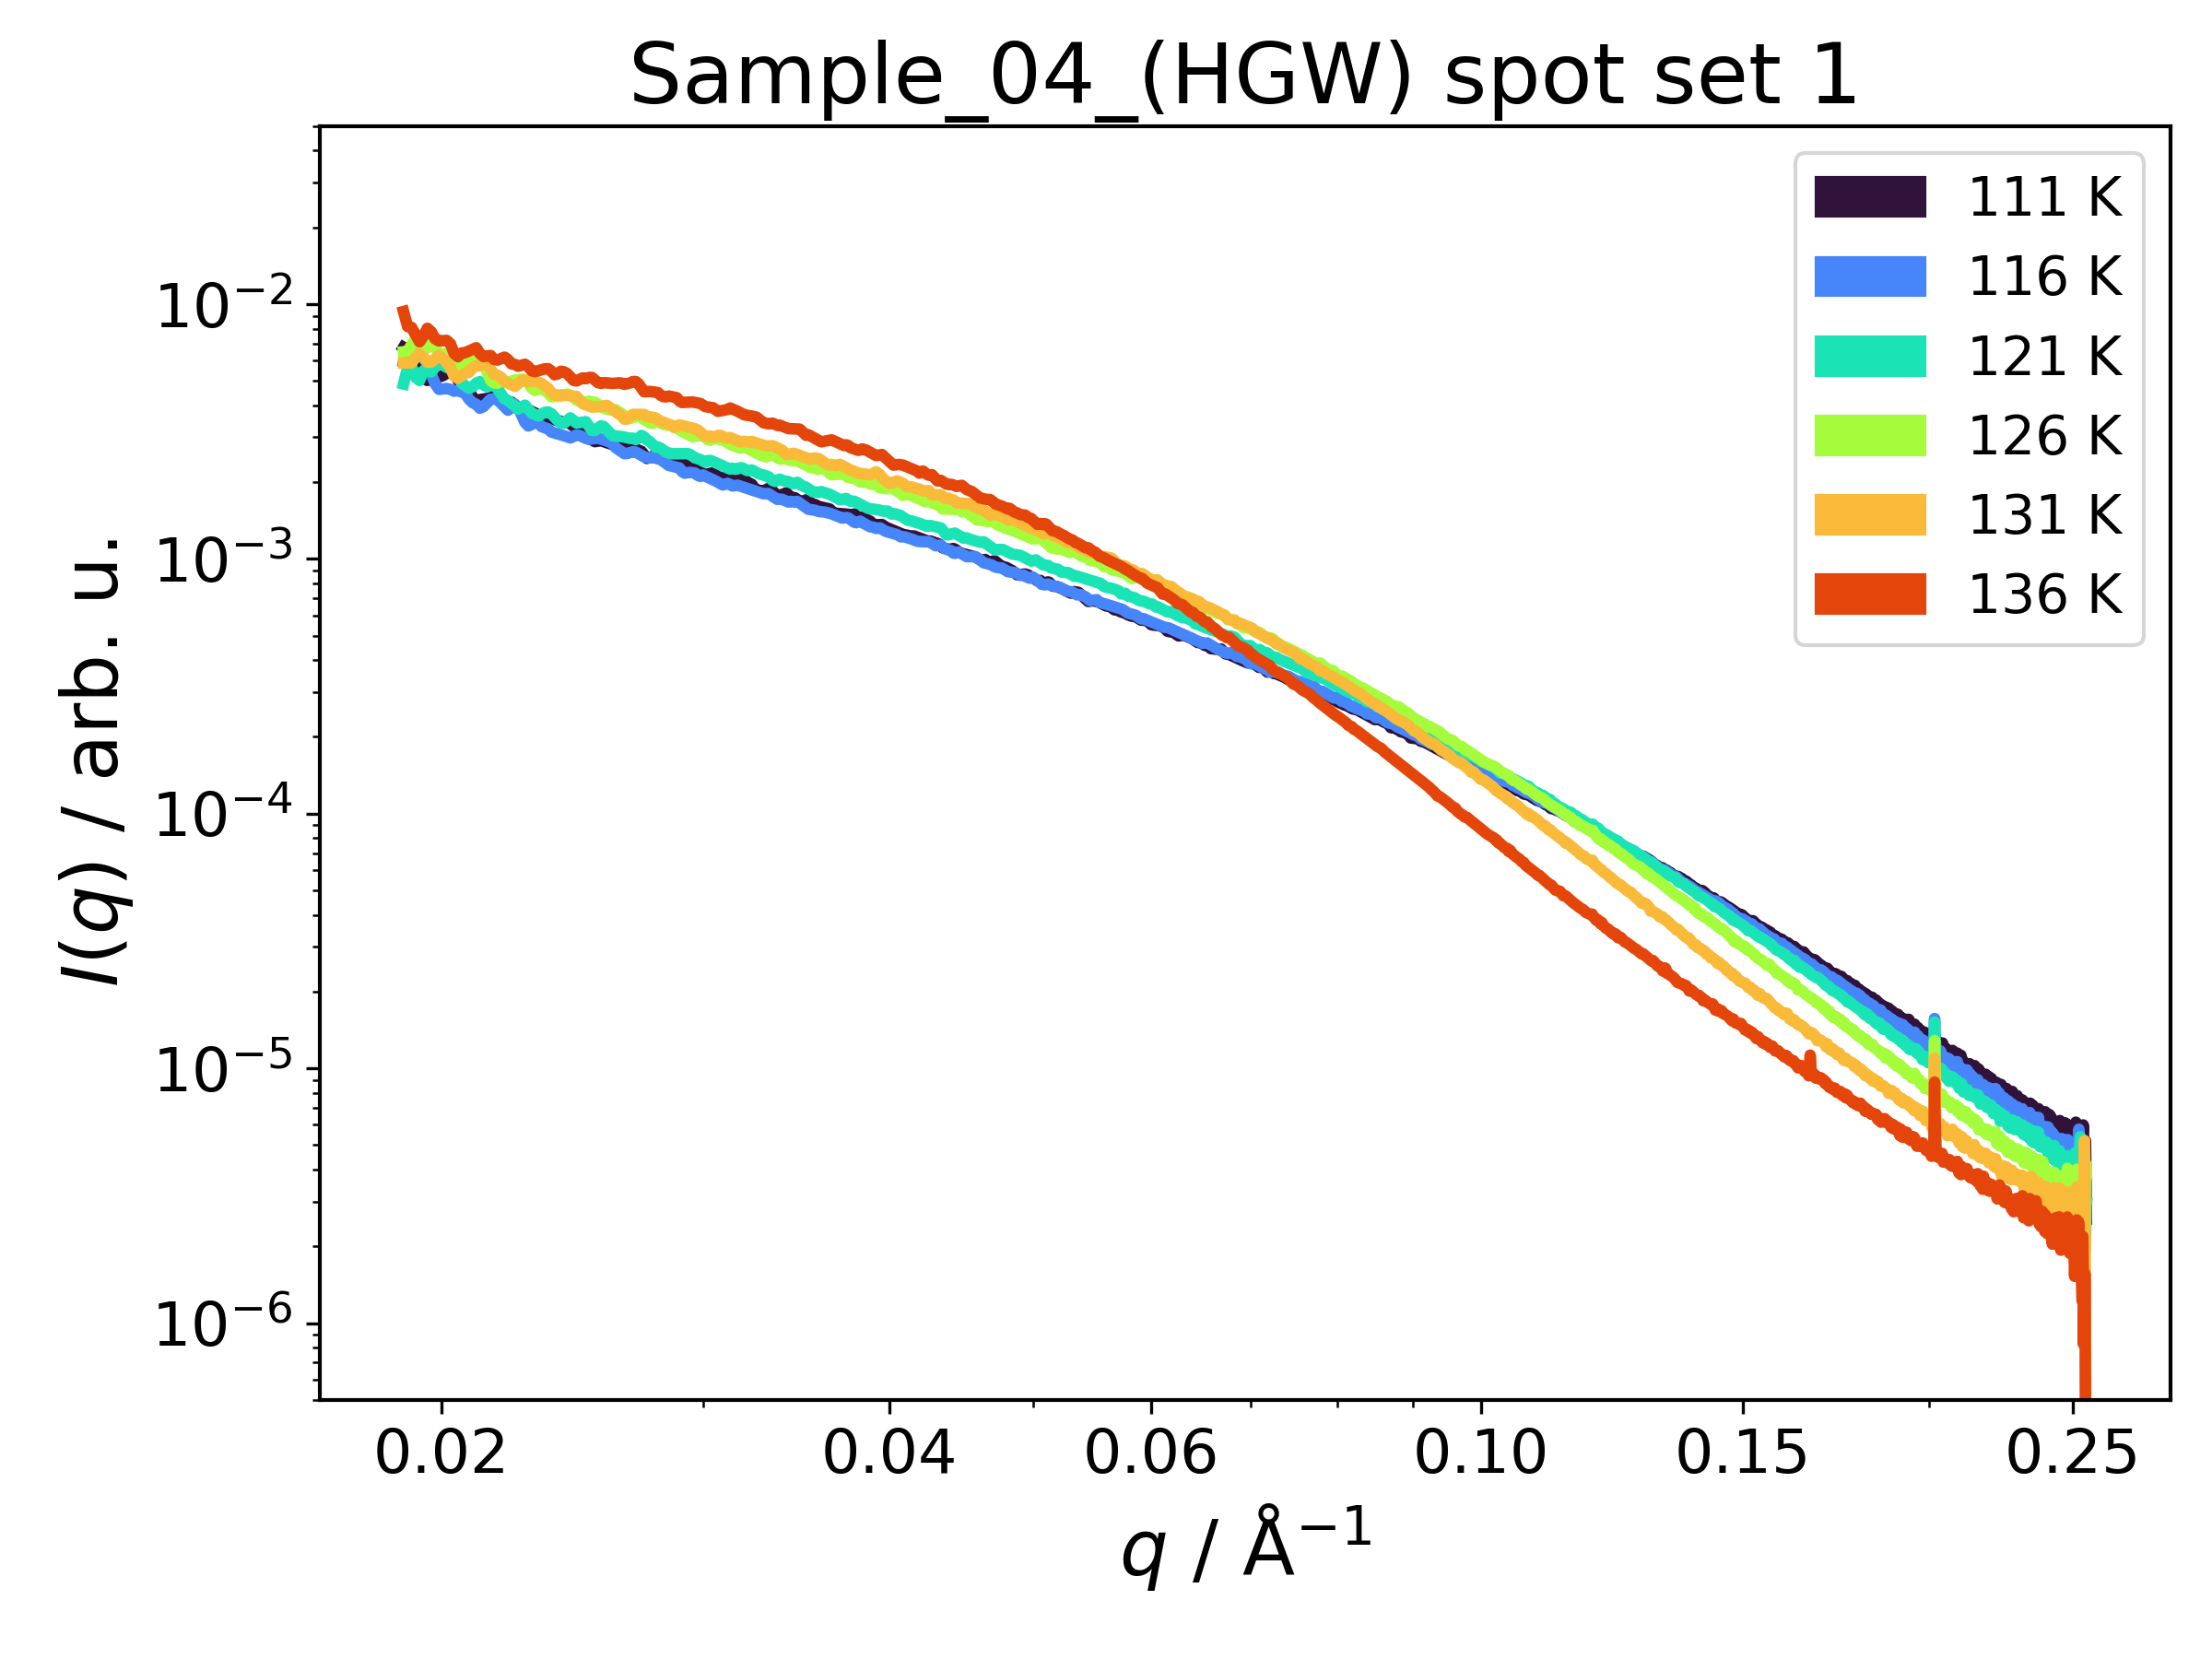

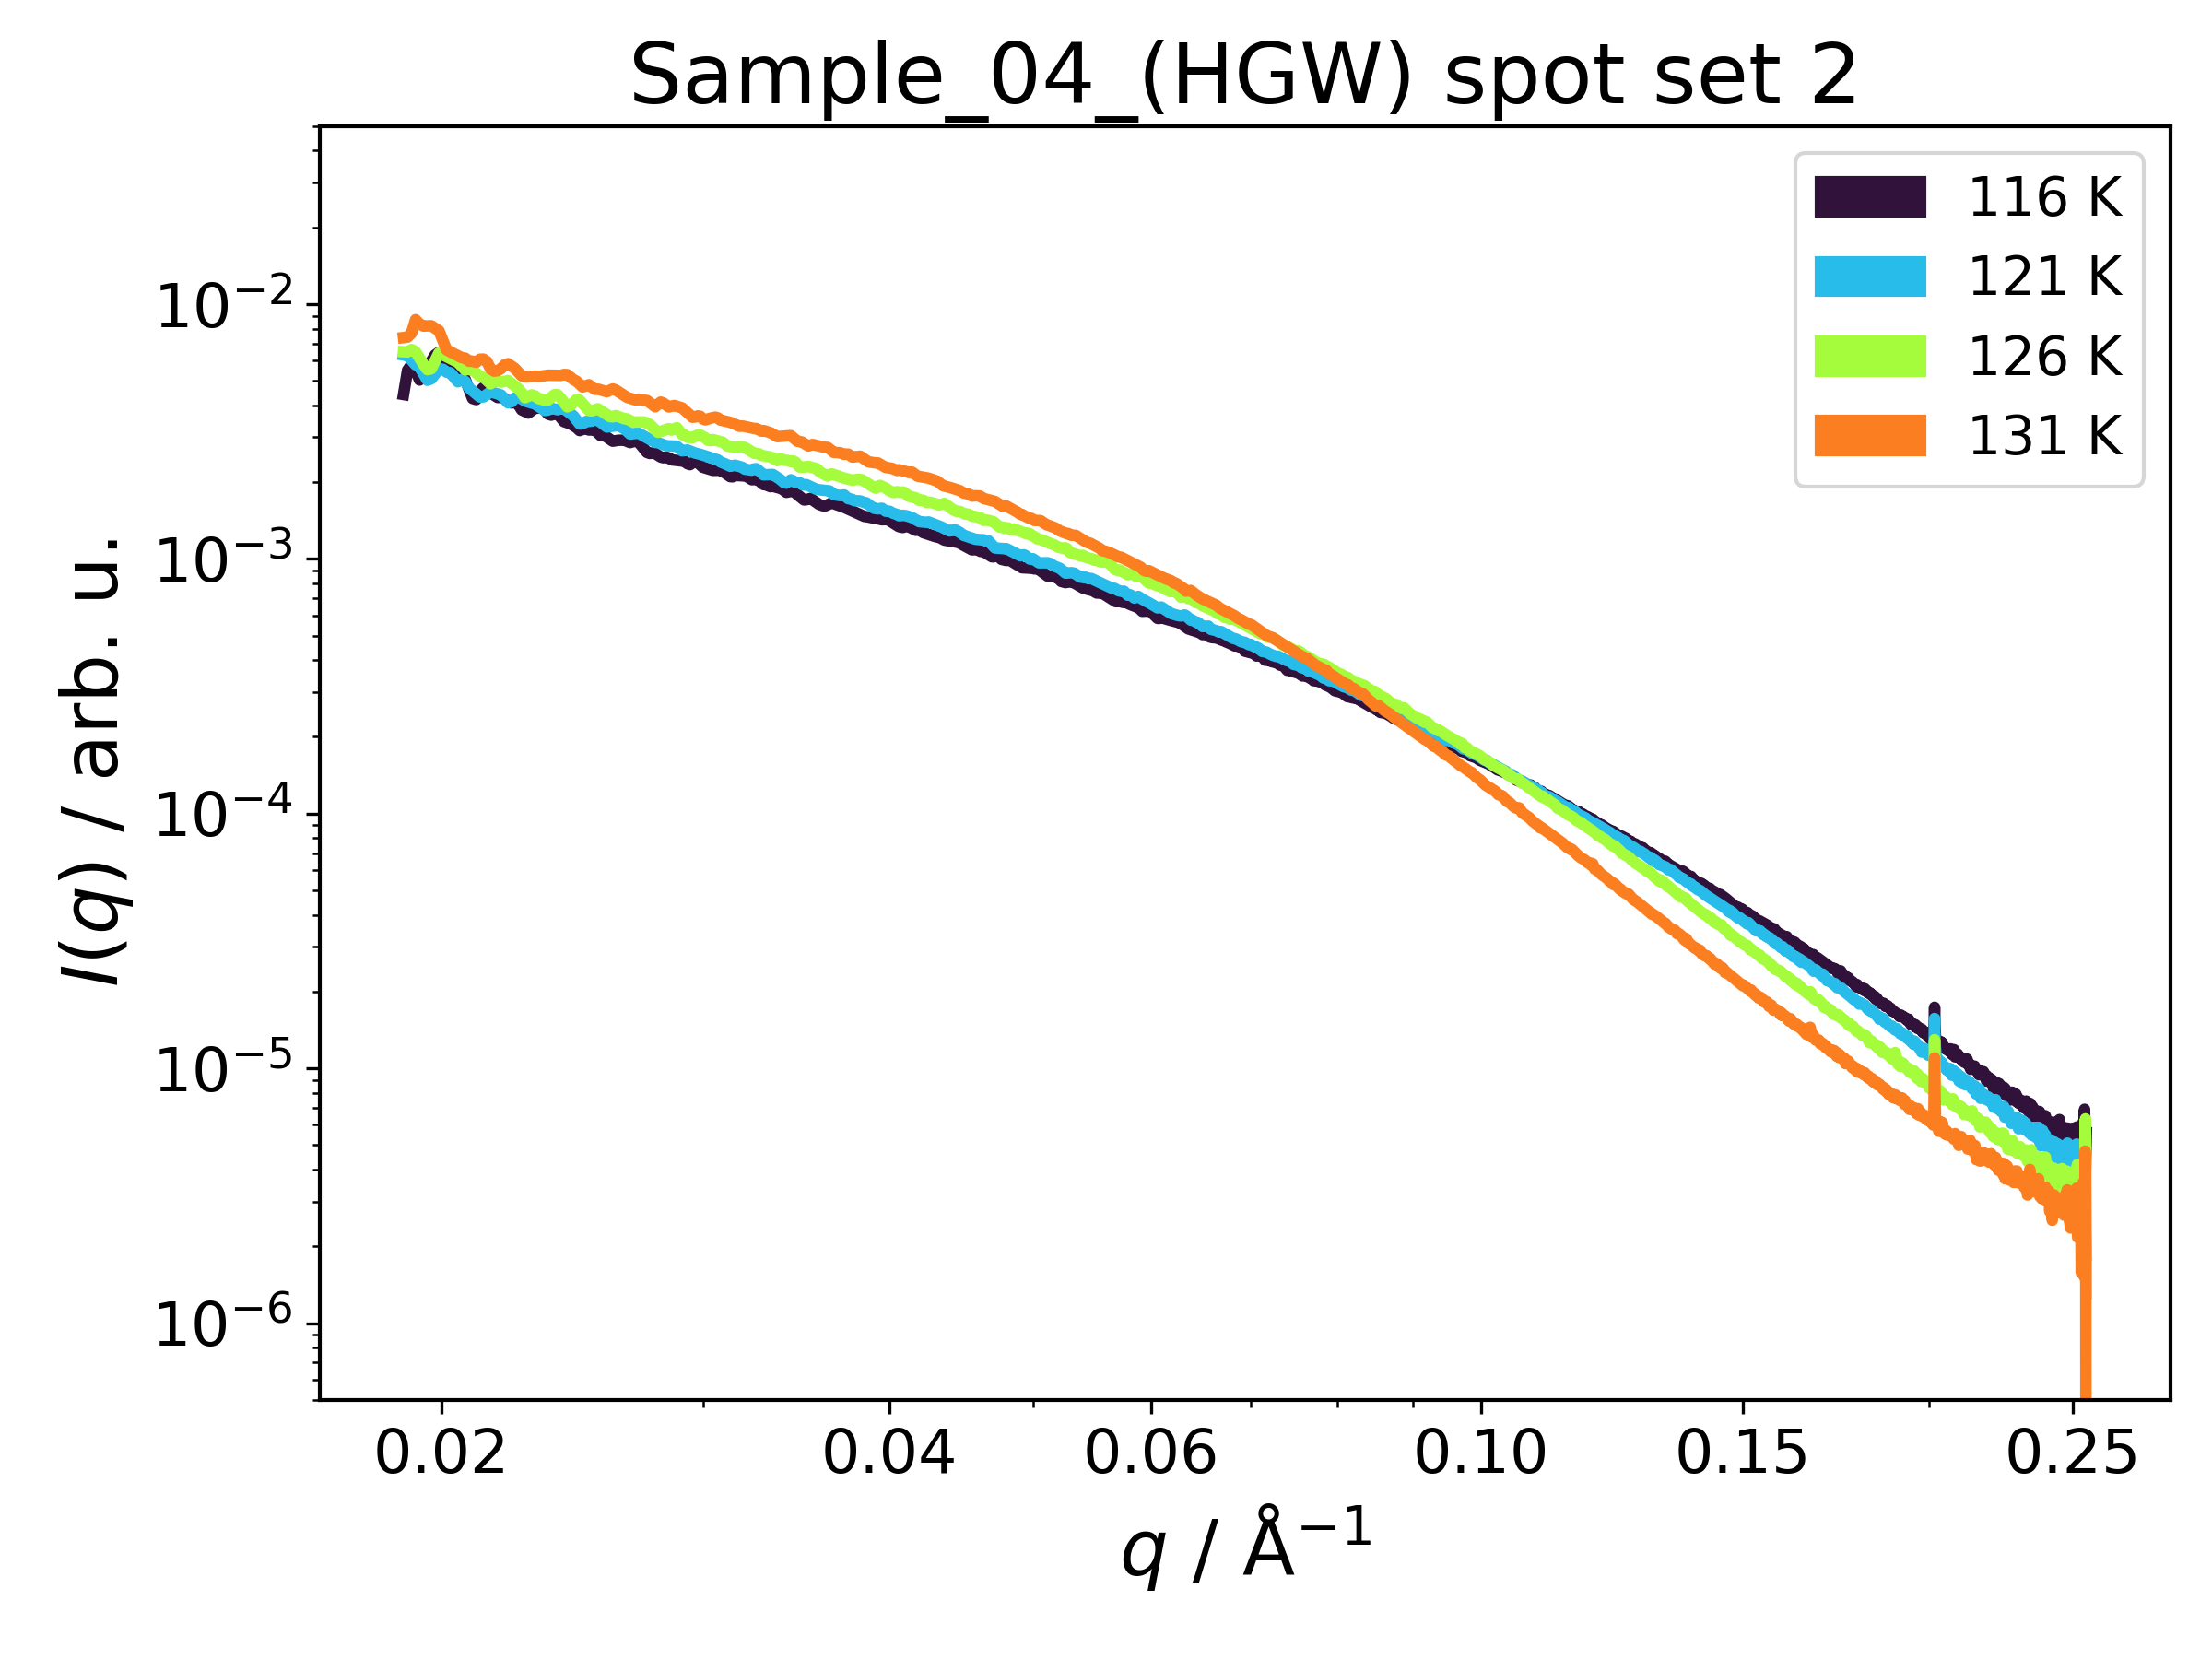


10 Hz static

10 Hz static

10 Hz static

10 Hz static

**Figure S10:** Raw azimuthally integrated SAXS data for different HGW samples. The data were normalized to the intensity of the incident beam measured by an X-ray gas monitor (XGM) upstream of the sample. *Continued on next page.*


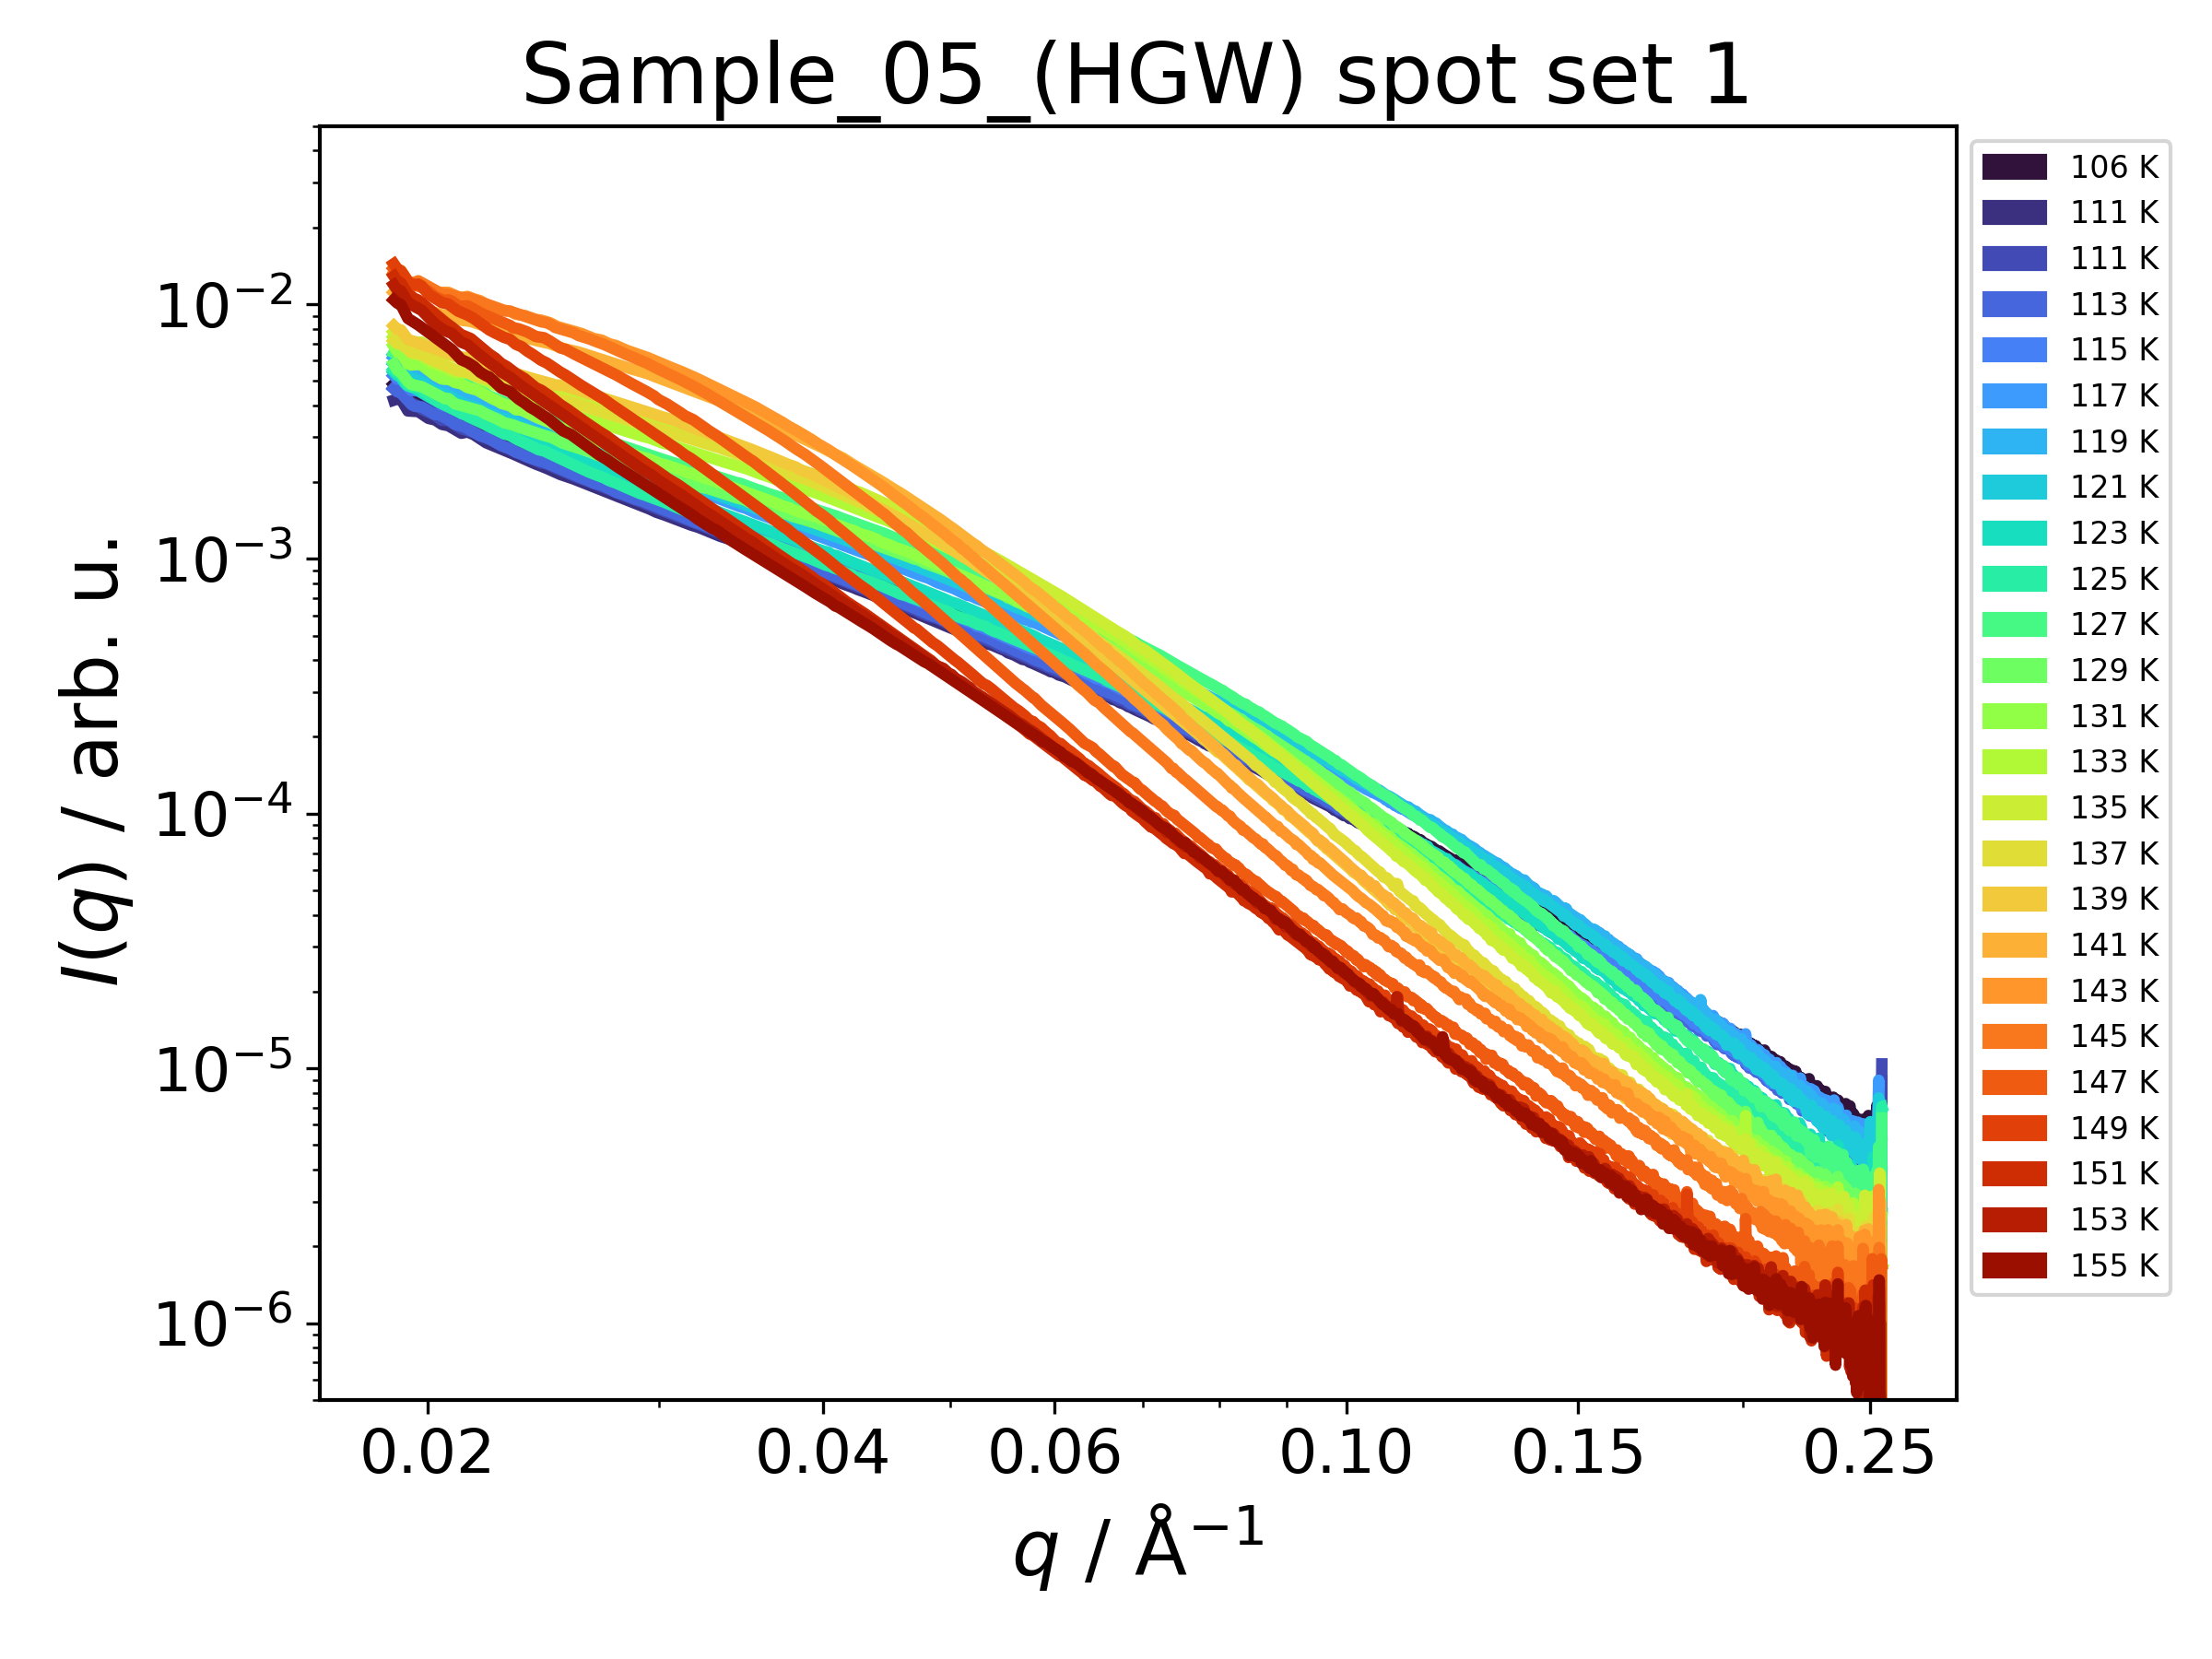

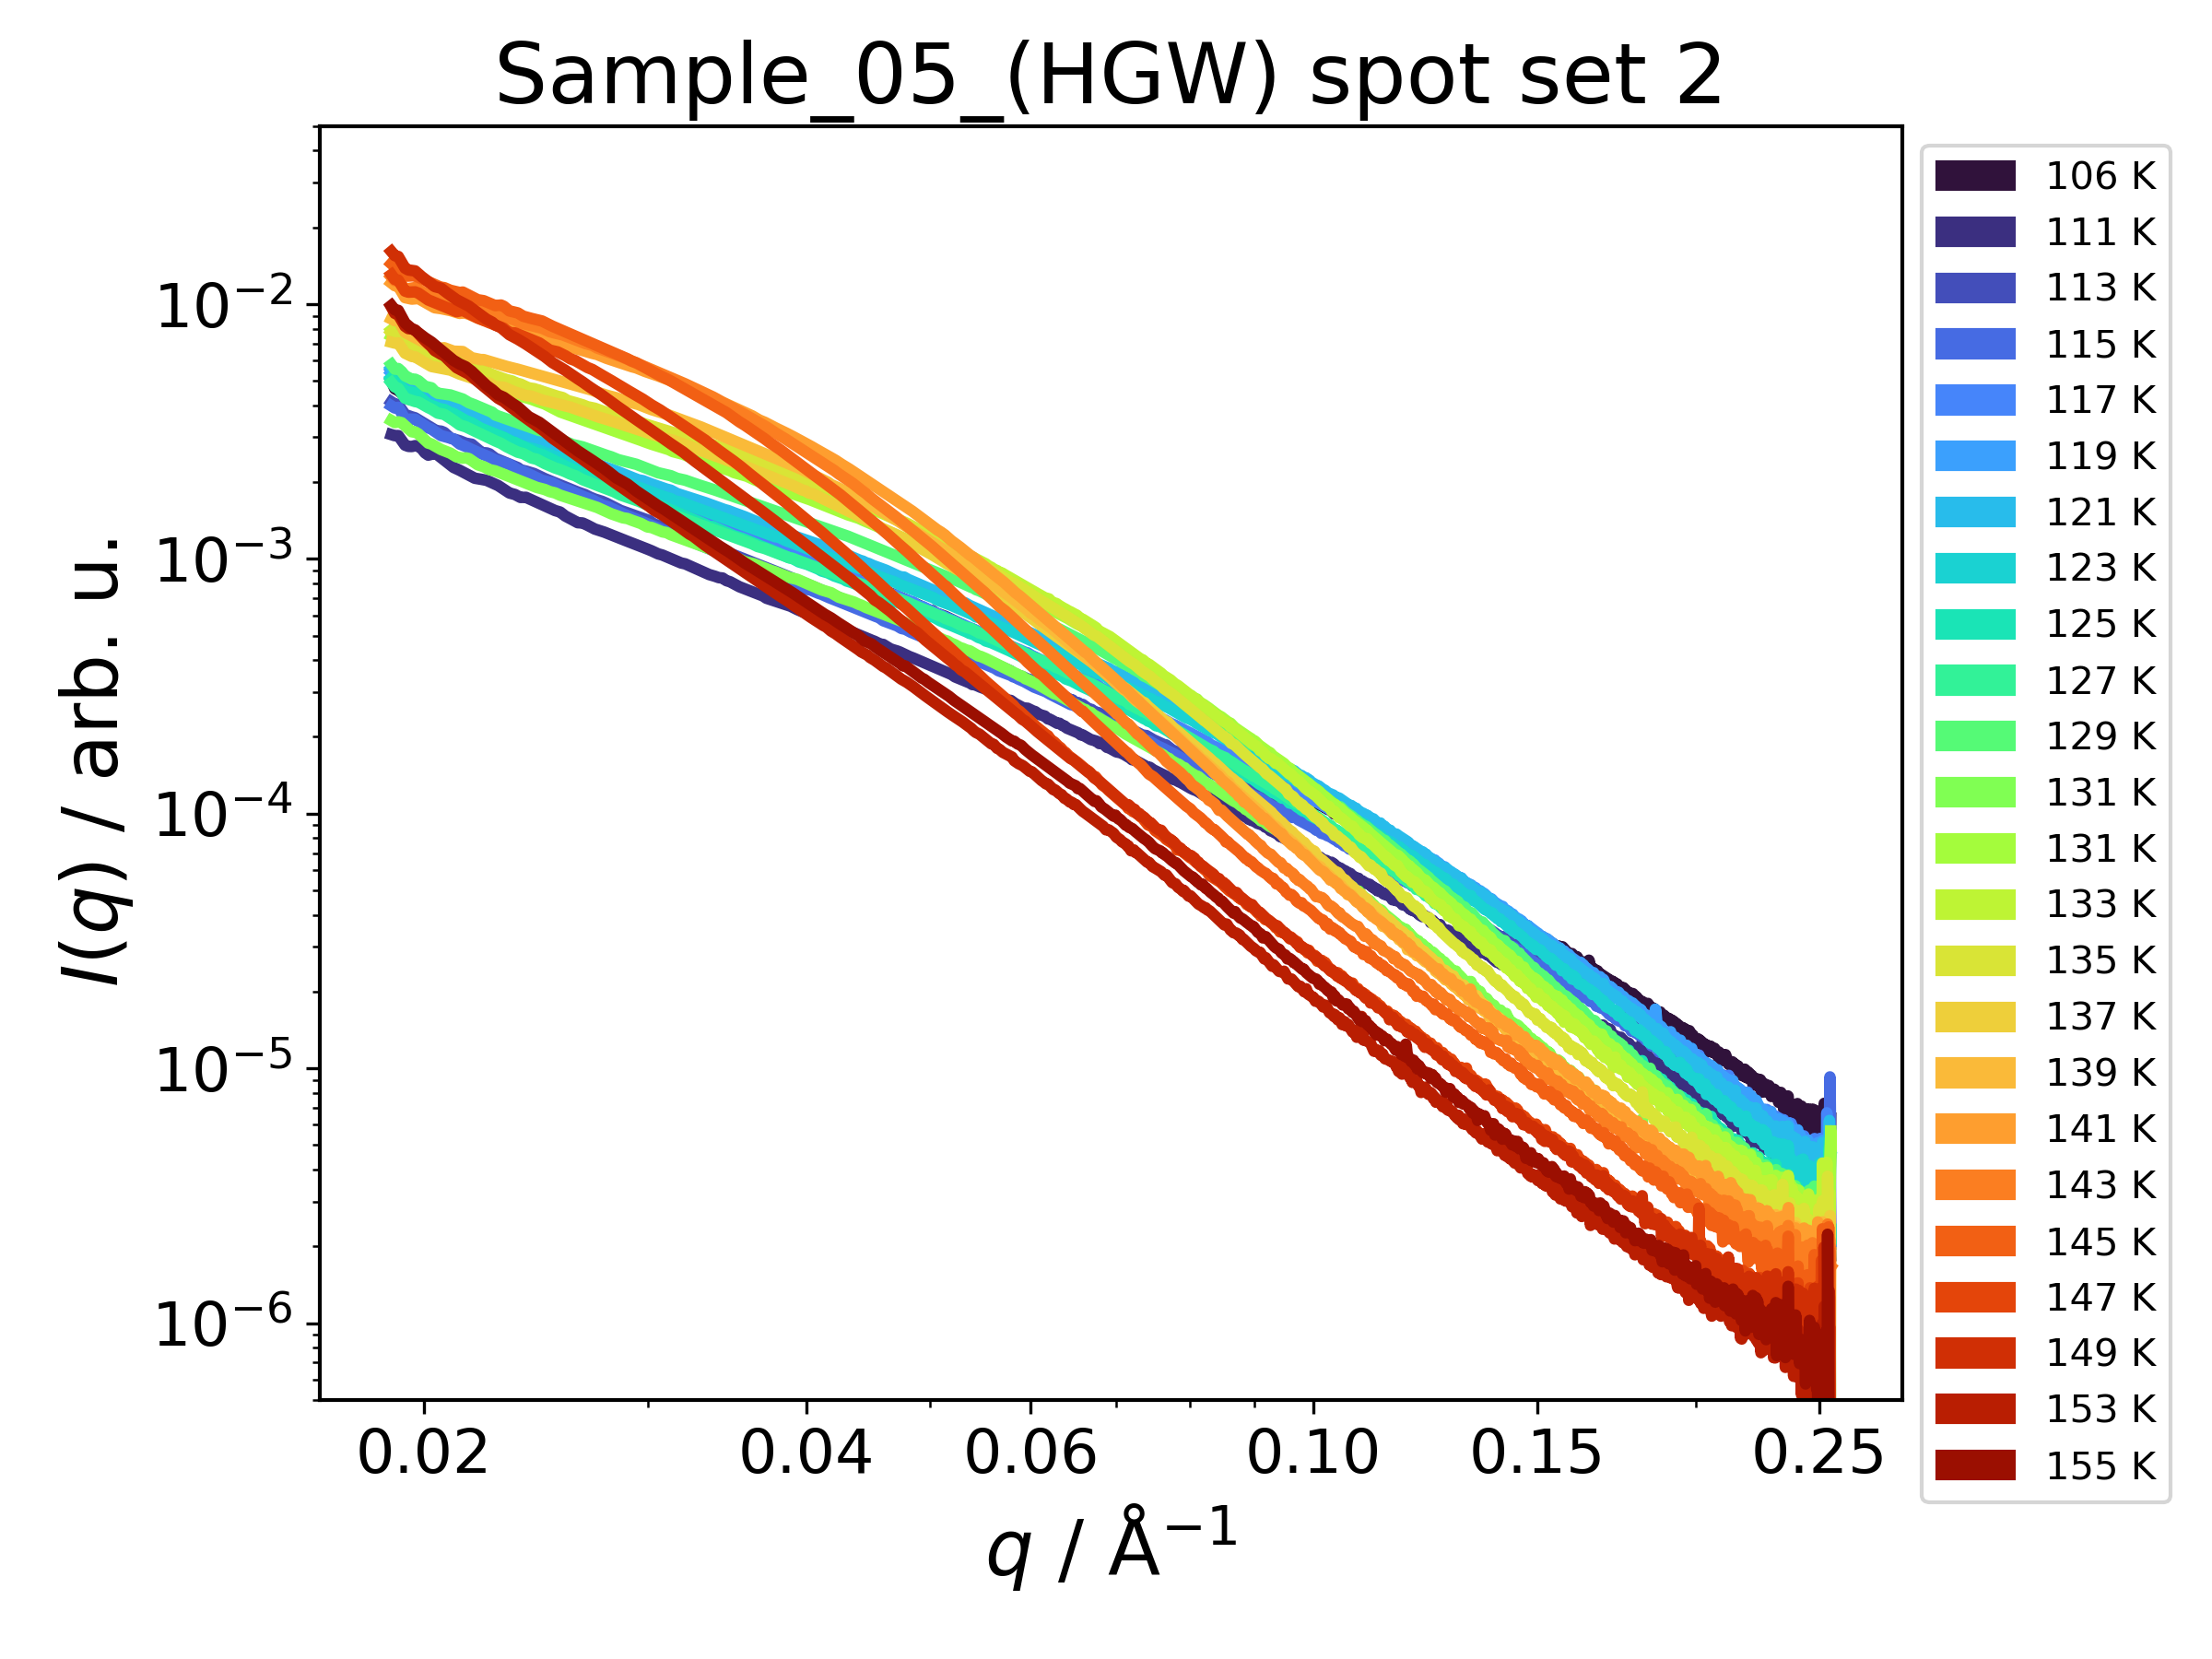

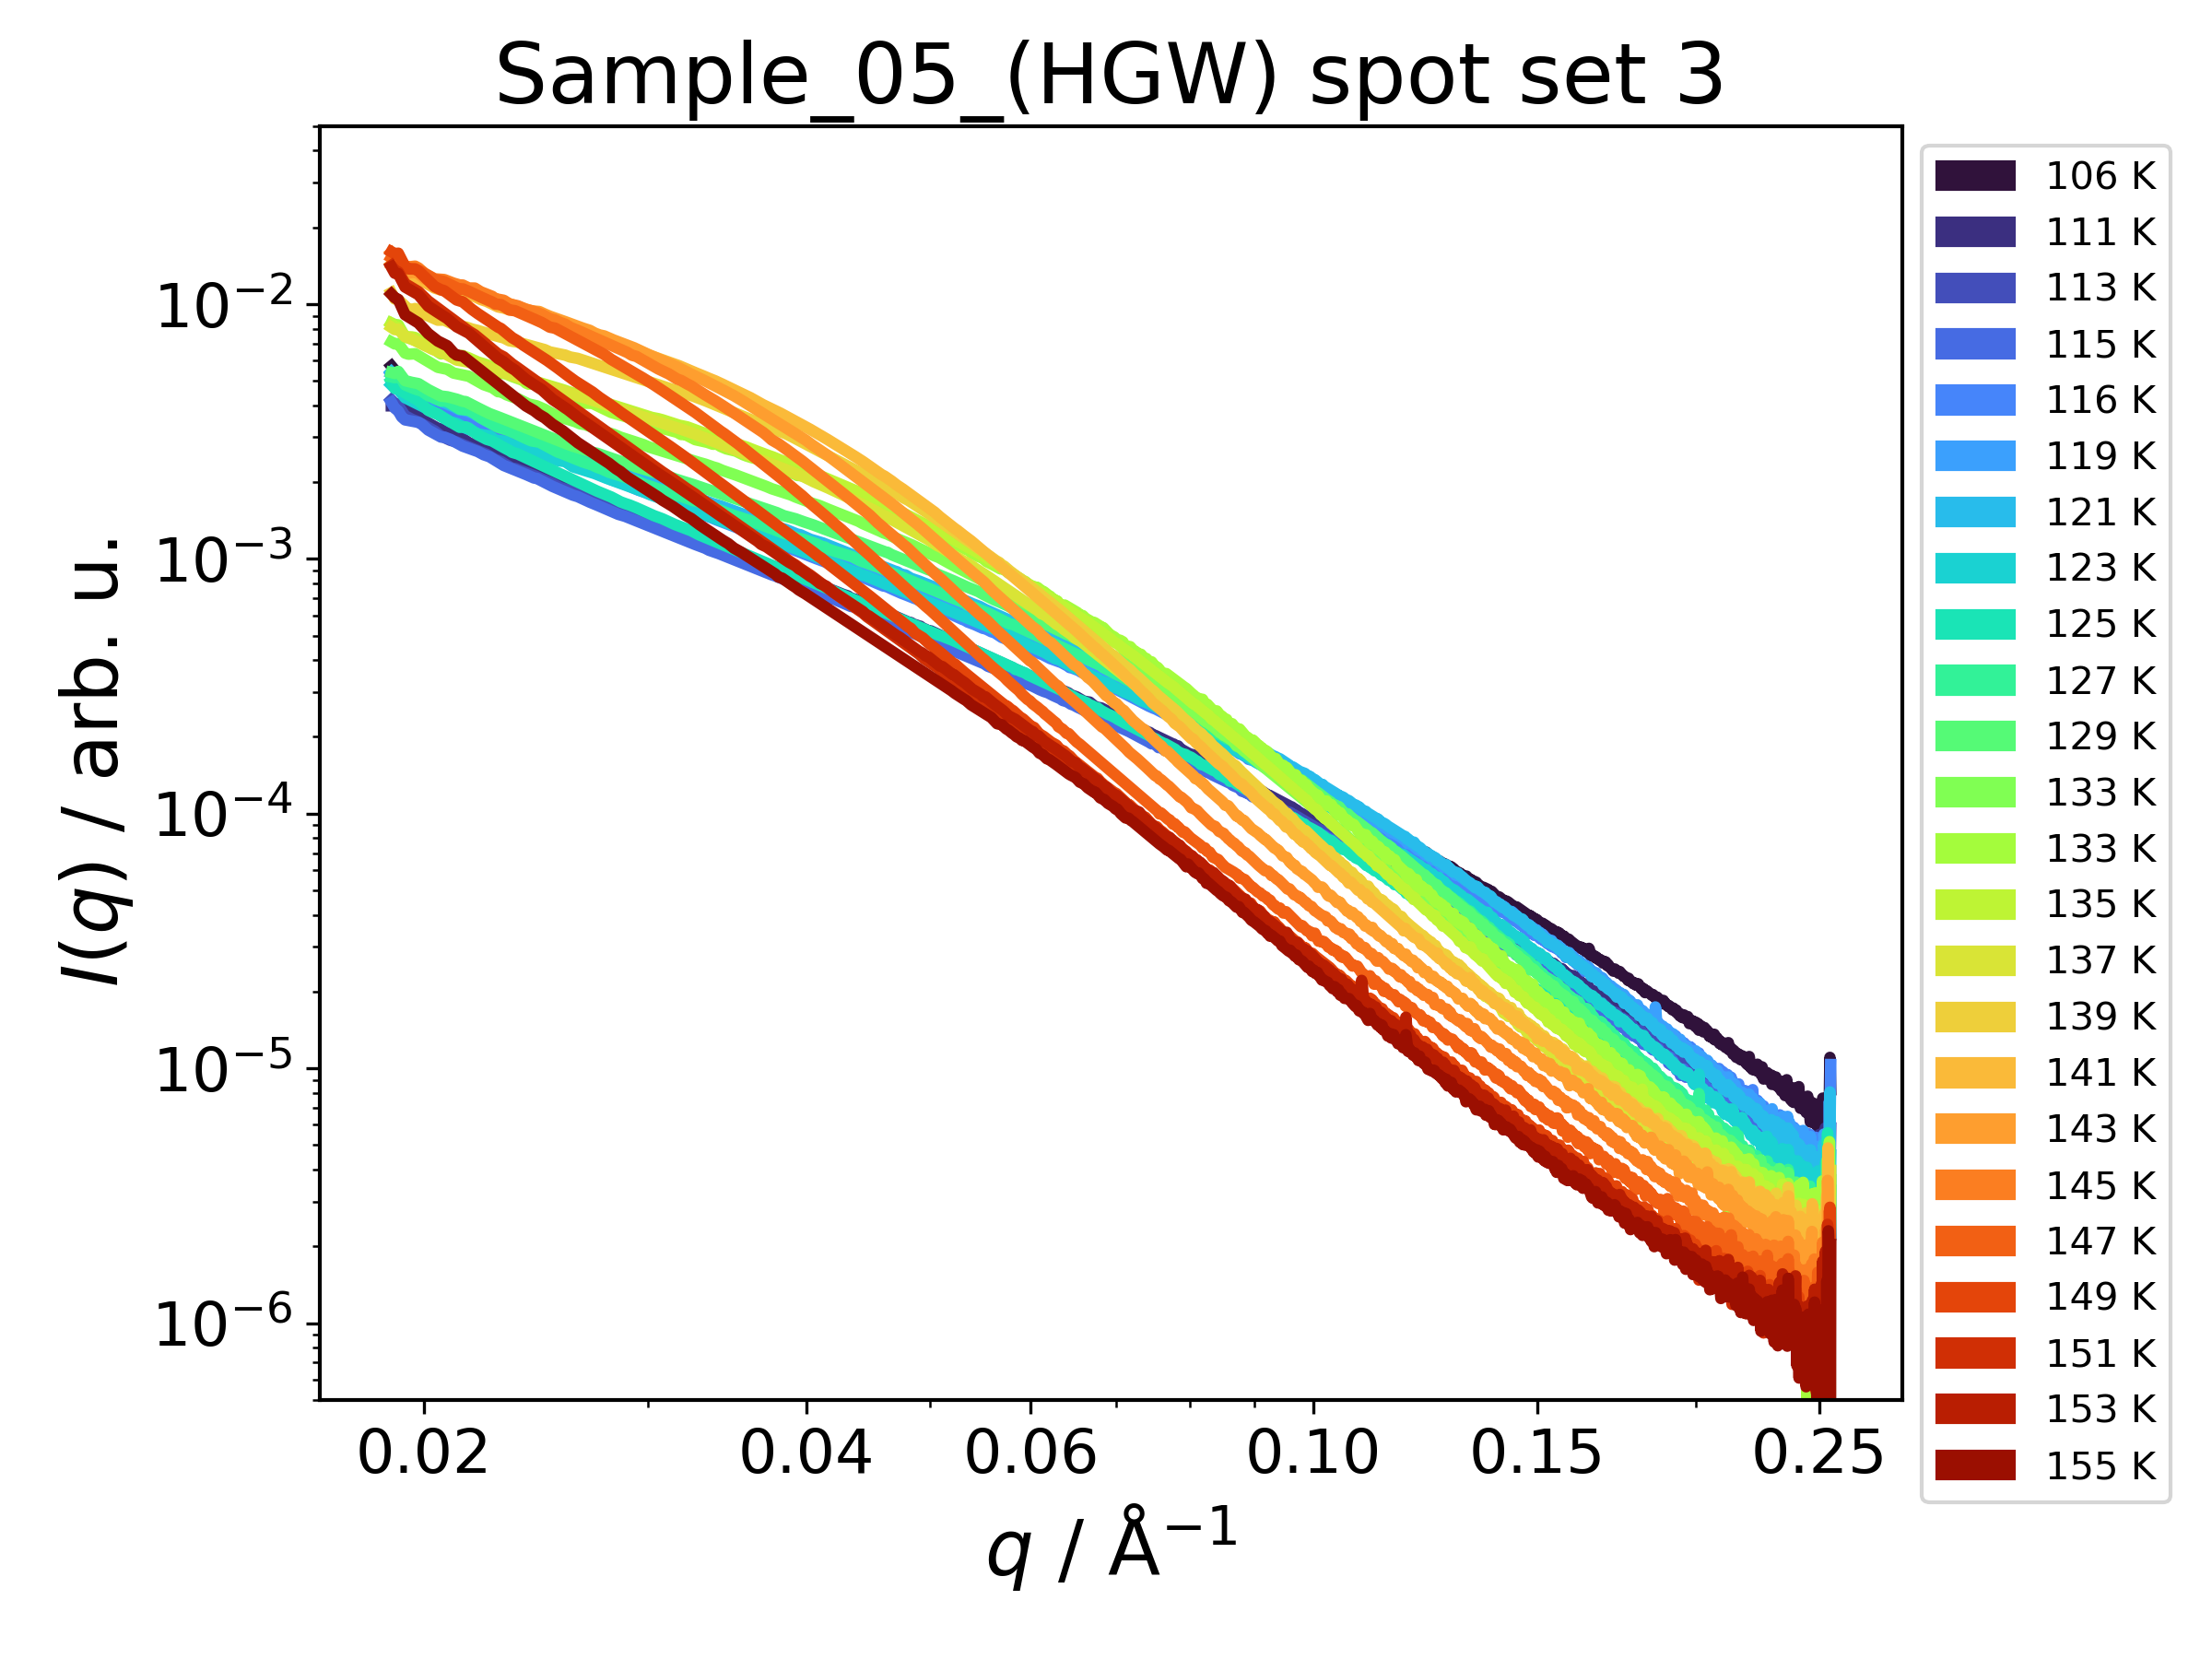


Avg. over single shots

Avg. over single shots

Avg. over single shots

Mesh Scan 3

Mesh Scan 1

Mesh Scan 2

**Figure S10:** Continued from previous page.

Figure S9 and S10 show the raw SAXS *I(q)* data for single-shot mesh scans (sample 05) and static exposure at 10 Hz (samples 02-04). Besides azimuthal integration and normalization using the intensity of the incident beam along with the processing pipeline of the MID instrument2, the data underwent no further treatment. We note that the data is not given on an absolute scale as the precise amount of illuminated sample is unknown. Therefore, the data are not normalized, where sample thickness varies slightly at different spots and/or temperatures. Large offsets in some of the *I(q)* curves indicate that, e.g., the sample has partly fallen out of the grid. Such data are excluded from analysis.

Most notably, all scattering profiles recorded for HGW show a Guinier knee at around ~0.8 Å-1 that shifts to lower *q* as the temperature is increased. Such knee is not observed after crystallization, and also not seen for the dHGW and LDA samples. This points to differences in the morphology between HGW and dHGW/LDA.

S6.2 Porod Scaling and Porod Constant


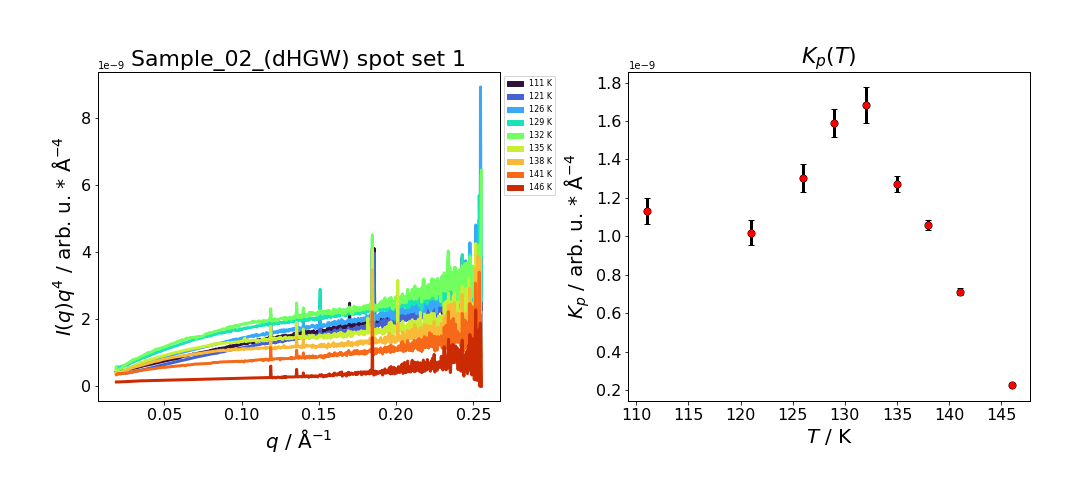

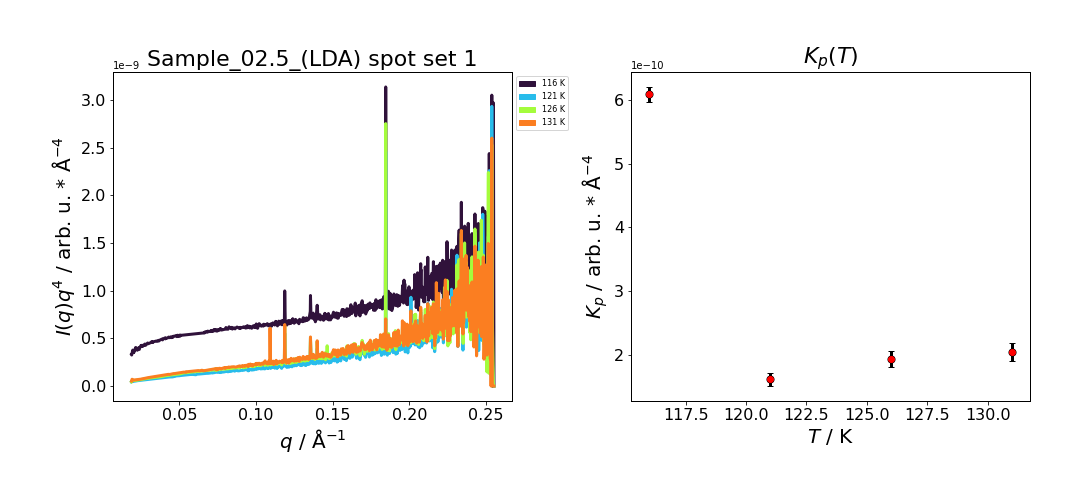

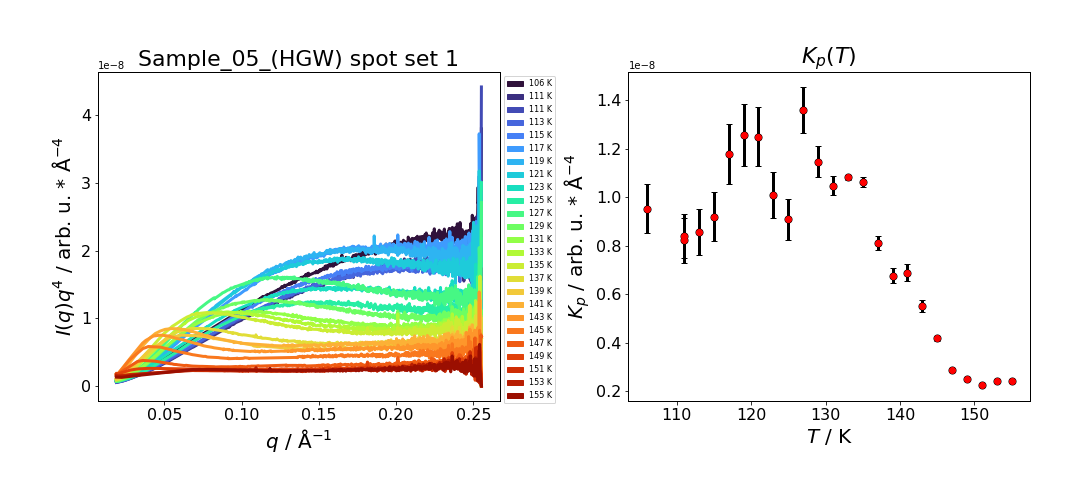

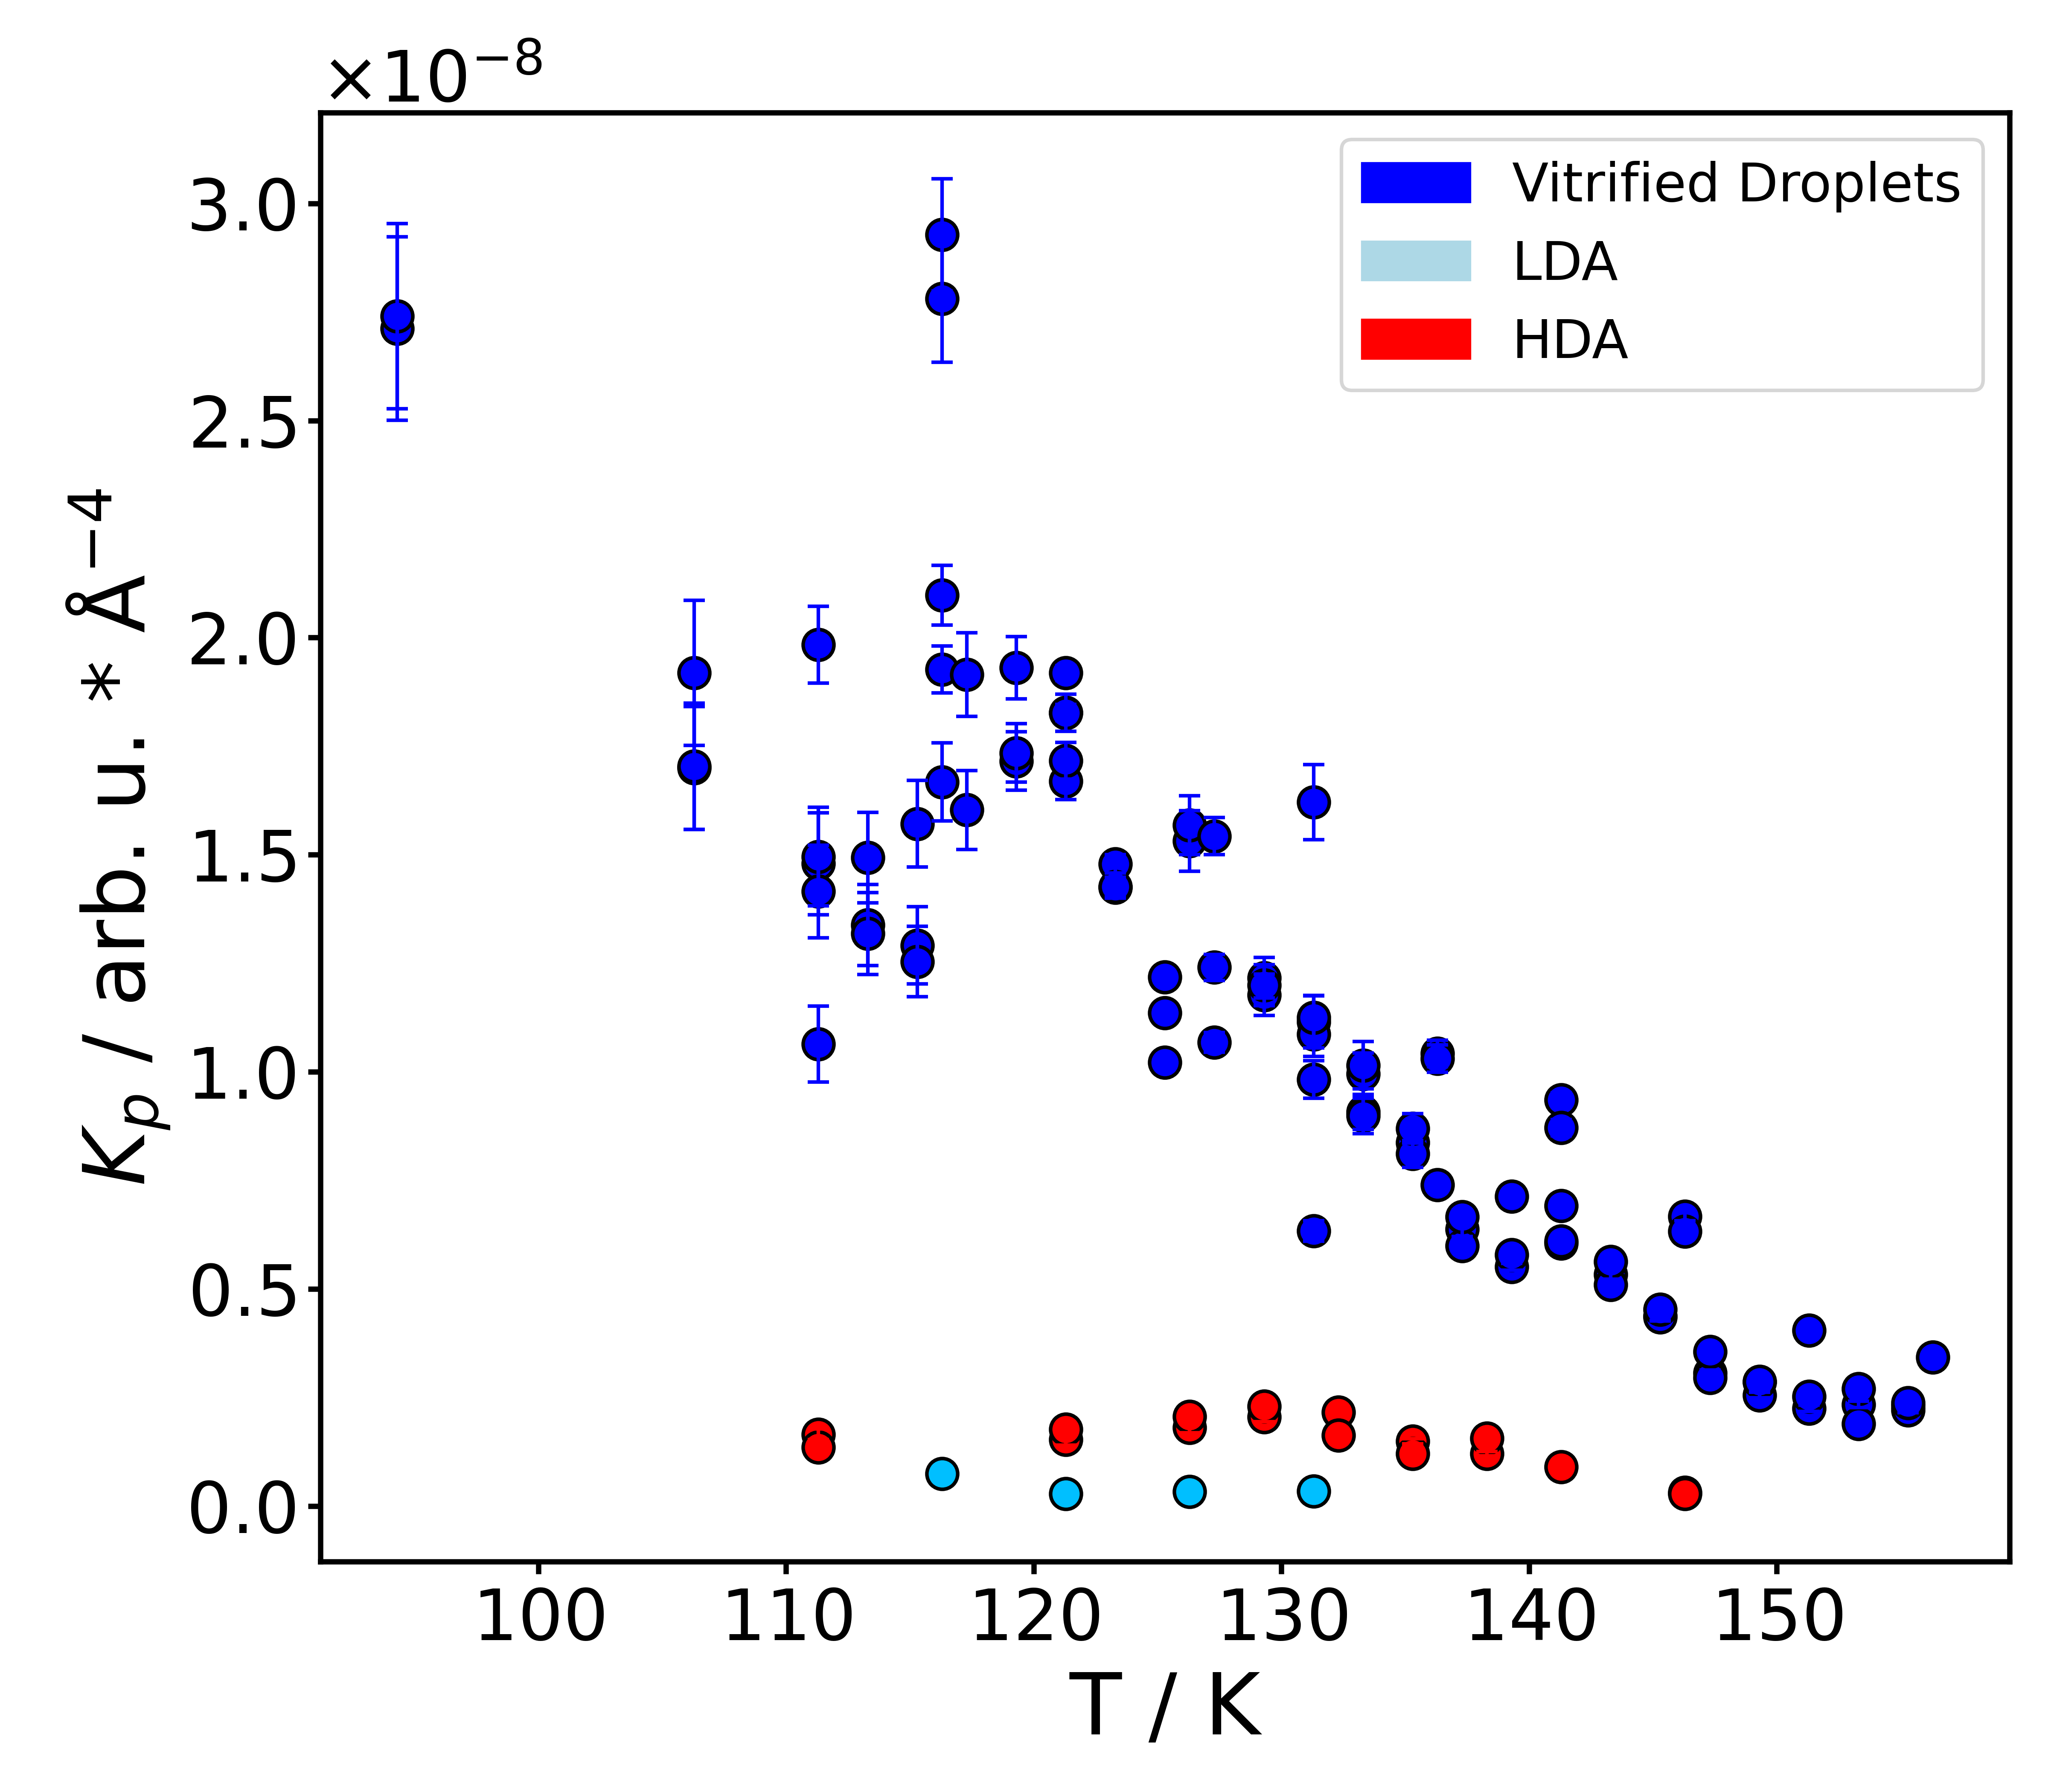


Mesh Scan 1

**D)**

**C)**

**B)**

**A)**

**Figure S11:** Panels A)-C): Selected SAXS profiles scaled by I(q)*q4 according to the Porod law for dHGW, LDA made from dHGW and HGW. Panel D): Porod constants Kp, determined from the scaled curves by reading off I(q)*q4 at the respective plateau, as a function of the temperature for all samples.

Small angle scattering profiles can often be described as a power law in the high-*q* limit according to Porod’s law12 (equation S1).

(S1)

Here, *Kp* is the Porod constant, *m* is the Porod exponent, and *B* is the background. *Kp* is defined according to equation S2 and is proportional to the surface to volume ratio *S/V* as explained in the methods section of the main text.12

(S2)

Equation S2 implies that scaling *I(q)* by *q4* (also called Porod scaling) should lead to a plateau at large *q* values (in our case *q* > 0.125 Å-1). Figure S11 shows the Porod scaled *I(q)* data of three exemplary samples from figure S10 along with the *Kp* values as a function of the temperature. In all cases *Kp* was calculated by reading off *I(q)*q4* at the corresponding plateau.

HGW (Figure S11C) shows a clear plateau of *I(q)*q4* at *q* > 0.125 Å-1, indicating the validity of applying Porod’s law on this data. The plateau clearly moves to lower *I(q)*q4* values when increasing the temperature, leading to decreasing *Kp* values. *Kp* is proportional to the surface to volume ratio which means that for HGW the surface to volume ratio decreases with increasing temperature.

dHGW (HDA) and LDA (figure S11A/B) also show such plateaus but much lower *Kp* values with a much weaker change upon heating when compared to HGW. This implies that the surface to volume ratio changes less when compared to HGW. Even though the *I(q)* data is not normalized on the illuminated sample volume (or sample thickness), this inference is likely to be true since the sample thickness is similar for all samples (see section S1). To remove the effect of varying sample volumes, we applied a normalization procedure which is described in section S6.3.

# *S6.3 Normalization of SAXS I(q) and Calculation of the Surface to Volume Ratio*

For calculating the surface to volume ratio, the SAXS *I(q)* was normalized to the intensity of the forward scattered beam *I(0)*. Since *I(0)* was not measured directly, we had to calculate it from the available *I(q)* data. Therefore, a fit of the classical Guinier model12 (equation S3) was applied in the low-*q* range of the scattering profiles (*e.g.* 0.025-0.035 Å-1; depending on the sample).

(S3)

Here, *Rg* is the radius of gyration. Figure S12 shows an example of such a Guinier fit for HGW.


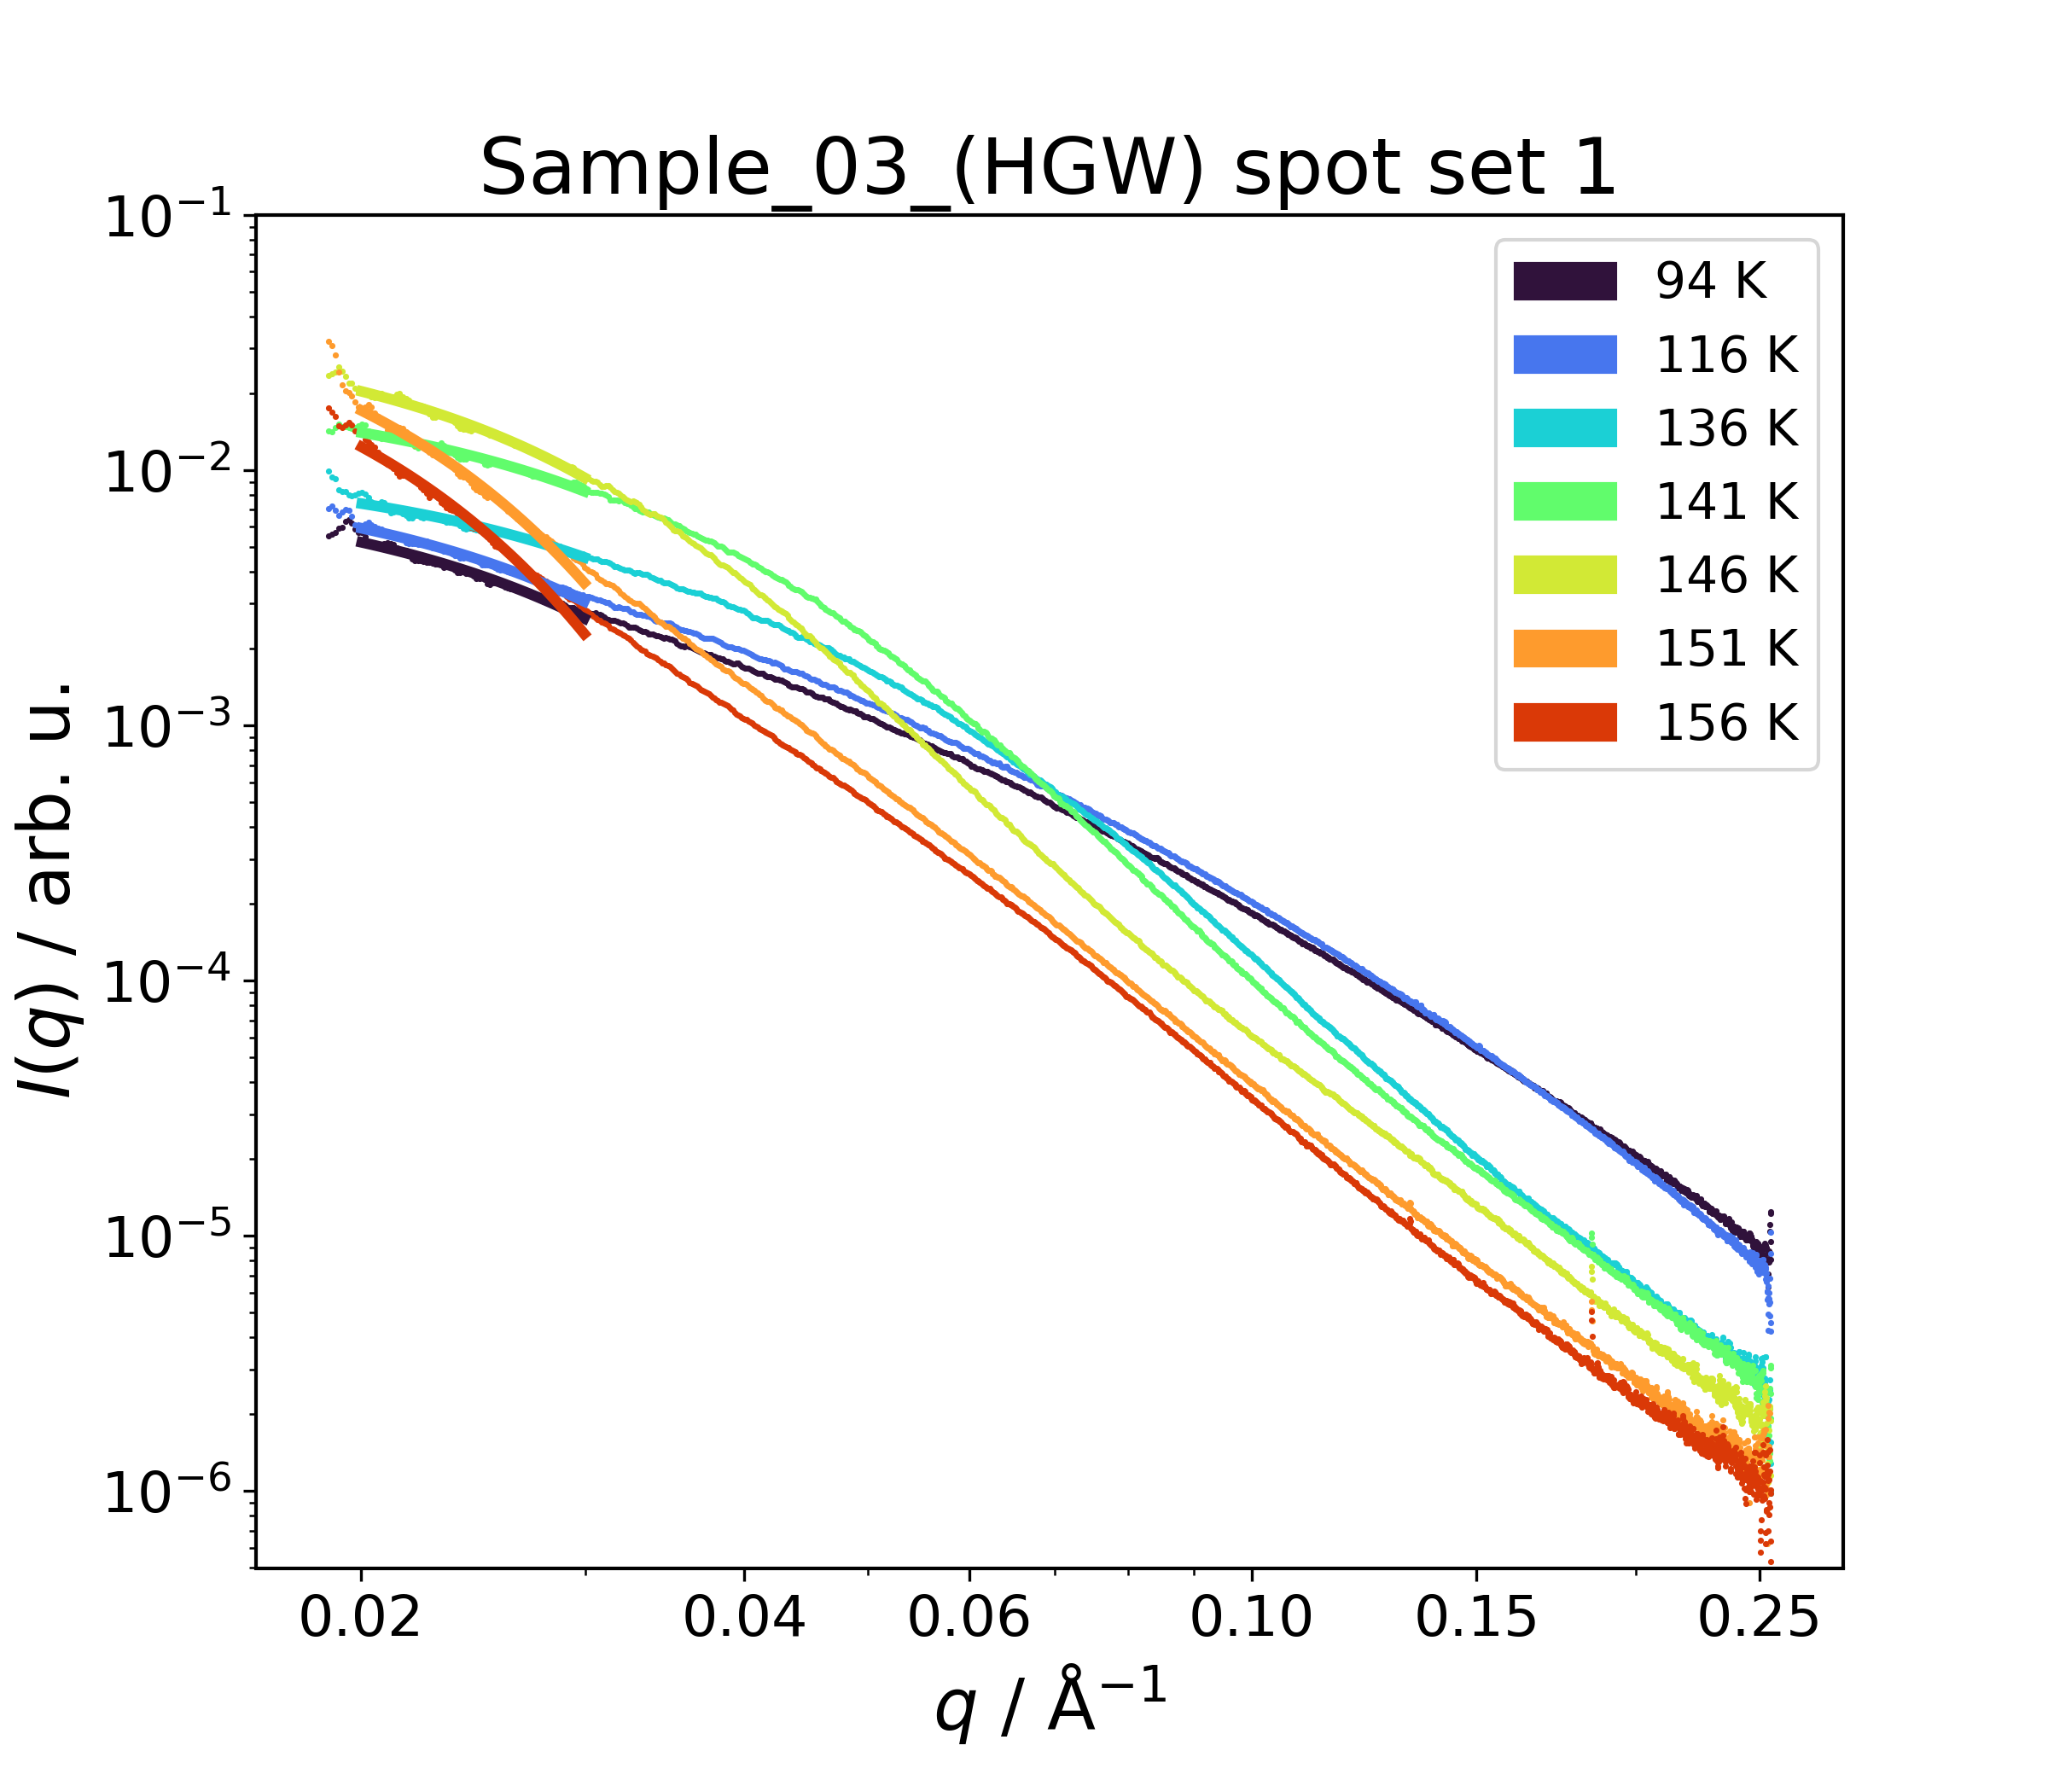


**Figure S12:** Exemplary SAXS I(q) of HGW including Guinier fit according to equation S3. The fits are shown as bold lines.

*I(0)* can now be acquired by extrapolating the Guinier fits to *q* = 0. Normalization also requires knowing the forward scattering intensity *I(0)lit* in absolute units (*i.e.,* units of inverse length) as shown in equation S3 where *I(q)abs* is the normalized intensity on an absolute scale.

(S3)

*I(0)lit* was calculated using equation S413 where is the scattering length density (9.388 * 1010 cm-2 for water)14, *k* is the Boltzmann constant, *T* is the temperature, and *κT* is the isobaric compressibility.

(S4)

*κT* for HGW or even LDA is currently unknown which is why the compressibility of hexagonal ice was used instead. This is a valid approximation given the similarities in local structure and density between LDA type amorphous ices and ice I. In ref. 15, equation S5 is presented to calculate *κT* of ice Ih at a given temperature.

(S5)

Using this equation, *κT* was calculated at all sample temperatures. Using these values, *I(0)lit* was calculated at each sample temperature.

Finally, each scattering profile was normalized (*i.e.,* converted to *I(q)abs*) by multiplying the raw scattering profile *I(q)* with the normalization factor *I(0)lit/I(0)* according to equation S3. For that, the *I(0)* obtained from the Guinier extrapolation of each raw scattering profile and the *I(0)lit*, calculated for the corresponding sample temperature according to equation S4, was used.


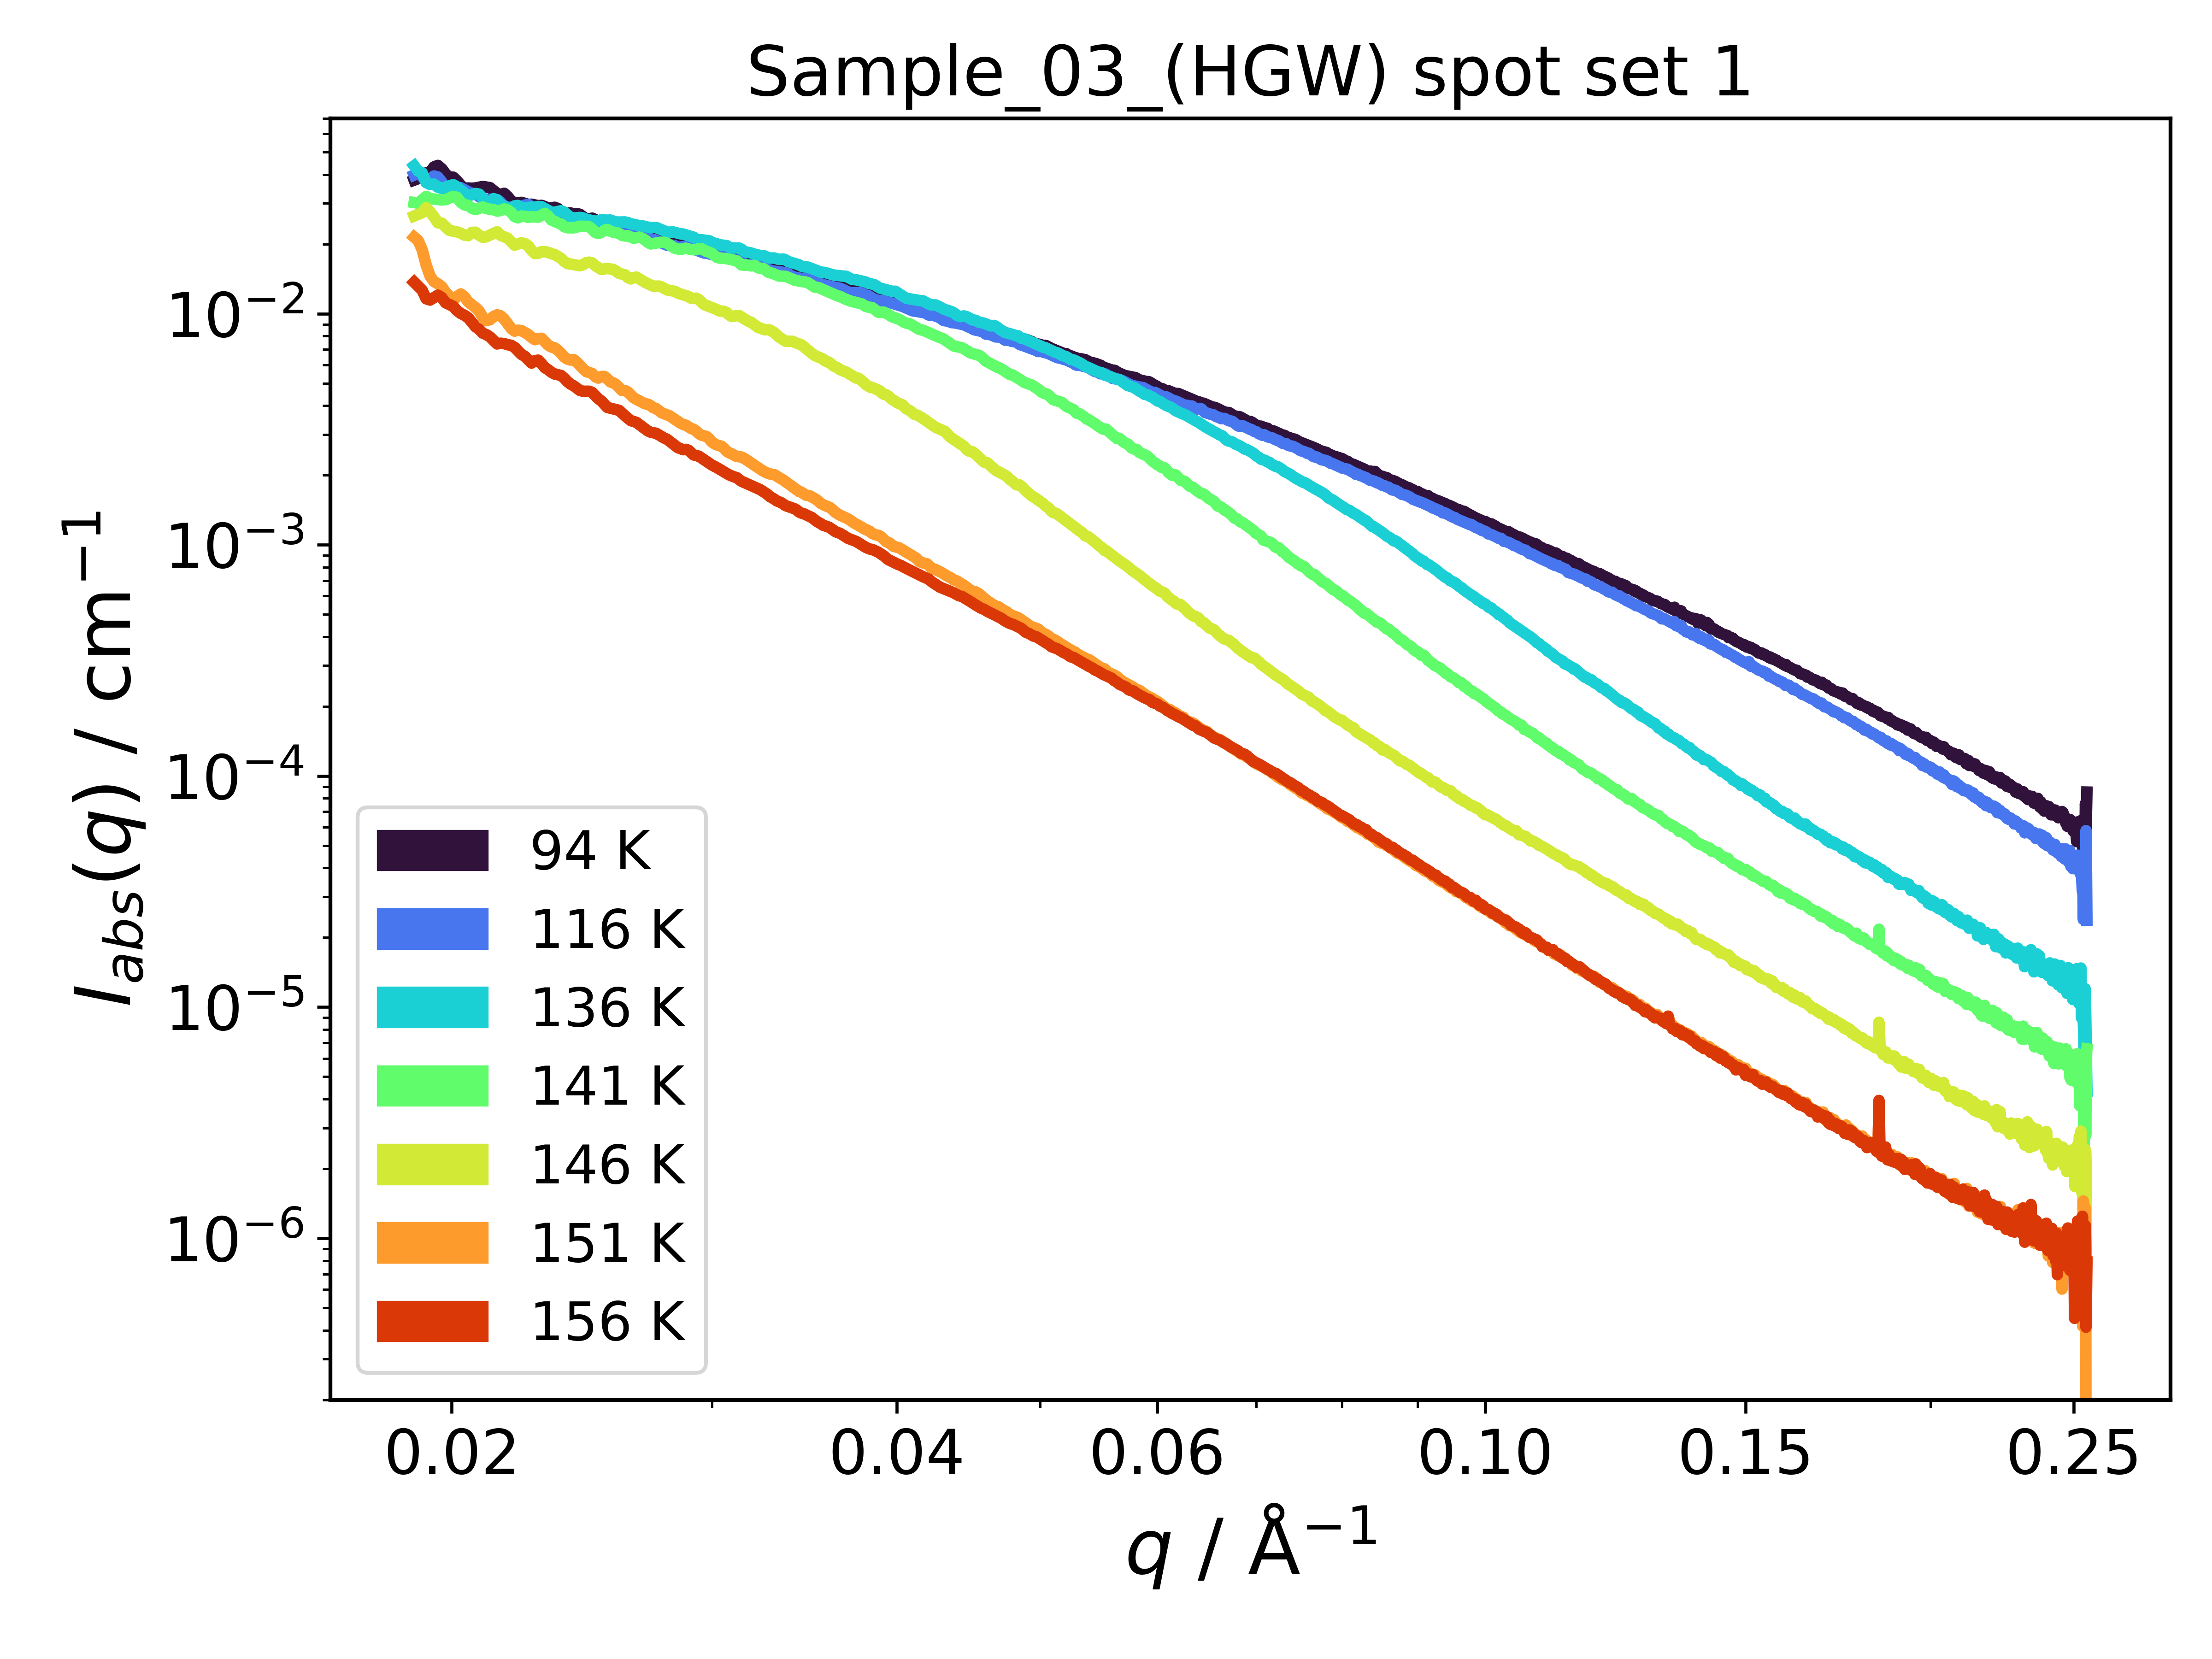


**Figure S13:** Exemplary Normalized intensity I(q)abs of HGW. The normalization procedure is explained in detail in the text.

Figure S13 shows an exemplary set of normalized scattering profiles for HGW. This normalization procedure does remove the effects of varying illuminated sample amounts as can nicely be seen by comparison of the raw *Kp* values (figure S11) and the ones obtained from the normalized profiles (see figure 2A in the main text). The latter values scatter less and all lie on a well-defined curve regardless of the sample amount. However, this procedure heavily relies on the assumption that the classical Guinier law is followed, that equation S4 holds for HGW, and that *κT* of hexagonal ice I is the same for HGW. Due to the complex morphology of the sample, especially the first assumption may only apply partially. For this reason, the resulting surface to volume ratio should not be taken as absolute values which is why we only look at relative changes.

For calculation of the surface to volume ratio, the Porod constants *Kp,abs* of the normalized scattering profiles were calculated according to equation S6. More precisely, *Kp,abs* was determined by reading off the value of *I(q)abs q4* at the plateau which is the same procedure as used in section S6.2.

(S6)

From that, the corresponding surface to volume ratios were calculated using equation S716.

(S7)

For relative comparison of the obtained surface to volume ratios, the values were normalized with respect to the initial value (before heating) at 94 K. These relative *S/V* values are shown in figure 2A in the main text.

S6.4 Fit of I(q) Using a Guinier-Porod Model

As mentioned in the methods section of the main text, a generalized Guinier-Porod model developed by Hammouda17 was fitted to the raw small-angle I(q) data to yield additional information on sample morphology. A short description of the model is given in the methods section of the main text.


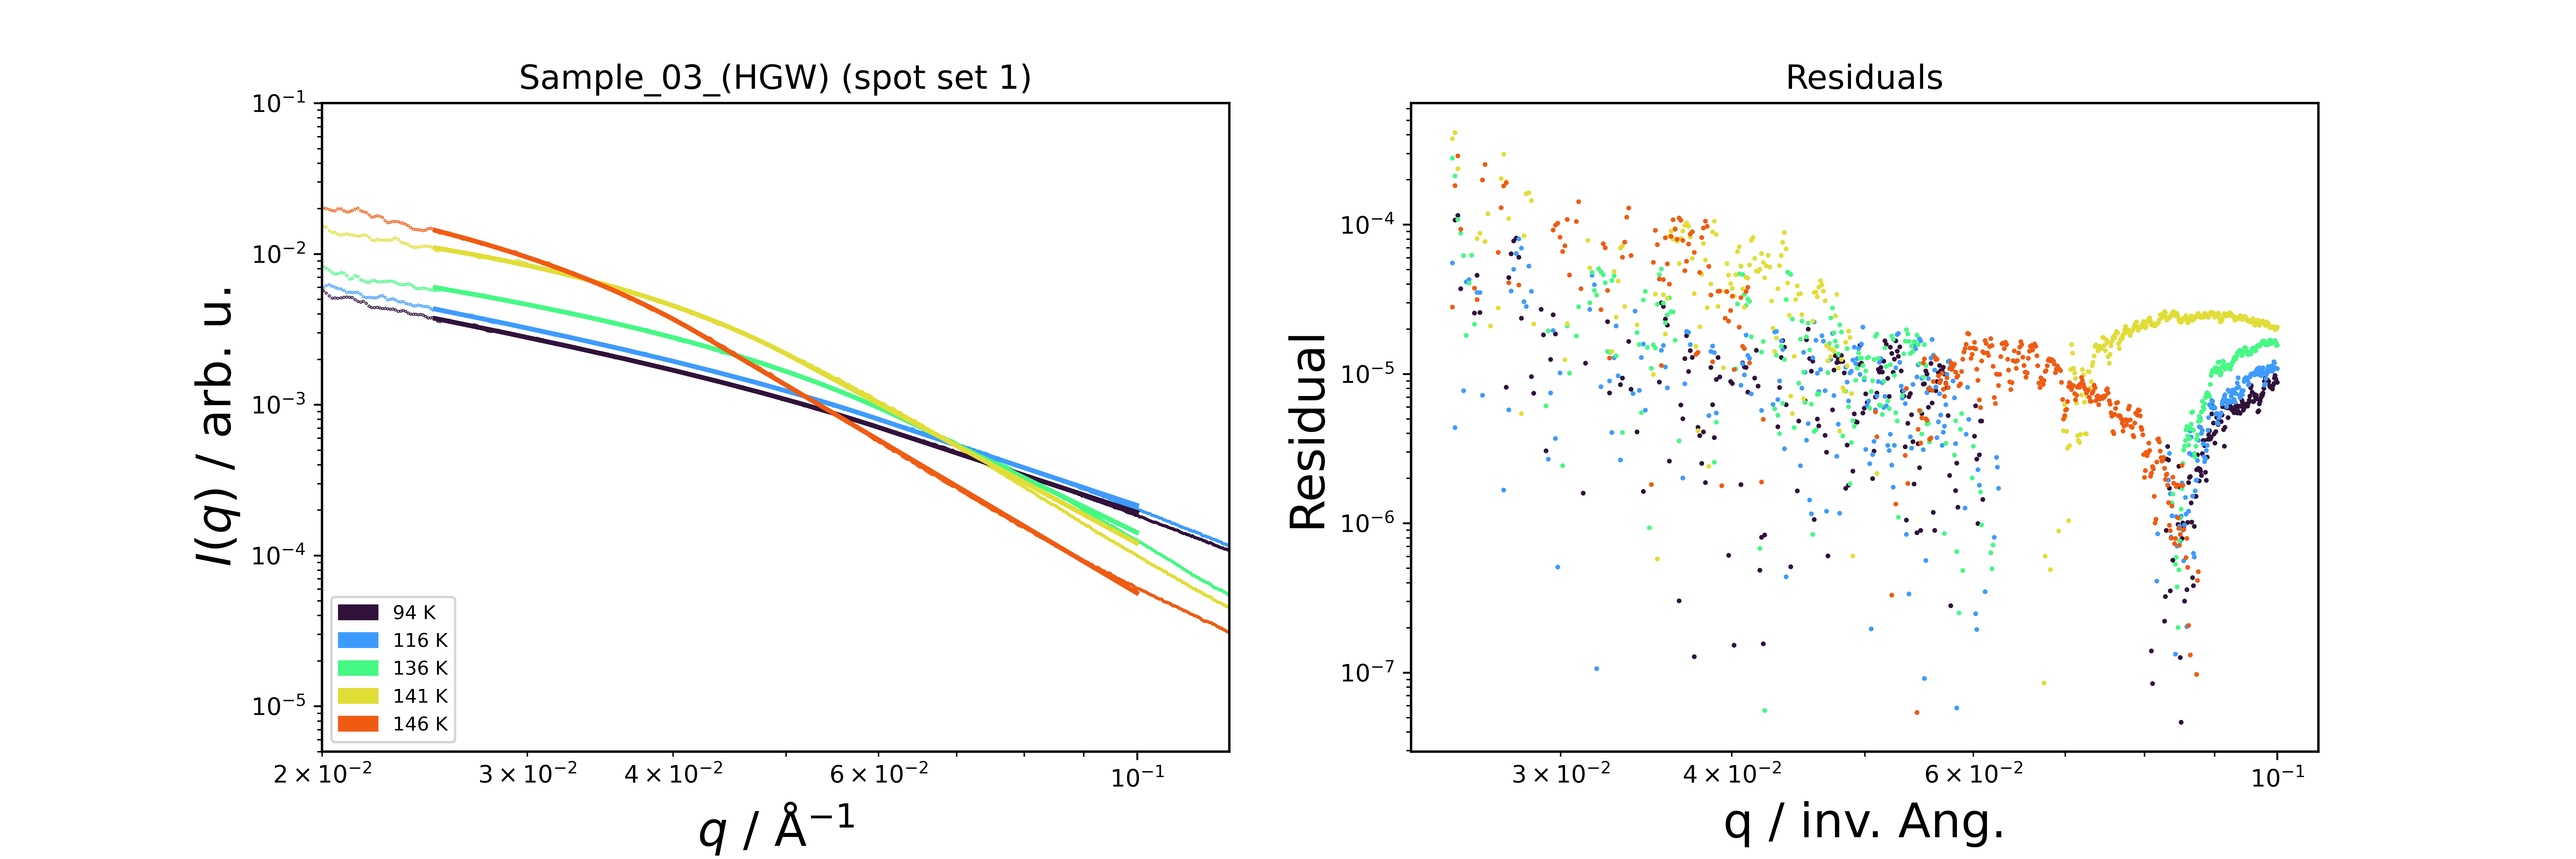


**Figure S14:** Exemplary Normalized fits (bold lines) of the Guinier-Porod model by Hammouda17 to the raw small-angle I(q) (thin lines) of a HGW sample.

Figure S14 shows exemplary fits of this model to the small-angle I(q) data for a HGW sample. Obtaining reasonable fits required to restrict the fitted q-range to 0.025-0.1 Å-1. The parameters from the fit, including error bars, are shown in figure 2B-D in the main text.

# S7 Supplementary SEM Data

The fast scan rate of the SEM (20s per micrograph) allows tracking changes of the sample’s morphology over time. Movie S1 (see ‘MovieS1.mp4’ in the supplementary information folder) shows the sample’s surface over the duration of 5 min at each temperature (except for 77 K, there the duration is 2.3 min). At 77 K, the droplet interfaces are clearly visible and besides a small drift, no pronounced temporal changes are visible. More specifically, the observed morphological features are retained over the full measurement time, indicating the absence of flow at these timescales. This is still the case even after heating to 120 K. Upon further increasing the temperature to 125 K, the morphology changes drastically when compared to lower temperatures. More specifically, the surface evolves with time indicating flowing of the sample. Along with that, the droplet interfaces disappear (see also figure 2 in the main text), implying that the onset of liquid dynamics causes the vanishing of these interfaces. At 145 K, the sample’s surface looks almost like a boiling liquid. We assume At this point water is evaporating in the high-vacuum environment and creating bubbles in the liquid matrix which appears to have rather fast dynamics. This changes drastically after heating the sample to 155 K where it crystallizes. In contrast to the previous temperature, no macroscopic dynamics are observed anymore. This rapid slowing down caused by crystallization corroborates the idea that the amorphous state from which ice I crystallizes is a viscous liquid.

Figure S15 shows figure 3 from the main text without highlighted droplet interfaces.


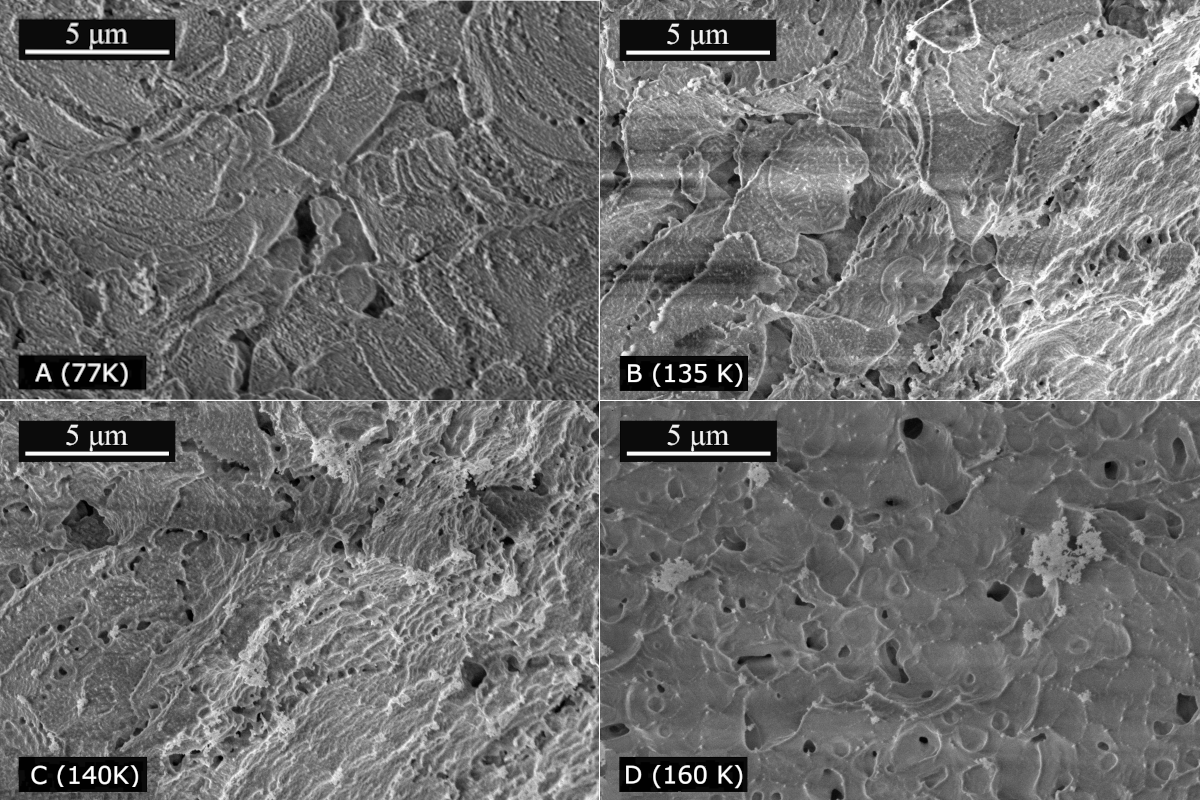


**145 K**

**125 K**

**120 K**

**77 K**

**Figure S15**: Figure 3 from the main text without highlighting of the droplet interfaces.

# S8 Preliminary Measurements and Tests at P10 (PETRA III, DESY)

Prior to the experiments at the MID instrument at European XFEL, we tested the sample environment and preparation procedure during a beamtime at P10 (PETRA III, DESY; Proposal T-20220749 EC). A similar WAXS/SAXS setup as described in the methods section of the main text was used. More precisely, we used a beam focused on a 12 x 16 µm spot with a photon energy of 8.7 keV and a flux of 4 x 1010 photons per second, attenuated by silicon absorbers to prevent beam-induced effects. The WAXS was detected by an Eiger 500K and the SAXS using an Eiger X4M detector. The data were acquired for 1000 s each at a detector refresh rate of 1 Hz. The sample environment (Janis cryostat) was identical to the one used at MID.

Initially, we powdered HGW and sandwiched it between two diamond windows, which were mounted on the cryostat. Since this process has to be conducted under liquid nitrogen, loading the sample that way takes quite long (> 20 min). As seen from the pronounced Bragg peaks in the WAXS data (figure S16), a substantial amount of ice I condensed on the sample during this procedure. However, these impurities have to be minimized to ensure that effects that are studied originate from the glassy part of the sample.

**
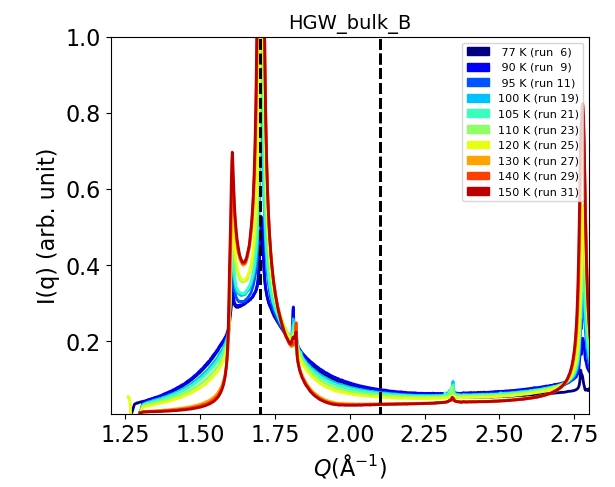
**

**Figure S16:** Preliminary WAXS data from P10 of powdered HGW sandwiched between diamond windows (~10-15 K temperature offset).

To facilitate the loading procedure, we moved to using grids on which the sample is already pre-loaded. More precisely, HGW powder was pressed into the holes of a Cu grid (200 µm thick, 10 mm diameter) using the exact same procedure as described in the methods section of the main text (also see figure S1). Besides other advantages like consistent sample thickness and improved thermal contact, this procedure minimizes the amount of ice that condenses on the sample during loading. This is confirmed by the WAXS data shown in figure S17 where much less intense Bragg peaks of ice I are observed when compared to figure S16. Additionally, the sample stays amorphous until at least 130 K (not corrected for the ~16 K temperature offset) which provides a large temperature range to study coalescence, especially because this range includes water’s glass transition temperature at 124-136 K.


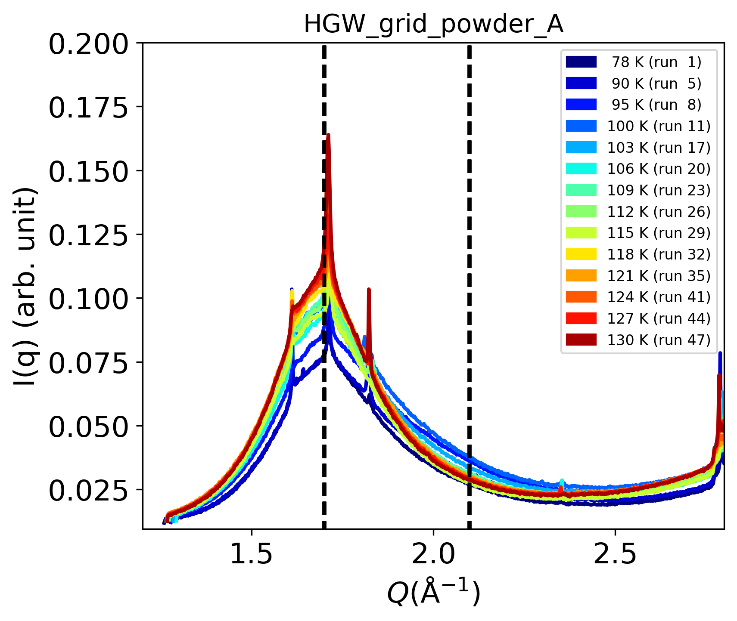


**Figure S17:** Preliminary WAXS data from P10 of powdered HGW pressed on a Cu grid (200 µm thick, 10 mm diameter). The temperature offset is ~10-15 K.

Preliminary SAXS data using a grid sample (powder pressed into the grid holes) is shown in figure S18. The raw *I(q)* data shows that especially for very low temperatures (close to liquid nitrogen temperature), the ‘knee’-like feature is partly outside the upper end of the SAXS *q*-range of 0.1 Å-1. This is an important observation for setting a suitable *q*-range for the MID experiment. Additionally, an unexpected trend upon heating is observed for the Porod-scaled data: A decrease in *S/V* is usually indicated by a decrease of *I(q)*q4* in the high-*q* limit. However, we here observe an increase followed by a decrease which not consistent with the idea of droplet coalescence. This is because the procedure of pressing the HGW powder into the grid already causes coalescence/sintering of the sample before it is even inside the cryostat at the beamline. For this reason, we switched to directly depositing HGW on thin Cu grids as described in the methods section of the main text for the experiment at MID. This ensures that HGW is measured in its native state.


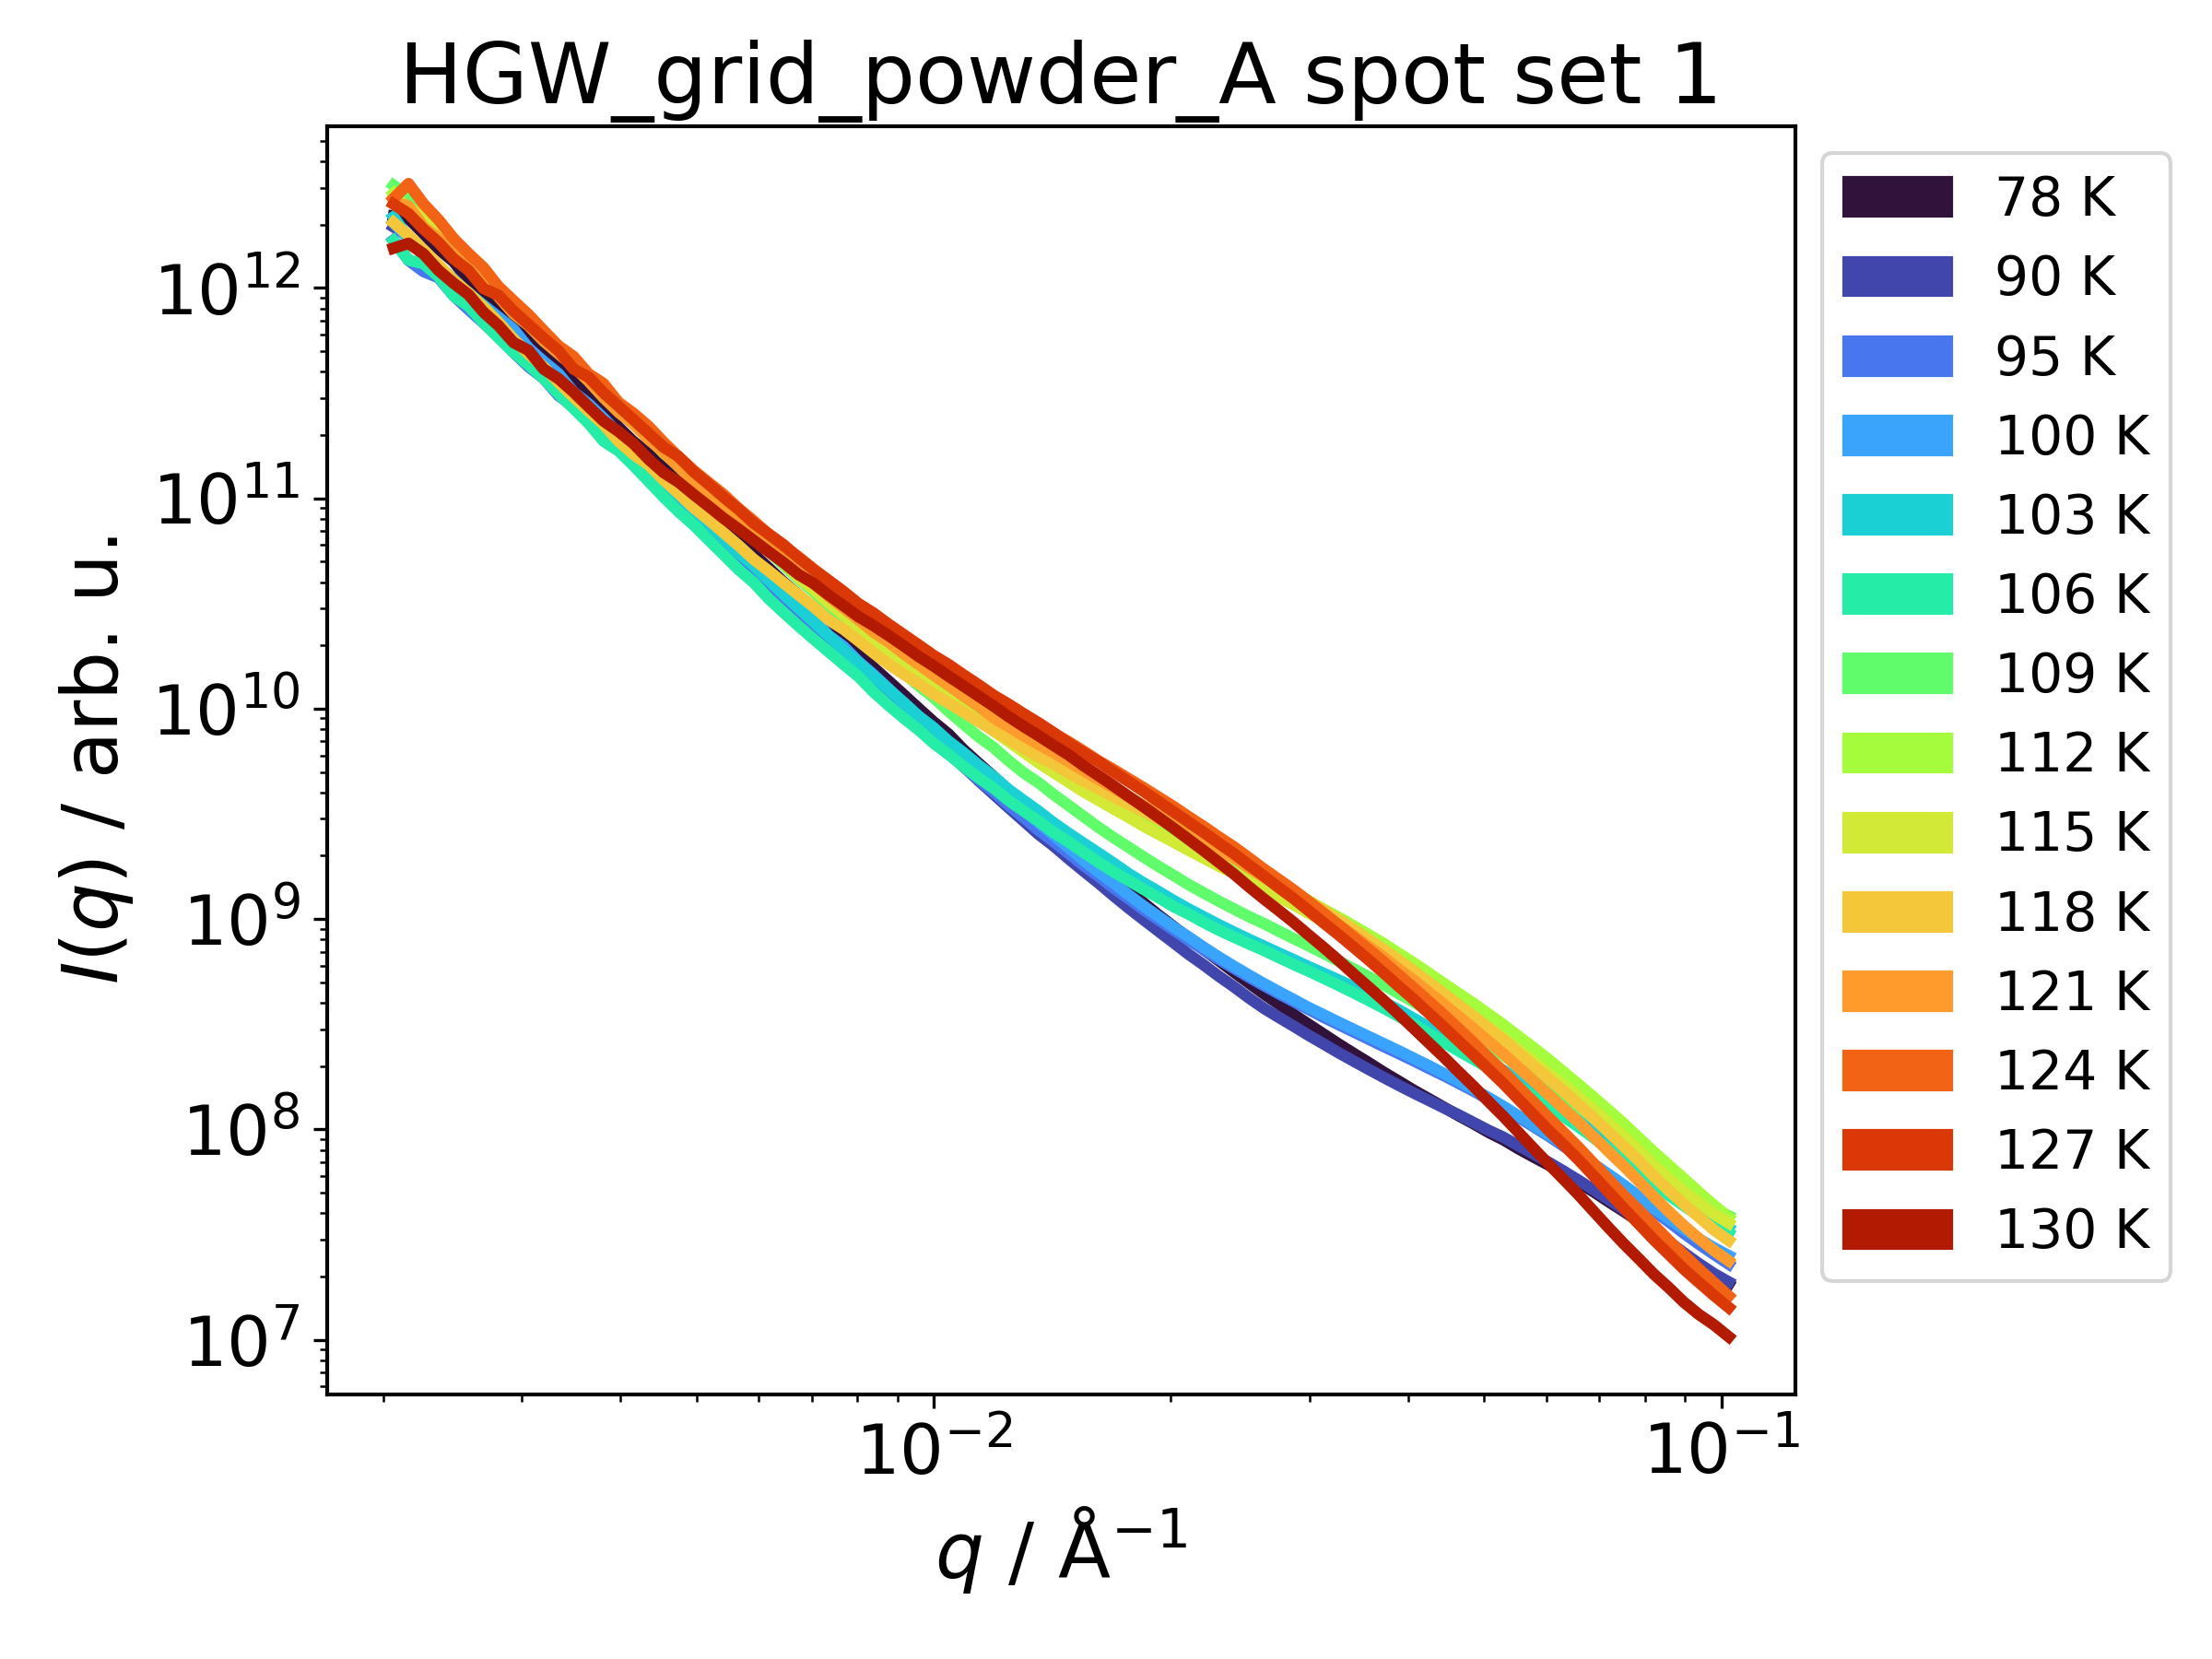

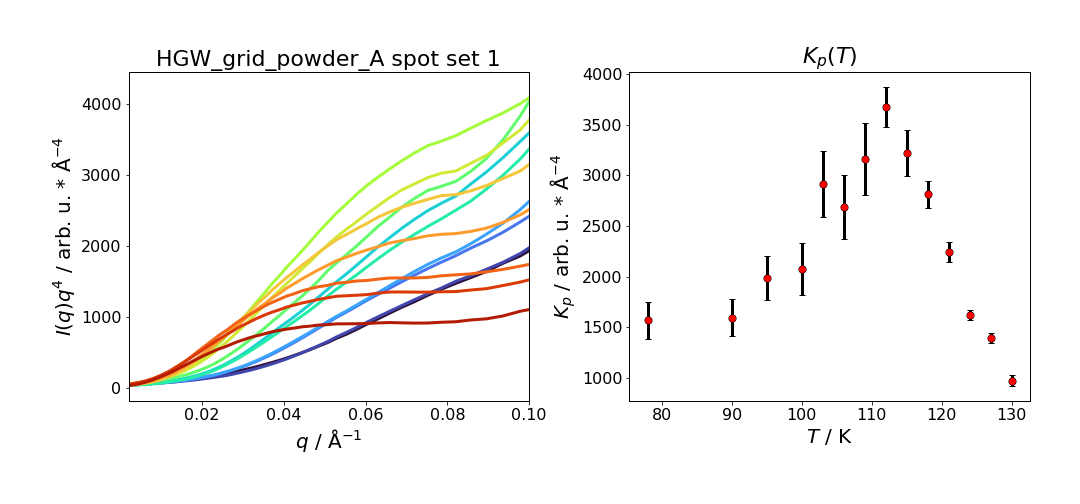


**Figure S18:** Raw SAXS I(q) (left panel) and Porod-scaled data (right panel) for HGW powder pressed into a Cu grid for different temperatures (offset ~10-15 K).

References

1. Bachler, J., Giebelmann, J. & Loerting, T. Experimental evidence for glass polymorphism in vitrified water droplets. *Proc. Natl. Acad. Sci. USA* **118,** e2108194118; 10.1073/pnas.2108194118 (2021).

2. Madsen, A. *et al.* Materials Imaging and Dynamics (MID) instrument at the European X-ray Free-Electron Laser Facility. *J. Synchrotron Rad* **28,** 637–649; 10.1107/S1600577521001302 (2021).

3. Kohl, I., Bachmann, L., Hallbrucker, A., Mayer, E. & Loerting, T. Liquid-like relaxation in hyperquenched water at ≤ 140 K. *Phys. Chem. Chem. Phys.* **7,** 3210–3220; 10.1039/b507651j (2005).

4. Johari, G. P., Hallbrucker, A. & Mayer, E. Isotope effect on the glass transition and crystallization of hyperquenched glassy water. *The Journal of Chemical Physics* **92,** 6742–6746; 10.1063/1.458593 (1990).

5. Feistel, R. & Wagner, W. A New Equation of State for H2O Ice Ih. *JPCRD* **35,** 1021–1047; 10.1063/1.2183324 (2006).

6. Bowron, D. T. *et al.* The local and intermediate range structures of the five amorphous ices at 80 K and ambient pressure: a Faber-Ziman and Bhatia-Thornton analysis. *J. Chem. Phys.* **125,** 194502; 10.1063/1.2378921 (2006).

7. Malkin, T. L. *et al.* Stacking disorder in ice I. *Physical chemistry chemical physics : PCCP* **17,** 60–76; 10.1039/c4cp02893g (2015).

8. Lehmkühler, F. *et al.* Emergence of anomalous dynamics in soft matter probed at the European XFEL. *Proc. Natl. Acad. Sci. USA* **117,** 24110–24116; 10.1073/pnas.2003337117 (2020).

9. Tulk, C. A. *et al.* Structural studies of several distinct metastable forms of amorphous ice. *Science (New York, N.Y.)* **297,** 1320–1323; 10.1126/science.1074178 (2002).

10. Li, H. *et al.* Intrinsic Dynamics of Amorphous Ice Revealed by a Heterodyne Signal in X-ray Photon Correlation Spectroscopy Experiments. *J. Phys. Chem. Lett.* **14,** 10999–11007; 10.1021/acs.jpclett.3c02470 (2023).

11. Bachler, J., Giebelmann, J., Amann-Winkel, K. & Loerting, T. Pressure-annealed high-density amorphous ice made from vitrified water droplets: A systematic calorimetry study on water's second glass transition. *J. Chem. Phys.* **157,** 64502; 10.1063/5.0100571 (2022).

12. Feign, L. A. & Svergun, D. I. *Structure Analysis by Small-Angle X-Ray and Neutron Scattering* (Springer US, Boston, MA, s.l., 1987).

13. Gunier, A. & Fournet, G. *Small-angle Scattering of X-rays* (John Wiley & Sons, Ltd, New York, 1955).

14. Orthaber, D., Bergmann, A. & Glatter, O. SAXS experiments on absolute scale with Kratky systems using water as a secondary standard. *J Appl Crystallogr* **33,** 218–225; 10.1107/S0021889899015216 (2000).

15. Marion, G. & Jakubowski, S. The compressibility of ice to 2.0 kbar. *Cold Regions Science and Technology* **38,** 211–218; 10.1016/j.coldregions.2003.10.008 (2004).

16. Paglia, G. *et al.* Boehmite-Derived γ-Alumina System. 2. Consideration of Hydrogen and Surface Effects. *Chem. Mater.* **16,** 1914–1923; 10.1021/cm035193e (2004).

17. Hammouda, B. A new Guinier–Porod model. *J Appl Crystallogr* **43,** 716–719; 10.1107/S0021889810015773 (2010).
